# Supplementary material
Source: PubMed Central journal article supplement (PMC4785103)
Supplement: NIHMS734803-supplement-Supplementary_File_2.pdf [file NIHMS734803-supplement-Supplementary_File_2.pdf]

## Supplementary Figure 16

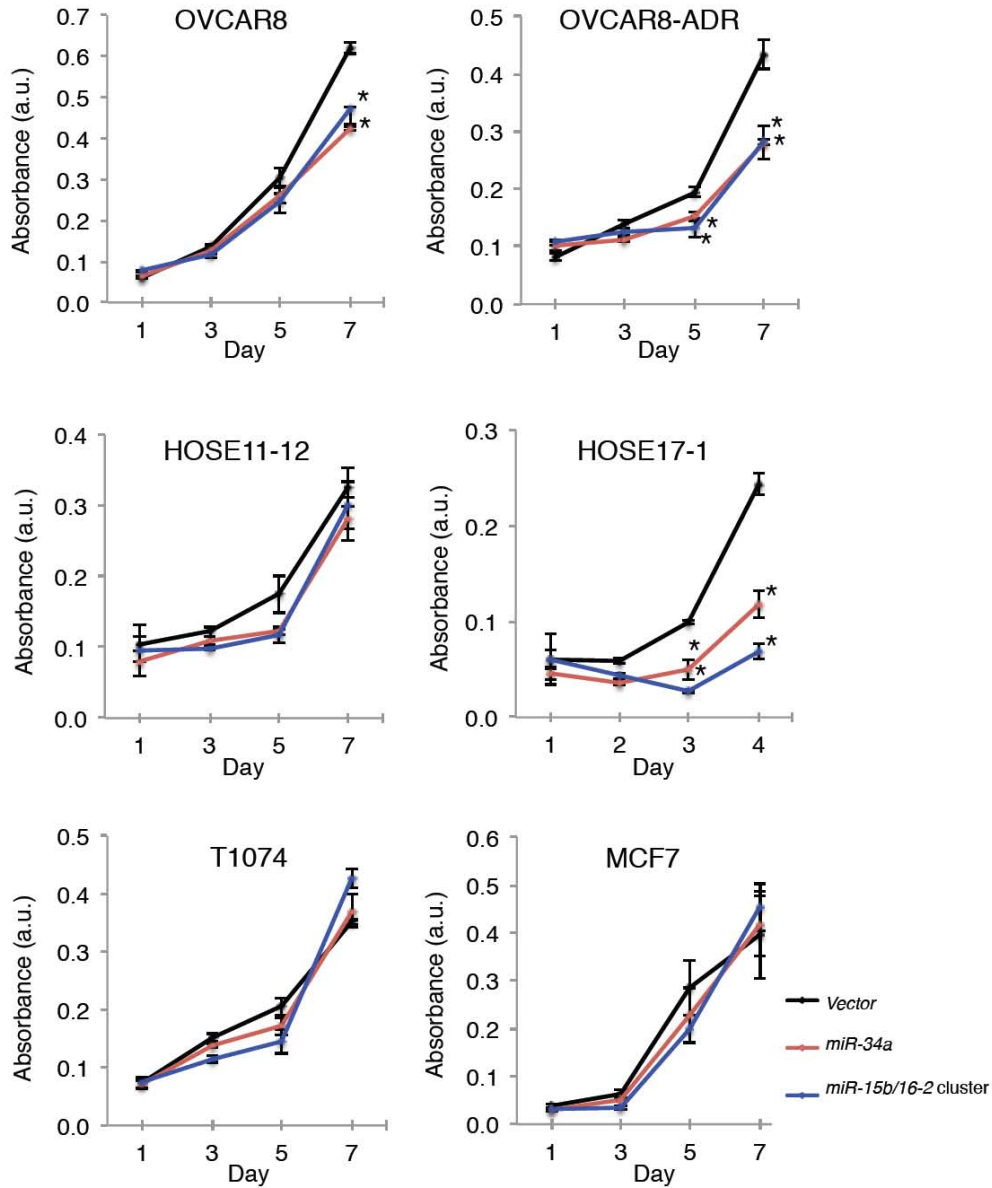

**Supplementary Figure 16** Anti-Proliferative Effects of *miR-34a* and the *miR-15b/16-2* Cluster Vary Across Different Cell Lines. The proliferation of OVCAR8, OVCAR8-ADR, HOSE11-12, HOSE17-1, T1074 and MCF7 cells infected with a lentivirus encoding *miR-34a*, a lentivirus encoding the *miR-15b/16-2* cluster, or vector control was characterized by absorbance measurements ( $OD_{570} - OD_{650}$ ) using the MTT assay. Data represent mean  $\pm$  s.d. of three independent infections ( $*P < 0.05$ ).

## Supplementary Figure 17

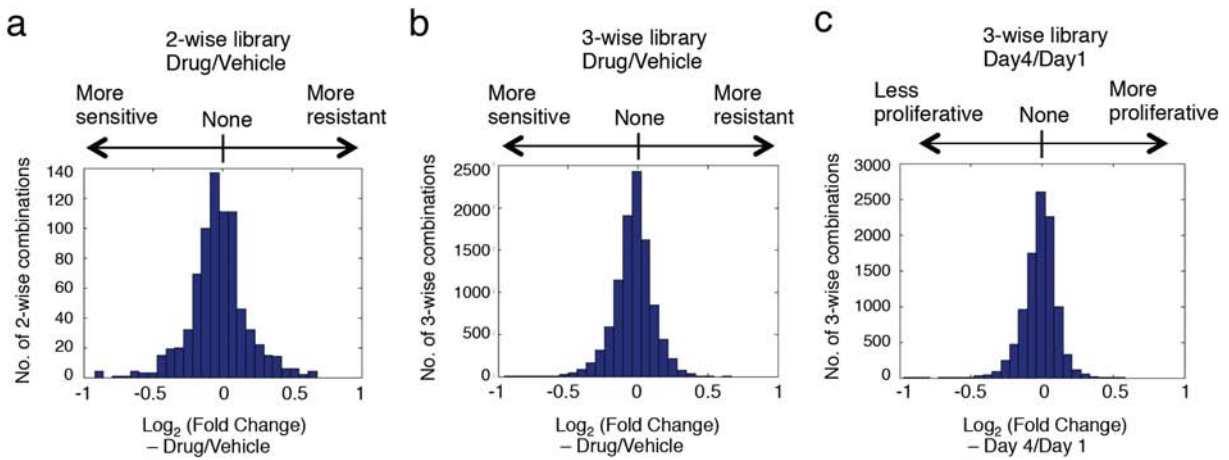

**Supplementary Figure 17** Frequency Distribution of Log<sub>2</sub> Fold-Change Ratios for the miRNA Combinations in the Pooled Screens. **a-c**, The distribution of log<sub>2</sub> ratios determined for the drug-sensitivity screens with the 2-wise (**a**) and 3-wise (**b**) miRNA combinations, and the cell-proliferation screen with the 3-wise miRNA combinations (**c**), were plotted in histograms based on their log<sub>2</sub> ratios. All log<sub>2</sub> ratios shown were calculated from the mean of two biological replicates.

**Supplementary Table 1** List of Candidate miRNAs and Primers Used for Barcoded Library Cloning

| <b>miRNA precursor</b>             | <b>Forward primer (5' to 3')</b>              | <b>Reverse primer (5' to 3')</b>                                |
|------------------------------------|-----------------------------------------------|-----------------------------------------------------------------|
| <i>let-7a</i>                      | CTCTAGAGATCTGGAGCGGAT<br>TCAGATAACCAAGC       | ATCGCAATTGTCGCGTTTGAATCCGTTGCG<br>GATCCGGTTTCCCCACCCCATCCAGTG   |
| <i>let-7b/miR-4763</i><br>cluster  | CTCTAGAGATCTGGCAGACAG<br>TGGCTCCTCTGTACC      | ATCGCAATTGATGACCTTGAATCCGTTGCG<br>GATCCCCTGTCCCAGCAGACAGCGCG    |
| <i>let-7c</i>                      | CTCTAGAGATCTGGCAGGTTA<br>GATGGTCAGAAGAC       | ATCGCAATTGCGTTCTGTGAATCCGTTGCG<br>GATCCCTCGACGGCTCAAGTGTGCTCCA  |
| <i>let-7d</i>                      | CTCTAGAGATCTCAGGTTAATT<br>TGAAGTGCATCTGCC     | ATCGCAATTGCGAAAGGTGAATCCGTTGCG<br>GATCCGAGGAGGAACAGCTGAGAGTCTC  |
| <i>let-7e/miR-99b</i><br>cluster   | CTCTAGAGATCTGGCTGAGTC<br>CTTGGATTCCAGGAAC     | ATCGCAATTGCTCCTTCGGAATCCGTTGCG<br>GATCCGAAAGCTAGGAGGCCGTATAGTG  |
| <i>let-7i</i>                      | CTCTAGAGATCTCACCCGGGC<br>GCCGGCGCCGCTC        | ATCGCAATTGTTGGCAGTGAATCCGTTGCG<br>GATCCGCATCGCGGTCCACCCCACTC    |
| <i>miR-10b</i>                     | CTCTAGAGATCTAGAAGAATA<br>TCTGGTTGTTGCGCTG     | ATCGCAATTGTATGACGTGAATCCGTTGCG<br>GATCCAGGATACTCTGTTTAAAGGTGAGG |
| <i>miR-126</i>                     | CTCTAGAGATCTGGAAGGCGG<br>TGGGGACTCCCTCTCC     | ATCGCAATTGTGGTAACGGAATCCGTTGCG<br>GATCCGCCTGCCTGGCGCTGGCCAGAGG  |
| <i>miR-128b</i>                    | CTCTAGAGATCTGAAGAGAGT<br>GCTTCCTCTGTTCTTAAAG  | ATCGCAATTGTTGCGTGCGAATCCGTTGCG<br>GATCCCAGTGCAGAAATCAGATCACGGAG |
| <i>miR-129-2</i>                   | CTCTAGAGATCTCCTTCTCGCC<br>CTCCACACACTTCTC     | ATCGCAATTGGTCTATGCGAATCCGTTGCG<br>GATCCGAAGACAGGTGACCAAAGCCTCG  |
| <i>miR-132</i>                     | CTCTAGAGATCTTGATCAACG<br>CAGGCGCCGCCATC       | ATCGCAATTGTAGGACGCGAATCCGTTGCG<br>GATCCGAGCCCTGGCTGGGATACCTTGG  |
| <i>miR-15b/16-2</i><br>cluster     | CTCTAGAGATCTCGGCCTGCA<br>GAGATAATACTTCTGTC    | ATCGCAATTGCTATGACTGAATCCGTTGCG<br>GATCCTAGTTGCTGTATCCCTGTACAC   |
| <i>miR-16-1/15a</i><br>cluster     | CTCTAGAGATCTAGTTGTATTG<br>CCCTGTAAAGTTGGC     | ATCGCAATTGGGGATACTGAATCCGTTGCG<br>GATCCACAGAATCATACTAAAATAACA   |
| <i>miR-181a</i>                    | CTCTAGAGATCTCTGCACAGT<br>CTATCCCACAGTTC       | ATCGCAATTGTATAAGCCGAATCCGTTGCG<br>GATCCATCATGGACTGCTCCTTACCTTG  |
| <i>miR-181c</i>                    | CTCTAGAGATCTAGGTGCAAA<br>CAGCACCTGAAAAGCG     | ATCGCAATTGATTTGGACGAATCCGTTGCG<br>GATCCGGAAGGTCAGAGTCACCGGCAGG  |
| <i>miR-188</i>                     | CTCTAGAGATCTGCATGAGCA<br>CATGGACAGGTACACC     | ATCGCAATTGTACGCCACGAATCCGTTGCG<br>GATCCCTGAGATGGGAGAAAGGACATGG  |
| <i>miR-196</i>                     | CTCTAGAGATCTGTCTCTGGA<br>ATCTGAGCTATCAGG      | ATCGCAATTGGATTACAGGAATCCGTTGCG<br>GATCCGTTGCTCCTGGATGAAGGACCTC  |
| <i>miR-199b/3154</i><br>cluster    | CTCTAGAGATCTCTGGAACCG<br>TTCGAGAGAGGCC        | ATCGCAATTGTCATCTTCGAATCCGTTGCG<br>GATCCCCACATCCCCAGTCCCCATTGA   |
| <i>miR-211</i>                     | CTCTAGAGATCTCGAAGAATA<br>CATTGGTCGATGACTG     | ATCGCAATTGTCCATCCGAATCCGTTGCG<br>GATCCGCTGTGTCCACCAGAGTAATTA    |
| <i>miR-212</i>                     | CTCTAGAGATCTTCTGCGAGC<br>GGAGCTGTCTCTCA       | ATCGCAATTGCTCTAAACGAATCCGTTGCG<br>GATCCTGCGTTGATCAGCACCGCGGACA  |
| <i>miR-216</i>                     | CTCTAGAGATCTCAGCAAGAG<br>GAGTAGCTTGATAATGTGCG | ATCGCAATTGCAGTACCGAATCCGTTGCG<br>GATCCGGTTTCTTTCCAGCACAAACAG    |
| <i>miR-24-2/27a/23a</i><br>cluster | CTCTAGAGATCTCCTGTGATCA<br>AAGGAAGCATCTGGG     | ATCGCAATTGAACTCCGGGAATCCGTTGCG<br>GATCCCATCTCTGCTCCAAGCATCAGCC  |
| <i>miR-29a</i>                     | CTCTAGAGATCTGGGGCTTTC<br>TGGAACCAATCCCTCA     | ATCGCAATTGTGGTGGATGAATCCGTTGCG<br>GATCCTCATGATATGCTAATAGTGAACC  |
| <i>miR-29b</i>                     | CTCTAGAGATCTCCATCAATAA<br>CAAATTCAGTGAC       | ATCGCAATTGTCACAGATGAATCCGTTGCG<br>GATCCGCCAGTGCAGAGACCTGACTGCC  |
| <i>miR-29c</i>                     | CTCTAGAGATCTGATTGTCATG<br>GGCAGGGGAGAG        | ATCGCAATTGGGTCTTTGGAATCCGTTGCG<br>GATCCCAGAATTTAGAACAGCACTAC    |

|                                    |                                            |                                                                 |
|------------------------------------|--------------------------------------------|-----------------------------------------------------------------|
| <i>miR-31</i>                      | CTCTAGAGATCTTAGTCCATAA<br>ACATTCTCGAGGTTTC | ATCGCAATTGATCGTCCGGAATTCCGTTGCG<br>GATCCGGACACAATACATAGCAGGACAG |
| <i>miR-324</i>                     | CTCTAGAGATCTCCAAGATAA<br>GGGCTGACCTAGCTTG  | ATCGCAATTGCGAACTGAGAATTCCGTTGCG<br>GATCCCATCCAGCGTAGACTGAACTCTG |
| <i>miR-328</i>                     | CTCTAGAGATCTCCAAGCTCA<br>GCTCAGGGCCTAAGC   | ATCGCAATTGCTGTGGACGAATTCCGTTGCG<br>GATCCCCAGCGCGTACAGCCGGGTCGG  |
| <i>miR-34a</i>                     | CTCTAGAGATCTCTGGCCTCTC<br>CAGTAGCTAGGACTAC | ATCGCAATTGAGGATGTGGAATTCCGTTGCG<br>GATCCCTGGCTACTATTCTCCCTACGTG |
| <i>miR-373</i>                     | CTCTAGAGATCTGCAGCTGTG<br>ACCAAGGGGCTGTA    | ATCGCAATTGTGGAGATAGAATTCCGTTGCG<br>GATCCCTGCAGGTGAACCCCGTATCCT  |
| <i>miR-376a</i>                    | CTCTAGAGATCTCCGTAGGGC<br>CTGAGTAGGTGC      | ATCGCAATTGGGTAGTCAGAATTCCGTTGCG<br>GATCCCAGCCCACTCAGGTATTCTC    |
| <i>miR-429</i>                     | CTCTAGAGATCTTAACCCGAC<br>CGAGCTTCAGGAAGC   | ATCGCAATTGCTGAATGAGAATTCCGTTGCG<br>GATCCCTCCGGGTATCTGTGACTGTGAC |
| <i>miR-451/144/4732</i><br>cluster | CTCTAGAGATCTCAGCCCTGA<br>CCTGTCCTGTTCTG    | ATCGCAATTGGGCAACGAGAATTCCGTTGCG<br>GATCCCCTGCCTTGTTTGAGCTGGAGTC |
| <i>miR-488</i>                     | CTCTAGAGATCTGGCGTAGTA<br>GAGGTAGGAATGATAG  | ATCGCAATTGAACGCGAAGAATTCCGTTGCG<br>GATCCCCTCAACTACTGCCCCCAATC   |
| <i>miR-489</i>                     | CTCTAGAGATCTATCAGATTCC<br>TTTCCTGTGGAT     | ATCGCAATTGATGACTCAGAATTCCGTTGCG<br>GATCCAAGTGTTATGTCTATACTACTT  |
| <i>miR-708</i>                     | CTCTAGAGATCTGTGAAGGGG<br>CAAGCTCTACTAAAGG  | ATCGCAATTGCTGACCAAGAATTCCGTTGCG<br>GATCCCTCAGGAGACAATTCAGGCCTAG |
| <i>miR-9-1</i>                     | CTCTAGAGATCTTTCGGTCTCT<br>GTCGTGTCTGTATCTC | ATCGCAATTGCGTGAGCTGAATTCCGTTGCG<br>GATCCTGCTGGGGGAAAAATATGGCACC |
| <i>miR-93/106b</i><br>cluster      | CTCTAGAGATCTCATGTGCCG<br>CGAGAAGCAGCCCATG  | ATCGCAATTGATCTTGAGGAATTCCGTTGCG<br>GATCCAGTGCTAGCTCAGCAGTAGGTTG |
| <i>miR-99a</i>                     | CTCTAGAGATCTTTTAGTTTTG<br>AATATTTATGAAGGCC | ATCGCAATTGGGATTCGGGAATTCCGTTGCG<br>GATCCGTACATGGAATCGAACTTGAATG |

**Supplementary Table 2** Reported Expression of Candidate miRNAs in Cancer Cells

| miRNA expression in cancer cells                                                           | miRNAs                                                                                                                                                                                                                                                                                                                                                                                                                                                                     | References |
|--------------------------------------------------------------------------------------------|----------------------------------------------------------------------------------------------------------------------------------------------------------------------------------------------------------------------------------------------------------------------------------------------------------------------------------------------------------------------------------------------------------------------------------------------------------------------------|------------|
| miRNAs reported to be down-regulated in cancer cells resistant to taxanes                  | <i>miR-15b/16-2</i> cluster, <i>miR-24-2/27a/23a</i> cluster, <i>miR-29a</i> , <i>miR-29b</i> , <i>miR-126</i> , <i>miR-128b</i> , and <i>miR-324</i>                                                                                                                                                                                                                                                                                                                      | 62–64      |
| miRNAs reported to be down-regulated in cancer cells resistant to other chemotherapy drugs | <i>let-7a</i> , <i>let-7b</i> , <i>let-7c</i> , <i>let-7d</i> , <i>let-7i</i> , <i>miR-9-1</i> , <i>miR-10b</i> , <i>miR-29a</i> , <i>miR-29c</i> , <i>miR-31</i> , <i>miR-34a</i> , <i>miR-126</i> , <i>miR-129-2</i> , <i>miR-132</i> , <i>miR-181a</i> , <i>miR-181c</i> , <i>miR-196</i> , <i>miR-199b</i> , <i>miR-211</i> , <i>miR-212</i> , <i>miR-216</i> , <i>miR-328</i> , <i>miR-373</i> , <i>miR-429</i> , <i>miR-451/144/4732</i> cluster, and <i>miR-489</i> | 64–78      |
| miRNAs reported to have altered expression in ovarian cancer cell lines                    | <i>miR-16-1/15a</i> cluster, <i>miR-93/106b</i> cluster, <i>miR-99</i> , <i>miR-376a</i> , and <i>miR-488</i>                                                                                                                                                                                                                                                                                                                                                              | 29,79,80   |

**Supplementary Table 3** Expression of the Experimentally Validated Targets of the Selected 39 miRNAs in OVCAR8-ADR Cells

(Please refer to the attached supplementary Excel file.)

**Supplementary Table 4** List of the Missing Three-Wise Combinations in Infected Cell Pool

| <i>miR-A</i>                   | <i>miR-B</i>                    | <i>miR-C</i>                    | No. of barcode count in plasmid pool |
|--------------------------------|---------------------------------|---------------------------------|--------------------------------------|
| <i>let-7a</i>                  | <i>miR-9-1</i>                  | <i>miR-181c</i>                 | 1                                    |
| <i>let-7a</i>                  | <i>miR-16-1/15a</i> cluster     | <i>miR-126</i>                  | 1                                    |
| <i>let-7a</i>                  | <i>miR-29a</i>                  | <i>miR-15b/16-2</i> cluster     | 1                                    |
| <i>let-7a</i>                  | <i>miR-29c</i>                  | <i>miR-31</i>                   | 1                                    |
| <i>let-7a</i>                  | <i>miR-181c</i>                 | <i>miR-708</i>                  | 1                                    |
| <i>let-7a</i>                  | <i>miR-376a</i>                 | <i>let-7c</i>                   | 1                                    |
| <i>let-7a</i>                  | <i>miR-216</i>                  | <i>miR-181a</i>                 | 1                                    |
| <i>let-7a</i>                  | <i>miR-429</i>                  | <i>miR-31</i>                   | 1                                    |
| <i>let-7a</i>                  | <i>miR-451/144/4732</i> cluster | <i>miR-181c</i>                 | 1                                    |
| <i>let-7a</i>                  | <i>miR-489</i>                  | <i>miR-181a</i>                 | 1                                    |
| <i>let-7a</i>                  | <i>miR-10b</i>                  | <i>miR-128b</i>                 | 1                                    |
| <i>let-7b/miR-4763</i> cluster | <i>miR-181c</i>                 | <i>miR-29a</i>                  | 1                                    |
| <i>let-7b/miR-4763</i> cluster | <i>miR-324</i>                  | <i>miR-31</i>                   | 1                                    |
| <i>let-7b/miR-4763</i> cluster | <i>miR-10b</i>                  | <i>let-7i</i>                   | 1                                    |
| <i>let-7c</i>                  | <i>miR-29b</i>                  | <i>miR-181a</i>                 | 1                                    |
| <i>let-7c</i>                  | <i>let-7e/miR-99b</i> cluster   | <i>miR-376a</i>                 | 1                                    |
| <i>let-7c</i>                  | <i>miR-128b</i>                 | <i>let-7c</i>                   | 1                                    |
| <i>let-7c</i>                  | <i>miR-181c</i>                 | <i>let-7c</i>                   | 1                                    |
| <i>let-7c</i>                  | <i>miR-181c</i>                 | <i>miR-488</i>                  | 1                                    |
| <i>let-7c</i>                  | <i>miR-212</i>                  | <i>miR-324</i>                  | 1                                    |
| <i>let-7c</i>                  | <i>miR-324</i>                  | <i>miR-324</i>                  | 1                                    |
| <i>let-7c</i>                  | <i>miR-324</i>                  | <i>miR-451/144/4732</i> cluster | 1                                    |
| <i>let-7c</i>                  | <i>miR-31</i>                   | <i>miR-31</i>                   | 1                                    |
| <i>let-7c</i>                  | <i>miR-328</i>                  | <i>miR-199b/3154</i> cluster    | 1                                    |
| <i>let-7c</i>                  | <i>miR-373</i>                  | <i>miR-451/144/4732</i> cluster | 1                                    |
| <i>let-7c</i>                  | <i>miR-429</i>                  | <i>miR-181a</i>                 | 1                                    |
| <i>let-7c</i>                  | <i>miR-429</i>                  | <i>miR-376a</i>                 | 1                                    |
| <i>let-7c</i>                  | <i>miR-451/144/4732</i> cluster | <i>miR-128b</i>                 | 1                                    |
| <i>let-7c</i>                  | <i>miR-489</i>                  | <i>miR-211</i>                  | 1                                    |
| <i>let-7c</i>                  | <i>miR-10b</i>                  | <i>let-7d</i>                   | 1                                    |
| <i>let-7d</i>                  | <i>miR-29a</i>                  | <i>miR-16-1/15a</i> cluster     | 1                                    |
| <i>let-7d</i>                  | <i>miR-29a</i>                  | <i>miR-376a</i>                 | 1                                    |
| <i>let-7d</i>                  | <i>miR-29b</i>                  | <i>miR-181c</i>                 | 1                                    |
| <i>let-7d</i>                  | <i>miR-93/106b</i> cluster      | <i>miR-451/144/4732</i> cluster | 1                                    |
| <i>let-7d</i>                  | <i>miR-132</i>                  | <i>miR-181c</i>                 | 1                                    |
| <i>let-7d</i>                  | <i>miR-376a</i>                 | <i>miR-196</i>                  | 1                                    |
| <i>miR-9-1</i>                 | <i>let-7c</i>                   | <i>miR-29a</i>                  | 1                                    |
| <i>miR-9-1</i>                 | <i>miR-16-1/15a</i> cluster     | <i>miR-34a</i>                  | 1                                    |
| <i>miR-9-1</i>                 | <i>miR-16-1/15a</i> cluster     | <i>miR-128b</i>                 | 1                                    |
| <i>miR-9-1</i>                 | <i>miR-29a</i>                  | <i>miR-376a</i>                 | 1                                    |
| <i>miR-9-1</i>                 | <i>miR-29c</i>                  | <i>miR-376a</i>                 | 1                                    |
| <i>miR-9-1</i>                 | <i>miR-181a</i>                 | <i>miR-16-1/15a</i> cluster     | 1                                    |
| <i>miR-9-1</i>                 | <i>miR-181c</i>                 | <i>miR-29b</i>                  | 1                                    |
| <i>miR-9-1</i>                 | <i>miR-181c</i>                 | <i>miR-212</i>                  | 1                                    |
| <i>miR-9-1</i>                 | <i>miR-376a</i>                 | <i>miR-451/144/4732</i> cluster | 1                                    |
| <i>miR-9-1</i>                 | <i>miR-15b/16-2</i> cluster     | <i>miR-376a</i>                 | 1                                    |
| <i>miR-9-1</i>                 | <i>miR-126</i>                  | <i>miR-376a</i>                 | 1                                    |

|                             |                                 |                                 |   |
|-----------------------------|---------------------------------|---------------------------------|---|
| <i>miR-9-1</i>              | <i>miR-328</i>                  | <i>miR-376a</i>                 | 1 |
| <i>miR-9-1</i>              | <i>miR-373</i>                  | <i>miR-128b</i>                 | 1 |
| <i>miR-9-1</i>              | <i>miR-373</i>                  | <i>let-7i</i>                   | 1 |
| <i>miR-9-1</i>              | <i>miR-451/144/4732 cluster</i> | <i>miR-34a</i>                  | 1 |
| <i>miR-9-1</i>              | <i>miR-451/144/4732 cluster</i> | <i>miR-196</i>                  | 1 |
| <i>miR-9-1</i>              | <i>miR-489</i>                  | <i>miR-429</i>                  | 1 |
| <i>miR-16-1/15a cluster</i> | <i>let-7a</i>                   | <i>miR-181a</i>                 | 1 |
| <i>miR-16-1/15a cluster</i> | <i>let-7b/miR-4763 cluster</i>  | <i>miR-29a</i>                  | 1 |
| <i>miR-16-1/15a cluster</i> | <i>let-7c</i>                   | <i>let-7d</i>                   | 1 |
| <i>miR-16-1/15a cluster</i> | <i>let-7c</i>                   | <i>miR-181c</i>                 | 1 |
| <i>miR-16-1/15a cluster</i> | <i>miR-16-1/15a cluster</i>     | <i>let-7d</i>                   | 1 |
| <i>miR-16-1/15a cluster</i> | <i>let-7e/miR-99b cluster</i>   | <i>miR-29a</i>                  | 1 |
| <i>miR-16-1/15a cluster</i> | <i>let-7e/miR-99b cluster</i>   | <i>miR-376a</i>                 | 1 |
| <i>miR-16-1/15a cluster</i> | <i>miR-128b</i>                 | <i>miR-451/144/4732 cluster</i> | 1 |
| <i>miR-16-1/15a cluster</i> | <i>miR-324</i>                  | <i>miR-10b</i>                  | 1 |
| <i>miR-16-1/15a cluster</i> | <i>miR-376a</i>                 | <i>miR-10b</i>                  | 1 |
| <i>miR-16-1/15a cluster</i> | <i>miR-31</i>                   | <i>miR-9-1</i>                  | 1 |
| <i>miR-16-1/15a cluster</i> | <i>miR-31</i>                   | <i>miR-181a</i>                 | 1 |
| <i>miR-16-1/15a cluster</i> | <i>miR-199b/3154 cluster</i>    | <i>let-7c</i>                   | 1 |
| <i>miR-16-1/15a cluster</i> | <i>miR-216</i>                  | <i>miR-29a</i>                  | 1 |
| <i>miR-16-1/15a cluster</i> | <i>miR-216</i>                  | <i>miR-181a</i>                 | 1 |
| <i>miR-16-1/15a cluster</i> | <i>miR-328</i>                  | <i>miR-128b</i>                 | 1 |
| <i>miR-29a</i>              | <i>let-7c</i>                   | <i>miR-181a</i>                 | 1 |
| <i>miR-29a</i>              | <i>let-7c</i>                   | <i>miR-328</i>                  | 1 |
| <i>miR-29a</i>              | <i>let-7d</i>                   | <i>miR-29a</i>                  | 1 |
| <i>miR-29a</i>              | <i>miR-16-1/15a cluster</i>     | <i>let-7a</i>                   | 1 |
| <i>miR-29a</i>              | <i>miR-16-1/15a cluster</i>     | <i>miR-212</i>                  | 1 |
| <i>miR-29a</i>              | <i>miR-16-1/15a cluster</i>     | <i>miR-126</i>                  | 1 |
| <i>miR-29a</i>              | <i>miR-29a</i>                  | <i>let-7b/miR-4763 cluster</i>  | 1 |
| <i>miR-29a</i>              | <i>miR-29a</i>                  | <i>miR-24-2/27a/23a cluster</i> | 1 |
| <i>miR-29a</i>              | <i>miR-29a</i>                  | <i>miR-211</i>                  | 1 |
| <i>miR-29a</i>              | <i>miR-128b</i>                 | <i>miR-181a</i>                 | 1 |
| <i>miR-29a</i>              | <i>miR-128b</i>                 | <i>miR-324</i>                  | 1 |
| <i>miR-29a</i>              | <i>miR-128b</i>                 | <i>miR-31</i>                   | 1 |
| <i>miR-29a</i>              | <i>miR-128b</i>                 | <i>miR-451/144/4732 cluster</i> | 1 |
| <i>miR-29a</i>              | <i>miR-181a</i>                 | <i>miR-29b</i>                  | 1 |
| <i>miR-29a</i>              | <i>miR-181a</i>                 | <i>miR-188</i>                  | 1 |
| <i>miR-29a</i>              | <i>miR-181c</i>                 | <i>miR-34a</i>                  | 1 |
| <i>miR-29a</i>              | <i>miR-376a</i>                 | <i>let-7a</i>                   | 1 |
| <i>miR-29a</i>              | <i>let-7i</i>                   | <i>miR-451/144/4732 cluster</i> | 1 |
| <i>miR-29a</i>              | <i>miR-15b/16-2 cluster</i>     | <i>miR-29b</i>                  | 1 |
| <i>miR-29a</i>              | <i>miR-15b/16-2 cluster</i>     | <i>miR-216</i>                  | 1 |
| <i>miR-29a</i>              | <i>miR-24-2/27a/23a cluster</i> | <i>miR-216</i>                  | 1 |
| <i>miR-29a</i>              | <i>miR-31</i>                   | <i>miR-376a</i>                 | 1 |
| <i>miR-29a</i>              | <i>miR-373</i>                  | <i>miR-24-2/27a/23a cluster</i> | 1 |
| <i>miR-29a</i>              | <i>miR-429</i>                  | <i>miR-29b</i>                  | 1 |
| <i>miR-29a</i>              | <i>miR-451/144/4732 cluster</i> | <i>miR-126</i>                  | 1 |
| <i>miR-29a</i>              | <i>miR-489</i>                  | <i>miR-181a</i>                 | 1 |
| <i>miR-29a</i>              | <i>miR-10b</i>                  | <i>miR-429</i>                  | 1 |
| <i>miR-29b</i>              | <i>let-7a</i>                   | <i>miR-376a</i>                 | 1 |
| <i>miR-29b</i>              | <i>miR-9-1</i>                  | <i>miR-31</i>                   | 1 |
| <i>miR-29b</i>              | <i>miR-16-1/15a cluster</i>     | <i>miR-29c</i>                  | 1 |
| <i>miR-29b</i>              | <i>miR-16-1/15a cluster</i>     | <i>miR-10b</i>                  | 1 |



|                               |                                 |                                 |   |
|-------------------------------|---------------------------------|---------------------------------|---|
| <i>miR-29b</i>                | <i>miR-181c</i>                 | <i>miR-99a</i>                  | 1 |
| <i>miR-29b</i>                | <i>miR-181c</i>                 | <i>miR-129-2</i>                | 1 |
| <i>miR-29b</i>                | <i>miR-324</i>                  | <i>miR-29a</i>                  | 1 |
| <i>miR-29b</i>                | <i>miR-376a</i>                 | <i>miR-9-1</i>                  | 1 |
| <i>miR-29b</i>                | <i>miR-15b/16-2 cluster</i>     | <i>miR-376a</i>                 | 1 |
| <i>miR-29b</i>                | <i>miR-24-2/27a/23a cluster</i> | <i>miR-451/144/4732 cluster</i> | 1 |
| <i>miR-29b</i>                | <i>miR-196</i>                  | <i>miR-29a</i>                  | 1 |
| <i>miR-29b</i>                | <i>miR-199b/3154 cluster</i>    | <i>miR-451/144/4732 cluster</i> | 1 |
| <i>miR-29b</i>                | <i>miR-328</i>                  | <i>miR-181a</i>                 | 1 |
| <i>miR-29b</i>                | <i>miR-373</i>                  | <i>miR-211</i>                  | 1 |
| <i>miR-29b</i>                | <i>miR-373</i>                  | <i>miR-373</i>                  | 1 |
| <i>miR-29b</i>                | <i>miR-451/144/4732 cluster</i> | <i>miR-29a</i>                  | 1 |
| <i>miR-29b</i>                | <i>miR-451/144/4732 cluster</i> | <i>miR-99a</i>                  | 1 |
| <i>miR-29b</i>                | <i>miR-451/144/4732 cluster</i> | <i>miR-488</i>                  | 1 |
| <i>miR-29b</i>                | <i>miR-10b</i>                  | <i>let-7i</i>                   | 1 |
| <i>miR-29b</i>                | <i>miR-10b</i>                  | <i>miR-10b</i>                  | 1 |
| <i>miR-29c</i>                | <i>let-7c</i>                   | <i>miR-376a</i>                 | 1 |
| <i>miR-29c</i>                | <i>miR-199b/3154 cluster</i>    | <i>miR-181c</i>                 | 1 |
| <i>miR-29c</i>                | <i>miR-451/144/4732 cluster</i> | <i>miR-376a</i>                 | 1 |
| <i>miR-29c</i>                | <i>miR-451/144/4732 cluster</i> | <i>miR-199b/3154 cluster</i>    | 1 |
| <i>miR-34a</i>                | <i>let-7a</i>                   | <i>miR-24-2/27a/23a cluster</i> | 1 |
| <i>miR-34a</i>                | <i>miR-16-1/15a cluster</i>     | <i>miR-99a</i>                  | 1 |
| <i>miR-34a</i>                | <i>miR-16-1/15a cluster</i>     | <i>miR-132</i>                  | 1 |
| <i>miR-34a</i>                | <i>miR-16-1/15a cluster</i>     | <i>miR-24-2/27a/23a cluster</i> | 1 |
| <i>miR-34a</i>                | <i>miR-128b</i>                 | <i>let-7d</i>                   | 1 |
| <i>miR-34a</i>                | <i>miR-128b</i>                 | <i>miR-181c</i>                 | 1 |
| <i>miR-34a</i>                | <i>miR-181c</i>                 | <i>let-7d</i>                   | 1 |
| <i>miR-34a</i>                | <i>miR-324</i>                  | <i>let-7e/miR-99b cluster</i>   | 1 |
| <i>miR-34a</i>                | <i>miR-324</i>                  | <i>miR-31</i>                   | 1 |
| <i>miR-34a</i>                | <i>miR-324</i>                  | <i>miR-126</i>                  | 1 |
| <i>miR-34a</i>                | <i>miR-376a</i>                 | <i>let-7c</i>                   | 1 |
| <i>miR-34a</i>                | <i>miR-376a</i>                 | <i>miR-29c</i>                  | 1 |
| <i>miR-34a</i>                | <i>miR-376a</i>                 | <i>miR-373</i>                  | 1 |
| <i>miR-34a</i>                | <i>let-7i</i>                   | <i>miR-451/144/4732 cluster</i> | 1 |
| <i>miR-34a</i>                | <i>let-7i</i>                   | <i>miR-10b</i>                  | 1 |
| <i>miR-34a</i>                | <i>miR-15b/16-2 cluster</i>     | <i>miR-324</i>                  | 1 |
| <i>miR-34a</i>                | <i>miR-24-2/27a/23a cluster</i> | <i>miR-324</i>                  | 1 |
| <i>miR-34a</i>                | <i>miR-489</i>                  | <i>let-7e/miR-99b cluster</i>   | 1 |
| <i>miR-34a</i>                | <i>miR-489</i>                  | <i>let-7i</i>                   | 1 |
| <i>miR-99a</i>                | <i>miR-29b</i>                  | <i>miR-181c</i>                 | 1 |
| <i>miR-99a</i>                | <i>miR-181c</i>                 | <i>miR-489</i>                  | 1 |
| <i>miR-99a</i>                | <i>miR-376a</i>                 | <i>let-7c</i>                   | 1 |
| <i>miR-99a</i>                | <i>miR-31</i>                   | <i>miR-10b</i>                  | 1 |
| <i>miR-99a</i>                | <i>miR-10b</i>                  | <i>miR-181c</i>                 | 1 |
| <i>let-7e/miR-99b cluster</i> | <i>let-7d</i>                   | <i>miR-376a</i>                 | 1 |
| <i>let-7e/miR-99b cluster</i> | <i>miR-9-1</i>                  | <i>miR-29a</i>                  | 1 |
| <i>let-7e/miR-99b cluster</i> | <i>miR-9-1</i>                  | <i>let-7e/miR-99b cluster</i>   | 1 |
| <i>let-7e/miR-99b cluster</i> | <i>miR-9-1</i>                  | <i>miR-199b/3154 cluster</i>    | 1 |
| <i>let-7e/miR-99b cluster</i> | <i>miR-29a</i>                  | <i>miR-181c</i>                 | 1 |
| <i>let-7e/miR-99b cluster</i> | <i>miR-29b</i>                  | <i>miR-29a</i>                  | 1 |
| <i>let-7e/miR-99b cluster</i> | <i>let-7e/miR-99b cluster</i>   | <i>miR-376a</i>                 | 1 |
| <i>let-7e/miR-99b cluster</i> | <i>let-7e/miR-99b cluster</i>   | <i>let-7i</i>                   | 1 |
| <i>let-7e/miR-99b cluster</i> | <i>miR-708</i>                  | <i>miR-181c</i>                 | 1 |

|                               |                                 |                                 |   |
|-------------------------------|---------------------------------|---------------------------------|---|
| <i>let-7e/miR-99b</i> cluster | <i>miR-328</i>                  | <i>miR-31</i>                   | 1 |
| <i>let-7e/miR-99b</i> cluster | <i>miR-328</i>                  | <i>miR-373</i>                  | 1 |
| <i>let-7e/miR-99b</i> cluster | <i>miR-429</i>                  | <i>miR-31</i>                   | 1 |
| <i>let-7e/miR-99b</i> cluster | <i>miR-489</i>                  | <i>let-7i</i>                   | 1 |
| <i>let-7e/miR-99b</i> cluster | <i>miR-489</i>                  | <i>miR-24-2/27a/23a</i> cluster | 1 |
| <i>miR-93/106b</i> cluster    | <i>miR-181a</i>                 | <i>miR-126</i>                  | 1 |
| <i>miR-93/106b</i> cluster    | <i>miR-181c</i>                 | <i>miR-10b</i>                  | 1 |
| <i>miR-93/106b</i> cluster    | <i>miR-24-2/27a/23a</i> cluster | <i>miR-10b</i>                  | 1 |
| <i>miR-128b</i>               | <i>let-7a</i>                   | <i>miR-181c</i>                 | 1 |
| <i>miR-128b</i>               | <i>miR-16-1/15a</i> cluster     | <i>miR-181a</i>                 | 1 |
| <i>miR-128b</i>               | <i>miR-34a</i>                  | <i>miR-15b/16-2</i> cluster     | 1 |
| <i>miR-128b</i>               | <i>miR-34a</i>                  | <i>miR-10b</i>                  | 1 |
| <i>miR-128b</i>               | <i>miR-99a</i>                  | <i>miR-328</i>                  | 1 |
| <i>miR-128b</i>               | <i>let-7e/miR-99b</i> cluster   | <i>miR-126</i>                  | 1 |
| <i>miR-128b</i>               | <i>miR-128b</i>                 | <i>let-7c</i>                   | 1 |
| <i>miR-128b</i>               | <i>miR-128b</i>                 | <i>miR-128b</i>                 | 1 |
| <i>miR-128b</i>               | <i>miR-324</i>                  | <i>miR-9-1</i>                  | 1 |
| <i>miR-128b</i>               | <i>miR-324</i>                  | <i>miR-216</i>                  | 1 |
| <i>miR-128b</i>               | <i>miR-324</i>                  | <i>miR-451/144/4732</i> cluster | 1 |
| <i>miR-128b</i>               | <i>miR-488</i>                  | <i>miR-376a</i>                 | 1 |
| <i>miR-128b</i>               | <i>miR-708</i>                  | <i>miR-373</i>                  | 1 |
| <i>miR-128b</i>               | <i>let-7i</i>                   | <i>miR-16-1/15a</i> cluster     | 1 |
| <i>miR-128b</i>               | <i>miR-199b/3154</i> cluster    | <i>let-7a</i>                   | 1 |
| <i>miR-128b</i>               | <i>miR-216</i>                  | <i>miR-16-1/15a</i> cluster     | 1 |
| <i>miR-128b</i>               | <i>miR-328</i>                  | <i>miR-128b</i>                 | 1 |
| <i>miR-128b</i>               | <i>miR-328</i>                  | <i>miR-31</i>                   | 1 |
| <i>miR-128b</i>               | <i>miR-373</i>                  | <i>miR-16-1/15a</i> cluster     | 1 |
| <i>miR-128b</i>               | <i>miR-373</i>                  | <i>let-7i</i>                   | 1 |
| <i>miR-128b</i>               | <i>miR-373</i>                  | <i>miR-10b</i>                  | 1 |
| <i>miR-128b</i>               | <i>miR-429</i>                  | <i>miR-181a</i>                 | 1 |
| <i>miR-128b</i>               | <i>miR-429</i>                  | <i>miR-376a</i>                 | 1 |
| <i>miR-128b</i>               | <i>miR-429</i>                  | <i>miR-373</i>                  | 1 |
| <i>miR-128b</i>               | <i>miR-451/144/4732</i> cluster | <i>let-7a</i>                   | 1 |
| <i>miR-128b</i>               | <i>miR-451/144/4732</i> cluster | <i>miR-188</i>                  | 1 |
| <i>miR-128b</i>               | <i>miR-451/144/4732</i> cluster | <i>miR-211</i>                  | 1 |
| <i>miR-128b</i>               | <i>miR-10b</i>                  | <i>miR-181c</i>                 | 1 |
| <i>miR-129-2</i>              | <i>miR-376a</i>                 | <i>miR-212</i>                  | 1 |
| <i>miR-129-2</i>              | <i>miR-126</i>                  | <i>miR-181a</i>                 | 1 |
| <i>miR-129-2</i>              | <i>miR-451/144/4732</i> cluster | <i>miR-128b</i>                 | 1 |
| <i>miR-132</i>                | <i>let-7c</i>                   | <i>miR-128b</i>                 | 1 |
| <i>miR-132</i>                | <i>miR-93/106b</i> cluster      | <i>miR-31</i>                   | 1 |
| <i>miR-132</i>                | <i>let-7i</i>                   | <i>miR-451/144/4732</i> cluster | 1 |
| <i>miR-132</i>                | <i>miR-211</i>                  | <i>miR-376a</i>                 | 1 |
| <i>miR-132</i>                | <i>miR-373</i>                  | <i>miR-376a</i>                 | 1 |
| <i>miR-132</i>                | <i>miR-373</i>                  | <i>miR-451/144/4732</i> cluster | 1 |
| <i>miR-132</i>                | <i>miR-10b</i>                  | <i>miR-181c</i>                 | 1 |
| <i>miR-181a</i>               | <i>let-7a</i>                   | <i>miR-376a</i>                 | 1 |
| <i>miR-181a</i>               | <i>let-7c</i>                   | <i>miR-211</i>                  | 1 |
| <i>miR-181a</i>               | <i>let-7c</i>                   | <i>miR-429</i>                  | 1 |
| <i>miR-181a</i>               | <i>miR-16-1/15a</i> cluster     | <i>let-7i</i>                   | 1 |
| <i>miR-181a</i>               | <i>miR-29a</i>                  | <i>let-7c</i>                   | 1 |
| <i>miR-181a</i>               | <i>miR-29a</i>                  | <i>miR-29b</i>                  | 1 |
| <i>miR-181a</i>               | <i>miR-29a</i>                  | <i>miR-24-2/27a/23a</i> cluster | 1 |

|                 |                                 |                                 |   |
|-----------------|---------------------------------|---------------------------------|---|
| <i>miR-181a</i> | <i>miR-29c</i>                  | <i>miR-29a</i>                  | 1 |
| <i>miR-181a</i> | <i>miR-29c</i>                  | <i>miR-376a</i>                 | 1 |
| <i>miR-181a</i> | <i>miR-132</i>                  | <i>miR-31</i>                   | 1 |
| <i>miR-181a</i> | <i>miR-181c</i>                 | <i>miR-29a</i>                  | 1 |
| <i>miR-181a</i> | <i>miR-181c</i>                 | <i>miR-15b/16-2 cluster</i>     | 1 |
| <i>miR-181a</i> | <i>miR-376a</i>                 | <i>miR-451/144/4732 cluster</i> | 1 |
| <i>miR-181a</i> | <i>let-7i</i>                   | <i>miR-128b</i>                 | 1 |
| <i>miR-181a</i> | <i>let-7i</i>                   | <i>miR-181a</i>                 | 1 |
| <i>miR-181a</i> | <i>miR-211</i>                  | <i>miR-376a</i>                 | 1 |
| <i>miR-181a</i> | <i>miR-451/144/4732 cluster</i> | <i>miR-29b</i>                  | 1 |
| <i>miR-181a</i> | <i>miR-489</i>                  | <i>miR-10b</i>                  | 1 |
| <i>miR-181c</i> | <i>let-7a</i>                   | <i>miR-181c</i>                 | 1 |
| <i>miR-181c</i> | <i>let-7b/miR-4763 cluster</i>  | <i>let-7c</i>                   | 1 |
| <i>miR-181c</i> | <i>let-7b/miR-4763 cluster</i>  | <i>miR-128b</i>                 | 1 |
| <i>miR-181c</i> | <i>let-7b/miR-4763 cluster</i>  | <i>miR-489</i>                  | 1 |
| <i>miR-181c</i> | <i>let-7c</i>                   | <i>miR-15b/16-2 cluster</i>     | 1 |
| <i>miR-181c</i> | <i>let-7c</i>                   | <i>miR-216</i>                  | 1 |
| <i>miR-181c</i> | <i>let-7d</i>                   | <i>miR-93/106b cluster</i>      | 1 |
| <i>miR-181c</i> | <i>let-7d</i>                   | <i>miR-188</i>                  | 1 |
| <i>miR-181c</i> | <i>miR-9-1</i>                  | <i>miR-199b/3154 cluster</i>    | 1 |
| <i>miR-181c</i> | <i>miR-9-1</i>                  | <i>miR-429</i>                  | 1 |
| <i>miR-181c</i> | <i>miR-16-1/15a cluster</i>     | <i>let-7c</i>                   | 1 |
| <i>miR-181c</i> | <i>miR-29b</i>                  | <i>miR-181a</i>                 | 1 |
| <i>miR-181c</i> | <i>miR-29b</i>                  | <i>miR-10b</i>                  | 1 |
| <i>miR-181c</i> | <i>miR-29c</i>                  | <i>miR-181c</i>                 | 1 |
| <i>miR-181c</i> | <i>miR-29c</i>                  | <i>miR-373</i>                  | 1 |
| <i>miR-181c</i> | <i>miR-99a</i>                  | <i>miR-488</i>                  | 1 |
| <i>miR-181c</i> | <i>miR-99a</i>                  | <i>miR-10b</i>                  | 1 |
| <i>miR-181c</i> | <i>let-7e/miR-99b cluster</i>   | <i>miR-212</i>                  | 1 |
| <i>miR-181c</i> | <i>miR-93/106b cluster</i>      | <i>let-7e/miR-99b cluster</i>   | 1 |
| <i>miR-181c</i> | <i>miR-129-2</i>                | <i>let-7a</i>                   | 1 |
| <i>miR-181c</i> | <i>miR-181c</i>                 | <i>miR-29a</i>                  | 1 |
| <i>miR-181c</i> | <i>miR-488</i>                  | <i>miR-324</i>                  | 1 |
| <i>miR-181c</i> | <i>miR-708</i>                  | <i>miR-708</i>                  | 1 |
| <i>miR-181c</i> | <i>let-7i</i>                   | <i>miR-24-2/27a/23a cluster</i> | 1 |
| <i>miR-181c</i> | <i>miR-15b/16-2 cluster</i>     | <i>miR-29a</i>                  | 1 |
| <i>miR-181c</i> | <i>miR-24-2/27a/23a cluster</i> | <i>let-7e/miR-99b cluster</i>   | 1 |
| <i>miR-181c</i> | <i>miR-24-2/27a/23a cluster</i> | <i>miR-129-2</i>                | 1 |
| <i>miR-181c</i> | <i>miR-24-2/27a/23a cluster</i> | <i>miR-196</i>                  | 1 |
| <i>miR-181c</i> | <i>miR-24-2/27a/23a cluster</i> | <i>miR-199b/3154 cluster</i>    | 1 |
| <i>miR-181c</i> | <i>miR-24-2/27a/23a cluster</i> | <i>miR-216</i>                  | 1 |
| <i>miR-181c</i> | <i>miR-24-2/27a/23a cluster</i> | <i>miR-10b</i>                  | 1 |
| <i>miR-181c</i> | <i>miR-196</i>                  | <i>miR-16-1/15a cluster</i>     | 1 |
| <i>miR-181c</i> | <i>miR-196</i>                  | <i>miR-99a</i>                  | 1 |
| <i>miR-181c</i> | <i>miR-196</i>                  | <i>let-7e/miR-99b cluster</i>   | 1 |
| <i>miR-181c</i> | <i>miR-199b/3154 cluster</i>    | <i>miR-34a</i>                  | 1 |
| <i>miR-181c</i> | <i>miR-199b/3154 cluster</i>    | <i>miR-99a</i>                  | 1 |
| <i>miR-181c</i> | <i>miR-211</i>                  | <i>miR-132</i>                  | 1 |
| <i>miR-181c</i> | <i>miR-328</i>                  | <i>miR-129-2</i>                | 1 |
| <i>miR-181c</i> | <i>miR-373</i>                  | <i>miR-129-2</i>                | 1 |
| <i>miR-181c</i> | <i>miR-429</i>                  | <i>let-7e/miR-99b cluster</i>   | 1 |
| <i>miR-181c</i> | <i>miR-451/144/4732 cluster</i> | <i>let-7b/miR-4763 cluster</i>  | 1 |
| <i>miR-181c</i> | <i>miR-489</i>                  | <i>miR-16-1/15a cluster</i>     | 1 |

|                 |                                 |                                 |   |
|-----------------|---------------------------------|---------------------------------|---|
| <i>miR-181c</i> | <i>miR-489</i>                  | <i>miR-196</i>                  | 1 |
| <i>miR-188</i>  | <i>miR-29a</i>                  | <i>miR-16-1/15a</i> cluster     | 1 |
| <i>miR-188</i>  | <i>miR-34a</i>                  | <i>miR-29a</i>                  | 1 |
| <i>miR-188</i>  | <i>miR-181c</i>                 | <i>miR-99a</i>                  | 1 |
| <i>miR-188</i>  | <i>miR-324</i>                  | <i>let-7i</i>                   | 1 |
| <i>miR-188</i>  | <i>miR-376a</i>                 | <i>miR-126</i>                  | 1 |
| <i>miR-188</i>  | <i>miR-376a</i>                 | <i>miR-328</i>                  | 1 |
| <i>miR-188</i>  | <i>miR-10b</i>                  | <i>miR-24-2/27a/23a</i> cluster | 1 |
| <i>miR-212</i>  | <i>let-7c</i>                   | <i>miR-451/144/4732</i> cluster | 1 |
| <i>miR-212</i>  | <i>miR-29a</i>                  | <i>miR-128b</i>                 | 1 |
| <i>miR-212</i>  | <i>miR-34a</i>                  | <i>let-7i</i>                   | 1 |
| <i>miR-212</i>  | <i>miR-93/106b</i> cluster      | <i>miR-376a</i>                 | 1 |
| <i>miR-212</i>  | <i>miR-128b</i>                 | <i>miR-128b</i>                 | 1 |
| <i>miR-212</i>  | <i>miR-181c</i>                 | <i>miR-29b</i>                  | 1 |
| <i>miR-212</i>  | <i>miR-324</i>                  | <i>miR-181a</i>                 | 1 |
| <i>miR-212</i>  | <i>miR-324</i>                  | <i>miR-181c</i>                 | 1 |
| <i>miR-212</i>  | <i>miR-324</i>                  | <i>miR-15b/16-2</i> cluster     | 1 |
| <i>miR-212</i>  | <i>miR-324</i>                  | <i>miR-31</i>                   | 1 |
| <i>miR-212</i>  | <i>miR-373</i>                  | <i>miR-128b</i>                 | 1 |
| <i>miR-212</i>  | <i>miR-429</i>                  | <i>miR-16-1/15a</i> cluster     | 1 |
| <i>miR-212</i>  | <i>miR-451/144/4732</i> cluster | <i>let-7a</i>                   | 1 |
| <i>miR-324</i>  | <i>let-7a</i>                   | <i>miR-24-2/27a/23a</i> cluster | 1 |
| <i>miR-324</i>  | <i>let-7a</i>                   | <i>miR-31</i>                   | 1 |
| <i>miR-324</i>  | <i>miR-9-1</i>                  | <i>miR-29a</i>                  | 1 |
| <i>miR-324</i>  | <i>miR-29b</i>                  | <i>miR-16-1/15a</i> cluster     | 1 |
| <i>miR-324</i>  | <i>miR-128b</i>                 | <i>let-7c</i>                   | 1 |
| <i>miR-324</i>  | <i>miR-324</i>                  | <i>let-7c</i>                   | 1 |
| <i>miR-324</i>  | <i>miR-324</i>                  | <i>miR-99a</i>                  | 1 |
| <i>miR-324</i>  | <i>miR-376a</i>                 | <i>let-7d</i>                   | 1 |
| <i>miR-324</i>  | <i>miR-15b/16-2</i> cluster     | <i>miR-181a</i>                 | 1 |
| <i>miR-324</i>  | <i>miR-31</i>                   | <i>miR-212</i>                  | 1 |
| <i>miR-324</i>  | <i>miR-126</i>                  | <i>let-7i</i>                   | 1 |
| <i>miR-324</i>  | <i>miR-216</i>                  | <i>miR-128b</i>                 | 1 |
| <i>miR-324</i>  | <i>miR-373</i>                  | <i>miR-31</i>                   | 1 |
| <i>miR-324</i>  | <i>miR-429</i>                  | <i>let-7e/miR-99b</i> cluster   | 1 |
| <i>miR-324</i>  | <i>miR-451/144/4732</i> cluster | <i>miR-24-2/27a/23a</i> cluster | 1 |
| <i>miR-324</i>  | <i>miR-451/144/4732</i> cluster | <i>miR-126</i>                  | 1 |
| <i>miR-324</i>  | <i>miR-10b</i>                  | <i>miR-376a</i>                 | 1 |
| <i>miR-324</i>  | <i>miR-10b</i>                  | <i>miR-15b/16-2</i> cluster     | 1 |
| <i>miR-376a</i> | <i>let-7b/miR-4763</i> cluster  | <i>miR-181a</i>                 | 1 |
| <i>miR-376a</i> | <i>miR-16-1/15a</i> cluster     | <i>miR-24-2/27a/23a</i> cluster | 1 |
| <i>miR-376a</i> | <i>miR-16-1/15a</i> cluster     | <i>miR-211</i>                  | 1 |
| <i>miR-376a</i> | <i>miR-29a</i>                  | <i>miR-31</i>                   | 1 |
| <i>miR-376a</i> | <i>miR-128b</i>                 | <i>miR-10b</i>                  | 1 |
| <i>miR-376a</i> | <i>miR-181c</i>                 | <i>let-7c</i>                   | 1 |
| <i>miR-376a</i> | <i>miR-324</i>                  | <i>miR-376a</i>                 | 1 |
| <i>miR-376a</i> | <i>miR-376a</i>                 | <i>miR-199b/3154</i> cluster    | 1 |
| <i>miR-376a</i> | <i>miR-15b/16-2</i> cluster     | <i>let-7c</i>                   | 1 |
| <i>miR-376a</i> | <i>miR-15b/16-2</i> cluster     | <i>miR-181c</i>                 | 1 |
| <i>miR-376a</i> | <i>miR-31</i>                   | <i>miR-16-1/15a</i> cluster     | 1 |
| <i>miR-376a</i> | <i>miR-196</i>                  | <i>miR-181c</i>                 | 1 |
| <i>miR-376a</i> | <i>miR-373</i>                  | <i>let-7i</i>                   | 1 |
| <i>miR-376a</i> | <i>miR-373</i>                  | <i>miR-451/144/4732</i> cluster | 1 |

|                             |                                 |                                 |   |
|-----------------------------|---------------------------------|---------------------------------|---|
| <i>miR-376a</i>             | <i>miR-489</i>                  | <i>miR-29a</i>                  | 1 |
| <i>miR-376a</i>             | <i>miR-489</i>                  | <i>miR-211</i>                  | 1 |
| <i>miR-376a</i>             | <i>miR-10b</i>                  | <i>miR-708</i>                  | 1 |
| <i>miR-488</i>              | <i>miR-29a</i>                  | <i>miR-451/144/4732 cluster</i> | 1 |
| <i>miR-488</i>              | <i>miR-29a</i>                  | <i>miR-10b</i>                  | 1 |
| <i>miR-488</i>              | <i>miR-128b</i>                 | <i>miR-181c</i>                 | 1 |
| <i>miR-488</i>              | <i>miR-181c</i>                 | <i>miR-181a</i>                 | 1 |
| <i>miR-488</i>              | <i>let-7i</i>                   | <i>miR-29b</i>                  | 1 |
| <i>miR-488</i>              | <i>miR-451/144/4732 cluster</i> | <i>miR-181c</i>                 | 1 |
| <i>miR-708</i>              | <i>miR-16-1/15a cluster</i>     | <i>let-7c</i>                   | 1 |
| <i>miR-708</i>              | <i>miR-16-1/15a cluster</i>     | <i>miR-181c</i>                 | 1 |
| <i>miR-708</i>              | <i>miR-29a</i>                  | <i>miR-126</i>                  | 1 |
| <i>miR-708</i>              | <i>miR-128b</i>                 | <i>miR-211</i>                  | 1 |
| <i>miR-708</i>              | <i>miR-181a</i>                 | <i>miR-15b/16-2 cluster</i>     | 1 |
| <i>miR-708</i>              | <i>miR-181c</i>                 | <i>let-7a</i>                   | 1 |
| <i>miR-708</i>              | <i>miR-181c</i>                 | <i>miR-31</i>                   | 1 |
| <i>miR-708</i>              | <i>miR-376a</i>                 | <i>miR-29b</i>                  | 1 |
| <i>miR-708</i>              | <i>miR-376a</i>                 | <i>miR-128b</i>                 | 1 |
| <i>miR-708</i>              | <i>miR-708</i>                  | <i>miR-181c</i>                 | 1 |
| <i>miR-708</i>              | <i>miR-15b/16-2 cluster</i>     | <i>miR-10b</i>                  | 1 |
| <i>miR-708</i>              | <i>miR-126</i>                  | <i>miR-31</i>                   | 1 |
| <i>miR-708</i>              | <i>miR-373</i>                  | <i>miR-181c</i>                 | 1 |
| <i>miR-708</i>              | <i>miR-451/144/4732 cluster</i> | <i>miR-31</i>                   | 1 |
| <i>miR-708</i>              | <i>miR-10b</i>                  | <i>miR-181c</i>                 | 1 |
| <i>let-7i</i>               | <i>miR-9-1</i>                  | <i>miR-128b</i>                 | 1 |
| <i>let-7i</i>               | <i>miR-9-1</i>                  | <i>miR-181c</i>                 | 1 |
| <i>let-7i</i>               | <i>miR-16-1/15a cluster</i>     | <i>miR-16-1/15a cluster</i>     | 1 |
| <i>let-7i</i>               | <i>miR-16-1/15a cluster</i>     | <i>miR-181c</i>                 | 1 |
| <i>let-7i</i>               | <i>miR-29a</i>                  | <i>miR-93/106b cluster</i>      | 1 |
| <i>let-7i</i>               | <i>miR-29a</i>                  | <i>miR-181c</i>                 | 1 |
| <i>let-7i</i>               | <i>miR-34a</i>                  | <i>miR-181c</i>                 | 1 |
| <i>let-7i</i>               | <i>miR-34a</i>                  | <i>miR-324</i>                  | 1 |
| <i>let-7i</i>               | <i>miR-128b</i>                 | <i>miR-376a</i>                 | 1 |
| <i>let-7i</i>               | <i>miR-181c</i>                 | <i>miR-93/106b cluster</i>      | 1 |
| <i>let-7i</i>               | <i>miR-212</i>                  | <i>miR-29b</i>                  | 1 |
| <i>let-7i</i>               | <i>miR-324</i>                  | <i>miR-128b</i>                 | 1 |
| <i>let-7i</i>               | <i>miR-324</i>                  | <i>miR-211</i>                  | 1 |
| <i>let-7i</i>               | <i>miR-376a</i>                 | <i>miR-34a</i>                  | 1 |
| <i>let-7i</i>               | <i>miR-376a</i>                 | <i>let-7i</i>                   | 1 |
| <i>let-7i</i>               | <i>miR-376a</i>                 | <i>miR-15b/16-2 cluster</i>     | 1 |
| <i>let-7i</i>               | <i>miR-708</i>                  | <i>miR-373</i>                  | 1 |
| <i>let-7i</i>               | <i>miR-31</i>                   | <i>miR-34a</i>                  | 1 |
| <i>let-7i</i>               | <i>miR-196</i>                  | <i>miR-15b/16-2 cluster</i>     | 1 |
| <i>let-7i</i>               | <i>miR-216</i>                  | <i>miR-29b</i>                  | 1 |
| <i>let-7i</i>               | <i>miR-216</i>                  | <i>miR-181c</i>                 | 1 |
| <i>let-7i</i>               | <i>miR-373</i>                  | <i>let-7d</i>                   | 1 |
| <i>let-7i</i>               | <i>miR-373</i>                  | <i>miR-708</i>                  | 1 |
| <i>miR-15b/16-2 cluster</i> | <i>miR-9-1</i>                  | <i>miR-31</i>                   | 1 |
| <i>miR-15b/16-2 cluster</i> | <i>miR-16-1/15a cluster</i>     | <i>miR-99a</i>                  | 1 |
| <i>miR-15b/16-2 cluster</i> | <i>miR-16-1/15a cluster</i>     | <i>miR-31</i>                   | 1 |
| <i>miR-15b/16-2 cluster</i> | <i>miR-29a</i>                  | <i>miR-212</i>                  | 1 |
| <i>miR-15b/16-2 cluster</i> | <i>miR-29b</i>                  | <i>miR-10b</i>                  | 1 |
| <i>miR-15b/16-2 cluster</i> | <i>miR-29c</i>                  | <i>miR-29a</i>                  | 1 |

|                                 |                                 |                                 |   |
|---------------------------------|---------------------------------|---------------------------------|---|
| <i>miR-15b/16-2 cluster</i>     | <i>miR-29c</i>                  | <i>let-7e/miR-99b cluster</i>   | 1 |
| <i>miR-15b/16-2 cluster</i>     | <i>miR-34a</i>                  | <i>miR-10b</i>                  | 1 |
| <i>miR-15b/16-2 cluster</i>     | <i>miR-93/106b cluster</i>      | <i>miR-16-1/15a cluster</i>     | 1 |
| <i>miR-15b/16-2 cluster</i>     | <i>miR-128b</i>                 | <i>miR-126</i>                  | 1 |
| <i>miR-15b/16-2 cluster</i>     | <i>miR-129-2</i>                | <i>miR-31</i>                   | 1 |
| <i>miR-15b/16-2 cluster</i>     | <i>miR-181a</i>                 | <i>miR-129-2</i>                | 1 |
| <i>miR-15b/16-2 cluster</i>     | <i>miR-181a</i>                 | <i>miR-126</i>                  | 1 |
| <i>miR-15b/16-2 cluster</i>     | <i>miR-181c</i>                 | <i>miR-324</i>                  | 1 |
| <i>miR-15b/16-2 cluster</i>     | <i>miR-324</i>                  | <i>let-7c</i>                   | 1 |
| <i>miR-15b/16-2 cluster</i>     | <i>miR-324</i>                  | <i>miR-16-1/15a cluster</i>     | 1 |
| <i>miR-15b/16-2 cluster</i>     | <i>miR-376a</i>                 | <i>miR-126</i>                  | 1 |
| <i>miR-15b/16-2 cluster</i>     | <i>miR-488</i>                  | <i>miR-181c</i>                 | 1 |
| <i>miR-15b/16-2 cluster</i>     | <i>miR-708</i>                  | <i>miR-324</i>                  | 1 |
| <i>miR-15b/16-2 cluster</i>     | <i>let-7i</i>                   | <i>miR-216</i>                  | 1 |
| <i>miR-15b/16-2 cluster</i>     | <i>let-7i</i>                   | <i>miR-10b</i>                  | 1 |
| <i>miR-15b/16-2 cluster</i>     | <i>miR-15b/16-2 cluster</i>     | <i>miR-451/144/4732 cluster</i> | 1 |
| <i>miR-15b/16-2 cluster</i>     | <i>miR-31</i>                   | <i>miR-31</i>                   | 1 |
| <i>miR-15b/16-2 cluster</i>     | <i>miR-31</i>                   | <i>miR-196</i>                  | 1 |
| <i>miR-15b/16-2 cluster</i>     | <i>miR-126</i>                  | <i>miR-29a</i>                  | 1 |
| <i>miR-15b/16-2 cluster</i>     | <i>miR-126</i>                  | <i>miR-128b</i>                 | 1 |
| <i>miR-15b/16-2 cluster</i>     | <i>miR-196</i>                  | <i>miR-10b</i>                  | 1 |
| <i>miR-15b/16-2 cluster</i>     | <i>miR-199b/3154 cluster</i>    | <i>let-7i</i>                   | 1 |
| <i>miR-15b/16-2 cluster</i>     | <i>miR-211</i>                  | <i>miR-376a</i>                 | 1 |
| <i>miR-15b/16-2 cluster</i>     | <i>miR-373</i>                  | <i>miR-128b</i>                 | 1 |
| <i>miR-15b/16-2 cluster</i>     | <i>miR-373</i>                  | <i>miR-451/144/4732 cluster</i> | 1 |
| <i>miR-15b/16-2 cluster</i>     | <i>miR-489</i>                  | <i>let-7c</i>                   | 1 |
| <i>miR-15b/16-2 cluster</i>     | <i>miR-489</i>                  | <i>let-7e/miR-99b cluster</i>   | 1 |
| <i>miR-15b/16-2 cluster</i>     | <i>miR-489</i>                  | <i>miR-211</i>                  | 1 |
| <i>miR-15b/16-2 cluster</i>     | <i>miR-489</i>                  | <i>miR-373</i>                  | 1 |
| <i>miR-15b/16-2 cluster</i>     | <i>miR-489</i>                  | <i>miR-10b</i>                  | 1 |
| <i>miR-15b/16-2 cluster</i>     | <i>miR-10b</i>                  | <i>miR-196</i>                  | 1 |
| <i>miR-15b/16-2 cluster</i>     | <i>miR-10b</i>                  | <i>miR-373</i>                  | 1 |
| <i>miR-24-2/27a/23a cluster</i> | <i>let-7c</i>                   | <i>miR-489</i>                  | 1 |
| <i>miR-24-2/27a/23a cluster</i> | <i>miR-29a</i>                  | <i>miR-31</i>                   | 1 |
| <i>miR-24-2/27a/23a cluster</i> | <i>miR-29a</i>                  | <i>miR-211</i>                  | 1 |
| <i>miR-24-2/27a/23a cluster</i> | <i>miR-29a</i>                  | <i>miR-373</i>                  | 1 |
| <i>miR-24-2/27a/23a cluster</i> | <i>let-7e/miR-99b cluster</i>   | <i>miR-429</i>                  | 1 |
| <i>miR-24-2/27a/23a cluster</i> | <i>miR-93/106b cluster</i>      | <i>miR-128b</i>                 | 1 |
| <i>miR-24-2/27a/23a cluster</i> | <i>miR-132</i>                  | <i>miR-31</i>                   | 1 |
| <i>miR-24-2/27a/23a cluster</i> | <i>miR-324</i>                  | <i>miR-181c</i>                 | 1 |
| <i>miR-24-2/27a/23a cluster</i> | <i>let-7i</i>                   | <i>miR-181c</i>                 | 1 |
| <i>miR-24-2/27a/23a cluster</i> | <i>let-7i</i>                   | <i>miR-10b</i>                  | 1 |
| <i>miR-24-2/27a/23a cluster</i> | <i>miR-15b/16-2 cluster</i>     | <i>miR-15b/16-2 cluster</i>     | 1 |
| <i>miR-24-2/27a/23a cluster</i> | <i>miR-211</i>                  | <i>miR-199b/3154 cluster</i>    | 1 |
| <i>miR-24-2/27a/23a cluster</i> | <i>miR-216</i>                  | <i>miR-34a</i>                  | 1 |
| <i>miR-24-2/27a/23a cluster</i> | <i>miR-451/144/4732 cluster</i> | <i>miR-128b</i>                 | 1 |
| <i>miR-24-2/27a/23a cluster</i> | <i>miR-10b</i>                  | <i>miR-199b/3154 cluster</i>    | 1 |
| <i>miR-31</i>                   | <i>let-7c</i>                   | <i>let-7i</i>                   | 1 |
| <i>miR-31</i>                   | <i>miR-16-1/15a cluster</i>     | <i>let-7d</i>                   | 1 |
| <i>miR-31</i>                   | <i>miR-29a</i>                  | <i>let-7a</i>                   | 1 |
| <i>miR-31</i>                   | <i>miR-29a</i>                  | <i>let-7e/miR-99b cluster</i>   | 1 |
| <i>miR-31</i>                   | <i>miR-29c</i>                  | <i>miR-181c</i>                 | 1 |
| <i>miR-31</i>                   | <i>miR-29c</i>                  | <i>miR-15b/16-2 cluster</i>     | 1 |

|                              |                               |                                 |   |
|------------------------------|-------------------------------|---------------------------------|---|
| <i>miR-31</i>                | <i>miR-99a</i>                | <i>miR-128b</i>                 | 1 |
| <i>miR-31</i>                | <i>miR-99a</i>                | <i>miR-181c</i>                 | 1 |
| <i>miR-31</i>                | <i>let-7e/miR-99b</i> cluster | <i>let-7a</i>                   | 1 |
| <i>miR-31</i>                | <i>let-7e/miR-99b</i> cluster | <i>miR-10b</i>                  | 1 |
| <i>miR-31</i>                | <i>miR-128b</i>               | <i>let-7b/miR-4763</i> cluster  | 1 |
| <i>miR-31</i>                | <i>miR-128b</i>               | <i>miR-29b</i>                  | 1 |
| <i>miR-31</i>                | <i>miR-128b</i>               | <i>miR-31</i>                   | 1 |
| <i>miR-31</i>                | <i>miR-188</i>                | <i>let-7d</i>                   | 1 |
| <i>miR-31</i>                | <i>miR-324</i>                | <i>miR-211</i>                  | 1 |
| <i>miR-31</i>                | <i>miR-324</i>                | <i>miR-489</i>                  | 1 |
| <i>miR-31</i>                | <i>miR-324</i>                | <i>miR-10b</i>                  | 1 |
| <i>miR-31</i>                | <i>miR-376a</i>               | <i>miR-34a</i>                  | 1 |
| <i>miR-31</i>                | <i>miR-15b/16-2</i> cluster   | <i>miR-376a</i>                 | 1 |
| <i>miR-31</i>                | <i>miR-15b/16-2</i> cluster   | <i>miR-10b</i>                  | 1 |
| <i>miR-31</i>                | <i>miR-31</i>                 | <i>miR-93/106b</i> cluster      | 1 |
| <i>miR-31</i>                | <i>miR-199b/3154</i> cluster  | <i>miR-324</i>                  | 1 |
| <i>miR-31</i>                | <i>miR-211</i>                | <i>miR-324</i>                  | 1 |
| <i>miR-31</i>                | <i>miR-211</i>                | <i>miR-31</i>                   | 1 |
| <i>miR-31</i>                | <i>miR-489</i>                | <i>miR-9-1</i>                  | 1 |
| <i>miR-31</i>                | <i>miR-10b</i>                | <i>miR-29b</i>                  | 1 |
| <i>miR-31</i>                | <i>miR-10b</i>                | <i>miR-324</i>                  | 1 |
| <i>miR-31</i>                | <i>miR-10b</i>                | <i>miR-488</i>                  | 1 |
| <i>miR-126</i>               | <i>let-7c</i>                 | <i>miR-31</i>                   | 1 |
| <i>miR-126</i>               | <i>miR-9-1</i>                | <i>miR-10b</i>                  | 1 |
| <i>miR-126</i>               | <i>let-7e/miR-99b</i> cluster | <i>miR-376a</i>                 | 1 |
| <i>miR-126</i>               | <i>miR-93/106b</i> cluster    | <i>miR-376a</i>                 | 1 |
| <i>miR-126</i>               | <i>miR-181a</i>               | <i>miR-128b</i>                 | 1 |
| <i>miR-126</i>               | <i>miR-181c</i>               | <i>miR-328</i>                  | 1 |
| <i>miR-126</i>               | <i>let-7i</i>                 | <i>miR-10b</i>                  | 1 |
| <i>miR-126</i>               | <i>miR-15b/16-2</i> cluster   | <i>miR-128b</i>                 | 1 |
| <i>miR-126</i>               | <i>miR-31</i>                 | <i>miR-181c</i>                 | 1 |
| <i>miR-126</i>               | <i>miR-31</i>                 | <i>miR-10b</i>                  | 1 |
| <i>miR-126</i>               | <i>miR-196</i>                | <i>miR-373</i>                  | 1 |
| <i>miR-196</i>               | <i>let-7c</i>                 | <i>let-7i</i>                   | 1 |
| <i>miR-196</i>               | <i>let-7d</i>                 | <i>miR-181a</i>                 | 1 |
| <i>miR-196</i>               | <i>miR-16-1/15a</i> cluster   | <i>miR-488</i>                  | 1 |
| <i>miR-196</i>               | <i>miR-16-1/15a</i> cluster   | <i>miR-216</i>                  | 1 |
| <i>miR-196</i>               | <i>miR-29b</i>                | <i>miR-10b</i>                  | 1 |
| <i>miR-196</i>               | <i>miR-128b</i>               | <i>miR-128b</i>                 | 1 |
| <i>miR-196</i>               | <i>miR-181a</i>               | <i>let-7d</i>                   | 1 |
| <i>miR-196</i>               | <i>miR-181c</i>               | <i>miR-211</i>                  | 1 |
| <i>miR-196</i>               | <i>miR-376a</i>               | <i>miR-29a</i>                  | 1 |
| <i>miR-196</i>               | <i>miR-488</i>                | <i>miR-181a</i>                 | 1 |
| <i>miR-196</i>               | <i>let-7i</i>                 | <i>miR-324</i>                  | 1 |
| <i>miR-196</i>               | <i>miR-31</i>                 | <i>miR-16-1/15a</i> cluster     | 1 |
| <i>miR-196</i>               | <i>miR-211</i>                | <i>miR-181c</i>                 | 1 |
| <i>miR-196</i>               | <i>miR-489</i>                | <i>miR-29b</i>                  | 1 |
| <i>miR-199b/3154</i> cluster | <i>miR-16-1/15a</i> cluster   | <i>miR-29b</i>                  | 1 |
| <i>miR-199b/3154</i> cluster | <i>miR-16-1/15a</i> cluster   | <i>miR-451/144/4732</i> cluster | 1 |
| <i>miR-199b/3154</i> cluster | <i>miR-128b</i>               | <i>miR-24-2/27a/23a</i> cluster | 1 |
| <i>miR-199b/3154</i> cluster | <i>miR-132</i>                | <i>miR-31</i>                   | 1 |
| <i>miR-199b/3154</i> cluster | <i>miR-324</i>                | <i>miR-429</i>                  | 1 |
| <i>miR-199b/3154</i> cluster | <i>miR-376a</i>               | <i>let-7a</i>                   | 1 |



|                              |                                 |                                 |   |
|------------------------------|---------------------------------|---------------------------------|---|
| <i>miR-199b/3154</i> cluster | <i>miR-376a</i>                 | <i>miR-34a</i>                  | 1 |
| <i>miR-199b/3154</i> cluster | <i>miR-376a</i>                 | <i>miR-708</i>                  | 1 |
| <i>miR-199b/3154</i> cluster | <i>let-7i</i>                   | <i>miR-16-1/15a</i> cluster     | 1 |
| <i>miR-199b/3154</i> cluster | <i>miR-15b/16-2</i> cluster     | <i>miR-708</i>                  | 1 |
| <i>miR-199b/3154</i> cluster | <i>miR-196</i>                  | <i>miR-181c</i>                 | 1 |
| <i>miR-199b/3154</i> cluster | <i>miR-199b/3154</i> cluster    | <i>miR-16-1/15a</i> cluster     | 1 |
| <i>miR-199b/3154</i> cluster | <i>miR-10b</i>                  | <i>miR-16-1/15a</i> cluster     | 1 |
| <i>miR-199b/3154</i> cluster | <i>miR-10b</i>                  | <i>miR-126</i>                  | 1 |
| <i>miR-211</i>               | <i>let-7c</i>                   | <i>miR-24-2/27a/23a</i> cluster | 1 |
| <i>miR-211</i>               | <i>miR-29a</i>                  | <i>miR-29a</i>                  | 1 |
| <i>miR-211</i>               | <i>miR-29a</i>                  | <i>miR-34a</i>                  | 1 |
| <i>miR-211</i>               | <i>miR-29c</i>                  | <i>miR-451/144/4732</i> cluster | 1 |
| <i>miR-211</i>               | <i>let-7e/miR-99b</i> cluster   | <i>miR-181c</i>                 | 1 |
| <i>miR-211</i>               | <i>miR-128b</i>                 | <i>miR-15b/16-2</i> cluster     | 1 |
| <i>miR-211</i>               | <i>miR-132</i>                  | <i>miR-181a</i>                 | 1 |
| <i>miR-211</i>               | <i>miR-181c</i>                 | <i>miR-708</i>                  | 1 |
| <i>miR-211</i>               | <i>miR-488</i>                  | <i>miR-181a</i>                 | 1 |
| <i>miR-211</i>               | <i>miR-488</i>                  | <i>miR-324</i>                  | 1 |
| <i>miR-211</i>               | <i>miR-708</i>                  | <i>miR-376a</i>                 | 1 |
| <i>miR-211</i>               | <i>let-7i</i>                   | <i>miR-429</i>                  | 1 |
| <i>miR-211</i>               | <i>miR-15b/16-2</i> cluster     | <i>let-7e/miR-99b</i> cluster   | 1 |
| <i>miR-211</i>               | <i>miR-31</i>                   | <i>let-7a</i>                   | 1 |
| <i>miR-211</i>               | <i>miR-31</i>                   | <i>miR-16-1/15a</i> cluster     | 1 |
| <i>miR-211</i>               | <i>miR-489</i>                  | <i>miR-31</i>                   | 1 |
| <i>miR-211</i>               | <i>miR-10b</i>                  | <i>let-7c</i>                   | 1 |
| <i>miR-216</i>               | <i>miR-16-1/15a</i> cluster     | <i>miR-188</i>                  | 1 |
| <i>miR-216</i>               | <i>miR-16-1/15a</i> cluster     | <i>miR-429</i>                  | 1 |
| <i>miR-216</i>               | <i>miR-29a</i>                  | <i>miR-216</i>                  | 1 |
| <i>miR-216</i>               | <i>miR-99a</i>                  | <i>miR-31</i>                   | 1 |
| <i>miR-216</i>               | <i>miR-128b</i>                 | <i>let-7i</i>                   | 1 |
| <i>miR-216</i>               | <i>miR-128b</i>                 | <i>miR-10b</i>                  | 1 |
| <i>miR-216</i>               | <i>miR-181a</i>                 | <i>miR-451/144/4732</i> cluster | 1 |
| <i>miR-216</i>               | <i>miR-324</i>                  | <i>miR-373</i>                  | 1 |
| <i>miR-216</i>               | <i>miR-376a</i>                 | <i>miR-181c</i>                 | 1 |
| <i>miR-216</i>               | <i>miR-376a</i>                 | <i>miR-10b</i>                  | 1 |
| <i>miR-216</i>               | <i>miR-24-2/27a/23a</i> cluster | <i>let-7i</i>                   | 1 |
| <i>miR-216</i>               | <i>miR-31</i>                   | <i>let-7i</i>                   | 1 |
| <i>miR-216</i>               | <i>miR-31</i>                   | <i>miR-15b/16-2</i> cluster     | 1 |
| <i>miR-216</i>               | <i>miR-31</i>                   | <i>miR-31</i>                   | 1 |
| <i>miR-216</i>               | <i>miR-211</i>                  | <i>miR-376a</i>                 | 1 |
| <i>miR-216</i>               | <i>miR-489</i>                  | <i>miR-10b</i>                  | 1 |
| <i>miR-216</i>               | <i>miR-10b</i>                  | <i>miR-99a</i>                  | 1 |
| <i>miR-216</i>               | <i>miR-10b</i>                  | <i>miR-181a</i>                 | 1 |
| <i>miR-328</i>               | <i>let-7a</i>                   | <i>miR-196</i>                  | 1 |
| <i>miR-328</i>               | <i>let-7c</i>                   | <i>miR-16-1/15a</i> cluster     | 1 |
| <i>miR-328</i>               | <i>let-7c</i>                   | <i>miR-181a</i>                 | 1 |
| <i>miR-328</i>               | <i>let-7c</i>                   | <i>miR-181c</i>                 | 1 |
| <i>miR-328</i>               | <i>miR-128b</i>                 | <i>miR-132</i>                  | 1 |
| <i>miR-328</i>               | <i>miR-181c</i>                 | <i>miR-93/106b</i> cluster      | 1 |
| <i>miR-328</i>               | <i>miR-181c</i>                 | <i>miR-188</i>                  | 1 |
| <i>miR-328</i>               | <i>miR-324</i>                  | <i>miR-211</i>                  | 1 |
| <i>miR-328</i>               | <i>miR-376a</i>                 | <i>miR-128b</i>                 | 1 |
| <i>miR-328</i>               | <i>miR-376a</i>                 | <i>miR-196</i>                  | 1 |



|                                 |                                 |                                 |   |
|---------------------------------|---------------------------------|---------------------------------|---|
| <i>miR-328</i>                  | <i>miR-31</i>                   | <i>miR-429</i>                  | 1 |
| <i>miR-328</i>                  | <i>miR-211</i>                  | <i>miR-16-1/15a</i> cluster     | 1 |
| <i>miR-328</i>                  | <i>miR-373</i>                  | <i>miR-324</i>                  | 1 |
| <i>miR-328</i>                  | <i>miR-489</i>                  | <i>let-7d</i>                   | 1 |
| <i>miR-328</i>                  | <i>miR-10b</i>                  | <i>miR-29c</i>                  | 1 |
| <i>miR-328</i>                  | <i>miR-10b</i>                  | <i>miR-216</i>                  | 1 |
| <i>miR-373</i>                  | <i>miR-29a</i>                  | <i>miR-16-1/15a</i> cluster     | 1 |
| <i>miR-373</i>                  | <i>miR-128b</i>                 | <i>miR-181c</i>                 | 1 |
| <i>miR-373</i>                  | <i>miR-181c</i>                 | <i>let-7d</i>                   | 1 |
| <i>miR-373</i>                  | <i>miR-188</i>                  | <i>miR-429</i>                  | 1 |
| <i>miR-373</i>                  | <i>miR-376a</i>                 | <i>let-7b/miR-4763</i> cluster  | 1 |
| <i>miR-373</i>                  | <i>miR-376a</i>                 | <i>miR-708</i>                  | 1 |
| <i>miR-373</i>                  | <i>miR-376a</i>                 | <i>miR-126</i>                  | 1 |
| <i>miR-373</i>                  | <i>miR-488</i>                  | <i>miR-29a</i>                  | 1 |
| <i>miR-373</i>                  | <i>let-7i</i>                   | <i>miR-24-2/27a/23a</i> cluster | 1 |
| <i>miR-373</i>                  | <i>let-7i</i>                   | <i>miR-328</i>                  | 1 |
| <i>miR-373</i>                  | <i>miR-15b/16-2</i> cluster     | <i>miR-324</i>                  | 1 |
| <i>miR-373</i>                  | <i>miR-24-2/27a/23a</i> cluster | <i>miR-181c</i>                 | 1 |
| <i>miR-373</i>                  | <i>miR-31</i>                   | <i>miR-16-1/15a</i> cluster     | 1 |
| <i>miR-373</i>                  | <i>miR-31</i>                   | <i>miR-29a</i>                  | 1 |
| <i>miR-373</i>                  | <i>miR-429</i>                  | <i>let-7e/miR-99b</i> cluster   | 1 |
| <i>miR-373</i>                  | <i>miR-429</i>                  | <i>miR-376a</i>                 | 1 |
| <i>miR-373</i>                  | <i>miR-451/144/4732</i> cluster | <i>miR-10b</i>                  | 1 |
| <i>miR-373</i>                  | <i>miR-10b</i>                  | <i>miR-212</i>                  | 1 |
| <i>miR-429</i>                  | <i>let-7c</i>                   | <i>miR-9-1</i>                  | 1 |
| <i>miR-429</i>                  | <i>let-7d</i>                   | <i>miR-31</i>                   | 1 |
| <i>miR-429</i>                  | <i>miR-16-1/15a</i> cluster     | <i>miR-489</i>                  | 1 |
| <i>miR-429</i>                  | <i>miR-29a</i>                  | <i>miR-181a</i>                 | 1 |
| <i>miR-429</i>                  | <i>miR-29a</i>                  | <i>miR-488</i>                  | 1 |
| <i>miR-429</i>                  | <i>miR-29a</i>                  | <i>miR-211</i>                  | 1 |
| <i>miR-429</i>                  | <i>miR-29b</i>                  | <i>miR-10b</i>                  | 1 |
| <i>miR-429</i>                  | <i>miR-99a</i>                  | <i>miR-29b</i>                  | 1 |
| <i>miR-429</i>                  | <i>miR-99a</i>                  | <i>miR-376a</i>                 | 1 |
| <i>miR-429</i>                  | <i>miR-132</i>                  | <i>miR-181c</i>                 | 1 |
| <i>miR-429</i>                  | <i>miR-181c</i>                 | <i>miR-29b</i>                  | 1 |
| <i>miR-429</i>                  | <i>miR-324</i>                  | <i>miR-126</i>                  | 1 |
| <i>miR-429</i>                  | <i>miR-376a</i>                 | <i>let-7d</i>                   | 1 |
| <i>miR-429</i>                  | <i>let-7i</i>                   | <i>let-7c</i>                   | 1 |
| <i>miR-429</i>                  | <i>miR-15b/16-2</i> cluster     | <i>miR-489</i>                  | 1 |
| <i>miR-429</i>                  | <i>miR-24-2/27a/23a</i> cluster | <i>miR-181a</i>                 | 1 |
| <i>miR-429</i>                  | <i>miR-31</i>                   | <i>miR-10b</i>                  | 1 |
| <i>miR-429</i>                  | <i>miR-199b/3154</i> cluster    | <i>miR-10b</i>                  | 1 |
| <i>miR-429</i>                  | <i>miR-211</i>                  | <i>miR-181c</i>                 | 1 |
| <i>miR-429</i>                  | <i>miR-10b</i>                  | <i>let-7c</i>                   | 1 |
| <i>miR-451/144/4732</i> cluster | <i>let-7a</i>                   | <i>miR-489</i>                  | 1 |
| <i>miR-451/144/4732</i> cluster | <i>let-7c</i>                   | <i>miR-376a</i>                 | 1 |
| <i>miR-451/144/4732</i> cluster | <i>let-7d</i>                   | <i>miR-31</i>                   | 1 |
| <i>miR-451/144/4732</i> cluster | <i>miR-16-1/15a</i> cluster     | <i>let-7i</i>                   | 1 |
| <i>miR-451/144/4732</i> cluster | <i>miR-16-1/15a</i> cluster     | <i>miR-15b/16-2</i> cluster     | 1 |
| <i>miR-451/144/4732</i> cluster | <i>miR-29a</i>                  | <i>let-7c</i>                   | 1 |
| <i>miR-451/144/4732</i> cluster | <i>miR-29c</i>                  | <i>miR-29a</i>                  | 1 |
| <i>miR-451/144/4732</i> cluster | <i>miR-34a</i>                  | <i>miR-181a</i>                 | 1 |
| <i>miR-451/144/4732</i> cluster | <i>miR-34a</i>                  | <i>miR-376a</i>                 | 1 |

|                                 |                                 |                                 |   |
|---------------------------------|---------------------------------|---------------------------------|---|
| <i>miR-451/144/4732 cluster</i> | <i>miR-99a</i>                  | <i>miR-181c</i>                 | 1 |
| <i>miR-451/144/4732 cluster</i> | <i>let-7e/miR-99b cluster</i>   | <i>miR-324</i>                  | 1 |
| <i>miR-451/144/4732 cluster</i> | <i>miR-128b</i>                 | <i>miR-216</i>                  | 1 |
| <i>miR-451/144/4732 cluster</i> | <i>miR-181c</i>                 | <i>miR-188</i>                  | 1 |
| <i>miR-451/144/4732 cluster</i> | <i>miR-188</i>                  | <i>miR-181c</i>                 | 1 |
| <i>miR-451/144/4732 cluster</i> | <i>miR-188</i>                  | <i>miR-196</i>                  | 1 |
| <i>miR-451/144/4732 cluster</i> | <i>miR-376a</i>                 | <i>miR-328</i>                  | 1 |
| <i>miR-451/144/4732 cluster</i> | <i>miR-488</i>                  | <i>miR-128b</i>                 | 1 |
| <i>miR-451/144/4732 cluster</i> | <i>miR-708</i>                  | <i>miR-10b</i>                  | 1 |
| <i>miR-451/144/4732 cluster</i> | <i>let-7i</i>                   | <i>miR-188</i>                  | 1 |
| <i>miR-451/144/4732 cluster</i> | <i>miR-24-2/27a/23a cluster</i> | <i>miR-99a</i>                  | 1 |
| <i>miR-451/144/4732 cluster</i> | <i>miR-24-2/27a/23a cluster</i> | <i>miR-199b/3154 cluster</i>    | 1 |
| <i>miR-451/144/4732 cluster</i> | <i>miR-216</i>                  | <i>miR-451/144/4732 cluster</i> | 1 |
| <i>miR-451/144/4732 cluster</i> | <i>miR-328</i>                  | <i>miR-24-2/27a/23a cluster</i> | 1 |
| <i>miR-451/144/4732 cluster</i> | <i>miR-429</i>                  | <i>let-7e/miR-99b cluster</i>   | 1 |
| <i>miR-451/144/4732 cluster</i> | <i>miR-429</i>                  | <i>miR-15b/16-2 cluster</i>     | 1 |
| <i>miR-451/144/4732 cluster</i> | <i>miR-451/144/4732 cluster</i> | <i>let-7c</i>                   | 1 |
| <i>miR-451/144/4732 cluster</i> | <i>miR-451/144/4732 cluster</i> | <i>miR-489</i>                  | 1 |
| <i>miR-451/144/4732 cluster</i> | <i>miR-489</i>                  | <i>miR-181c</i>                 | 1 |
| <i>miR-451/144/4732 cluster</i> | <i>miR-489</i>                  | <i>miR-488</i>                  | 1 |
| <i>miR-451/144/4732 cluster</i> | <i>miR-10b</i>                  | <i>miR-34a</i>                  | 1 |
| <i>miR-489</i>                  | <i>let-7c</i>                   | <i>miR-451/144/4732 cluster</i> | 1 |
| <i>miR-489</i>                  | <i>let-7d</i>                   | <i>miR-181a</i>                 | 1 |
| <i>miR-489</i>                  | <i>miR-16-1/15a cluster</i>     | <i>miR-708</i>                  | 1 |
| <i>miR-489</i>                  | <i>miR-29a</i>                  | <i>miR-708</i>                  | 1 |
| <i>miR-489</i>                  | <i>let-7e/miR-99b cluster</i>   | <i>miR-29a</i>                  | 1 |
| <i>miR-489</i>                  | <i>miR-181a</i>                 | <i>miR-196</i>                  | 1 |
| <i>miR-489</i>                  | <i>miR-181c</i>                 | <i>let-7a</i>                   | 1 |
| <i>miR-489</i>                  | <i>miR-181c</i>                 | <i>miR-328</i>                  | 1 |
| <i>miR-489</i>                  | <i>miR-376a</i>                 | <i>miR-29a</i>                  | 1 |
| <i>miR-489</i>                  | <i>miR-376a</i>                 | <i>miR-376a</i>                 | 1 |
| <i>miR-489</i>                  | <i>miR-376a</i>                 | <i>miR-489</i>                  | 1 |
| <i>miR-489</i>                  | <i>miR-488</i>                  | <i>miR-451/144/4732 cluster</i> | 1 |
| <i>miR-489</i>                  | <i>let-7i</i>                   | <i>miR-451/144/4732 cluster</i> | 1 |
| <i>miR-489</i>                  | <i>miR-328</i>                  | <i>miR-128b</i>                 | 1 |
| <i>miR-489</i>                  | <i>miR-10b</i>                  | <i>miR-10b</i>                  | 1 |
| <i>miR-10b</i>                  | <i>let-7a</i>                   | <i>miR-128b</i>                 | 1 |
| <i>miR-10b</i>                  | <i>let-7a</i>                   | <i>miR-31</i>                   | 1 |
| <i>miR-10b</i>                  | <i>let-7c</i>                   | <i>miR-328</i>                  | 1 |
| <i>miR-10b</i>                  | <i>let-7d</i>                   | <i>miR-31</i>                   | 1 |
| <i>miR-10b</i>                  | <i>miR-9-1</i>                  | <i>miR-324</i>                  | 1 |
| <i>miR-10b</i>                  | <i>miR-9-1</i>                  | <i>miR-10b</i>                  | 1 |
| <i>miR-10b</i>                  | <i>miR-29a</i>                  | <i>miR-324</i>                  | 1 |
| <i>miR-10b</i>                  | <i>miR-29a</i>                  | <i>miR-488</i>                  | 1 |
| <i>miR-10b</i>                  | <i>miR-34a</i>                  | <i>miR-16-1/15a cluster</i>     | 1 |
| <i>miR-10b</i>                  | <i>miR-99a</i>                  | <i>miR-451/144/4732 cluster</i> | 1 |
| <i>miR-10b</i>                  | <i>miR-128b</i>                 | <i>miR-488</i>                  | 1 |
| <i>miR-10b</i>                  | <i>miR-132</i>                  | <i>miR-10b</i>                  | 1 |
| <i>miR-10b</i>                  | <i>miR-181c</i>                 | <i>let-7d</i>                   | 1 |
| <i>miR-10b</i>                  | <i>miR-324</i>                  | <i>miR-29a</i>                  | 1 |
| <i>miR-10b</i>                  | <i>miR-324</i>                  | <i>miR-324</i>                  | 1 |
| <i>miR-10b</i>                  | <i>miR-324</i>                  | <i>miR-451/144/4732 cluster</i> | 1 |
| <i>miR-10b</i>                  | <i>miR-324</i>                  | <i>miR-10b</i>                  | 1 |

|                                |                                 |                                 |   |
|--------------------------------|---------------------------------|---------------------------------|---|
| <i>miR-10b</i>                 | <i>miR-376a</i>                 | <i>miR-16-1/15a</i> cluster     | 1 |
| <i>miR-10b</i>                 | <i>miR-376a</i>                 | <i>miR-34a</i>                  | 1 |
| <i>miR-10b</i>                 | <i>miR-376a</i>                 | <i>miR-196</i>                  | 1 |
| <i>miR-10b</i>                 | <i>miR-708</i>                  | <i>miR-181a</i>                 | 1 |
| <i>miR-10b</i>                 | <i>let-7i</i>                   | <i>let-7d</i>                   | 1 |
| <i>miR-10b</i>                 | <i>miR-15b/16-2</i> cluster     | <i>miR-29b</i>                  | 1 |
| <i>miR-10b</i>                 | <i>miR-196</i>                  | <i>miR-376a</i>                 | 1 |
| <i>miR-10b</i>                 | <i>miR-199b/3154</i> cluster    | <i>miR-181a</i>                 | 1 |
| <i>miR-10b</i>                 | <i>miR-216</i>                  | <i>miR-10b</i>                  | 1 |
| <i>miR-10b</i>                 | <i>miR-328</i>                  | <i>miR-188</i>                  | 1 |
| <i>miR-10b</i>                 | <i>miR-10b</i>                  | <i>miR-181a</i>                 | 1 |
| <i>let-7a</i>                  | <i>let-7d</i>                   | <i>miR-181a</i>                 | 2 |
| <i>let-7a</i>                  | <i>miR-29a</i>                  | <i>let-7a</i>                   | 2 |
| <i>let-7a</i>                  | <i>miR-29a</i>                  | <i>miR-708</i>                  | 2 |
| <i>let-7a</i>                  | <i>miR-29c</i>                  | <i>miR-181c</i>                 | 2 |
| <i>let-7a</i>                  | <i>miR-181c</i>                 | <i>miR-188</i>                  | 2 |
| <i>let-7a</i>                  | <i>miR-376a</i>                 | <i>miR-15b/16-2</i> cluster     | 2 |
| <i>let-7a</i>                  | <i>let-7i</i>                   | <i>let-7i</i>                   | 2 |
| <i>let-7b/miR-4763</i> cluster | <i>miR-181c</i>                 | <i>miR-216</i>                  | 2 |
| <i>let-7c</i>                  | <i>miR-29a</i>                  | <i>miR-29a</i>                  | 2 |
| <i>let-7c</i>                  | <i>miR-29b</i>                  | <i>miR-376a</i>                 | 2 |
| <i>let-7c</i>                  | <i>miR-99a</i>                  | <i>miR-10b</i>                  | 2 |
| <i>let-7c</i>                  | <i>miR-188</i>                  | <i>miR-451/144/4732</i> cluster | 2 |
| <i>let-7c</i>                  | <i>miR-376a</i>                 | <i>let-7d</i>                   | 2 |
| <i>let-7c</i>                  | <i>let-7i</i>                   | <i>let-7i</i>                   | 2 |
| <i>let-7c</i>                  | <i>miR-31</i>                   | <i>miR-373</i>                  | 2 |
| <i>let-7c</i>                  | <i>miR-199b/3154</i> cluster    | <i>miR-324</i>                  | 2 |
| <i>let-7c</i>                  | <i>miR-211</i>                  | <i>miR-128b</i>                 | 2 |
| <i>let-7d</i>                  | <i>miR-16-1/15a</i> cluster     | <i>miR-708</i>                  | 2 |
| <i>let-7d</i>                  | <i>miR-188</i>                  | <i>miR-181c</i>                 | 2 |
| <i>let-7d</i>                  | <i>miR-31</i>                   | <i>miR-181c</i>                 | 2 |
| <i>let-7d</i>                  | <i>miR-31</i>                   | <i>miR-196</i>                  | 2 |
| <i>miR-9-1</i>                 | <i>miR-29a</i>                  | <i>miR-429</i>                  | 2 |
| <i>miR-9-1</i>                 | <i>miR-24-2/27a/23a</i> cluster | <i>miR-216</i>                  | 2 |
| <i>miR-9-1</i>                 | <i>miR-489</i>                  | <i>miR-15b/16-2</i> cluster     | 2 |
| <i>miR-9-1</i>                 | <i>miR-10b</i>                  | <i>miR-16-1/15a</i> cluster     | 2 |
| <i>miR-16-1/15a</i> cluster    | <i>miR-93/106b</i> cluster      | <i>miR-31</i>                   | 2 |
| <i>miR-16-1/15a</i> cluster    | <i>miR-376a</i>                 | <i>miR-216</i>                  | 2 |
| <i>miR-16-1/15a</i> cluster    | <i>let-7i</i>                   | <i>miR-129-2</i>                | 2 |
| <i>miR-16-1/15a</i> cluster    | <i>miR-31</i>                   | <i>let-7i</i>                   | 2 |
| <i>miR-16-1/15a</i> cluster    | <i>miR-199b/3154</i> cluster    | <i>miR-34a</i>                  | 2 |
| <i>miR-16-1/15a</i> cluster    | <i>miR-429</i>                  | <i>miR-451/144/4732</i> cluster | 2 |
| <i>miR-16-1/15a</i> cluster    | <i>miR-451/144/4732</i> cluster | <i>miR-129-2</i>                | 2 |
| <i>miR-16-1/15a</i> cluster    | <i>miR-10b</i>                  | <i>miR-34a</i>                  | 2 |
| <i>miR-29a</i>                 | <i>miR-34a</i>                  | <i>miR-376a</i>                 | 2 |
| <i>miR-29a</i>                 | <i>let-7e/miR-99b</i> cluster   | <i>miR-16-1/15a</i> cluster     | 2 |
| <i>miR-29a</i>                 | <i>miR-181c</i>                 | <i>miR-212</i>                  | 2 |
| <i>miR-29a</i>                 | <i>miR-376a</i>                 | <i>miR-9-1</i>                  | 2 |
| <i>miR-29a</i>                 | <i>miR-376a</i>                 | <i>miR-24-2/27a/23a</i> cluster | 2 |
| <i>miR-29a</i>                 | <i>miR-376a</i>                 | <i>miR-211</i>                  | 2 |
| <i>miR-29a</i>                 | <i>let-7i</i>                   | <i>miR-29c</i>                  | 2 |
| <i>miR-29a</i>                 | <i>let-7i</i>                   | <i>miR-429</i>                  | 2 |
| <i>miR-29a</i>                 | <i>miR-373</i>                  | <i>miR-211</i>                  | 2 |

|                               |                                 |                                 |   |
|-------------------------------|---------------------------------|---------------------------------|---|
| <i>miR-29b</i>                | <i>let-7c</i>                   | <i>miR-128b</i>                 | 2 |
| <i>miR-29b</i>                | <i>let-7c</i>                   | <i>miR-31</i>                   | 2 |
| <i>miR-29b</i>                | <i>miR-29a</i>                  | <i>let-7d</i>                   | 2 |
| <i>miR-29b</i>                | <i>miR-212</i>                  | <i>miR-324</i>                  | 2 |
| <i>miR-29b</i>                | <i>miR-376a</i>                 | <i>miR-429</i>                  | 2 |
| <i>miR-29b</i>                | <i>miR-488</i>                  | <i>miR-128b</i>                 | 2 |
| <i>miR-29b</i>                | <i>miR-489</i>                  | <i>miR-29b</i>                  | 2 |
| <i>miR-29c</i>                | <i>let-7i</i>                   | <i>miR-451/144/4732 cluster</i> | 2 |
| <i>miR-29c</i>                | <i>miR-15b/16-2 cluster</i>     | <i>miR-376a</i>                 | 2 |
| <i>miR-34a</i>                | <i>let-7d</i>                   | <i>miR-31</i>                   | 2 |
| <i>miR-34a</i>                | <i>miR-29a</i>                  | <i>let-7e/miR-99b cluster</i>   | 2 |
| <i>miR-34a</i>                | <i>miR-34a</i>                  | <i>miR-31</i>                   | 2 |
| <i>miR-34a</i>                | <i>miR-211</i>                  | <i>let-7i</i>                   | 2 |
| <i>miR-99a</i>                | <i>miR-16-1/15a cluster</i>     | <i>miR-10b</i>                  | 2 |
| <i>miR-99a</i>                | <i>miR-29b</i>                  | <i>miR-376a</i>                 | 2 |
| <i>miR-99a</i>                | <i>let-7e/miR-99b cluster</i>   | <i>miR-181c</i>                 | 2 |
| <i>miR-99a</i>                | <i>miR-181c</i>                 | <i>miR-10b</i>                  | 2 |
| <i>miR-99a</i>                | <i>miR-451/144/4732 cluster</i> | <i>miR-31</i>                   | 2 |
| <i>let-7e/miR-99b cluster</i> | <i>miR-34a</i>                  | <i>miR-29b</i>                  | 2 |
| <i>let-7e/miR-99b cluster</i> | <i>miR-324</i>                  | <i>miR-9-1</i>                  | 2 |
| <i>let-7e/miR-99b cluster</i> | <i>miR-376a</i>                 | <i>miR-324</i>                  | 2 |
| <i>let-7e/miR-99b cluster</i> | <i>miR-373</i>                  | <i>miR-376a</i>                 | 2 |
| <i>miR-128b</i>               | <i>let-7d</i>                   | <i>miR-181a</i>                 | 2 |
| <i>miR-128b</i>               | <i>let-7d</i>                   | <i>miR-451/144/4732 cluster</i> | 2 |
| <i>miR-128b</i>               | <i>miR-16-1/15a cluster</i>     | <i>miR-211</i>                  | 2 |
| <i>miR-128b</i>               | <i>miR-29a</i>                  | <i>miR-15b/16-2 cluster</i>     | 2 |
| <i>miR-128b</i>               | <i>miR-128b</i>                 | <i>miR-99a</i>                  | 2 |
| <i>miR-128b</i>               | <i>miR-376a</i>                 | <i>miR-9-1</i>                  | 2 |
| <i>miR-128b</i>               | <i>miR-429</i>                  | <i>miR-196</i>                  | 2 |
| <i>miR-129-2</i>              | <i>miR-181a</i>                 | <i>let-7d</i>                   | 2 |
| <i>miR-129-2</i>              | <i>miR-181a</i>                 | <i>let-7e/miR-99b cluster</i>   | 2 |
| <i>miR-132</i>                | <i>miR-29a</i>                  | <i>miR-9-1</i>                  | 2 |
| <i>miR-132</i>                | <i>miR-181a</i>                 | <i>miR-451/144/4732 cluster</i> | 2 |
| <i>miR-181a</i>               | <i>let-7a</i>                   | <i>miR-31</i>                   | 2 |
| <i>miR-181a</i>               | <i>let-7a</i>                   | <i>miR-451/144/4732 cluster</i> | 2 |
| <i>miR-181a</i>               | <i>miR-16-1/15a cluster</i>     | <i>miR-29a</i>                  | 2 |
| <i>miR-181a</i>               | <i>miR-376a</i>                 | <i>miR-132</i>                  | 2 |
| <i>miR-181a</i>               | <i>miR-31</i>                   | <i>miR-188</i>                  | 2 |
| <i>miR-181a</i>               | <i>miR-199b/3154 cluster</i>    | <i>miR-29a</i>                  | 2 |
| <i>miR-181a</i>               | <i>miR-373</i>                  | <i>miR-29a</i>                  | 2 |
| <i>miR-181a</i>               | <i>miR-429</i>                  | <i>miR-376a</i>                 | 2 |
| <i>miR-181a</i>               | <i>miR-429</i>                  | <i>miR-451/144/4732 cluster</i> | 2 |
| <i>miR-181c</i>               | <i>let-7c</i>                   | <i>miR-29b</i>                  | 2 |
| <i>miR-181c</i>               | <i>let-7c</i>                   | <i>miR-212</i>                  | 2 |
| <i>miR-181c</i>               | <i>let-7d</i>                   | <i>miR-132</i>                  | 2 |
| <i>miR-181c</i>               | <i>miR-29b</i>                  | <i>miR-9-1</i>                  | 2 |
| <i>miR-181c</i>               | <i>miR-129-2</i>                | <i>miR-29a</i>                  | 2 |
| <i>miR-181c</i>               | <i>miR-212</i>                  | <i>miR-93/106b cluster</i>      | 2 |
| <i>miR-181c</i>               | <i>miR-24-2/27a/23a cluster</i> | <i>miR-212</i>                  | 2 |
| <i>miR-181c</i>               | <i>miR-126</i>                  | <i>miR-15b/16-2 cluster</i>     | 2 |
| <i>miR-181c</i>               | <i>miR-196</i>                  | <i>miR-34a</i>                  | 2 |
| <i>miR-181c</i>               | <i>miR-328</i>                  | <i>miR-216</i>                  | 2 |
| <i>miR-188</i>                | <i>let-7c</i>                   | <i>miR-24-2/27a/23a cluster</i> | 2 |

|                                 |                                 |                                 |   |
|---------------------------------|---------------------------------|---------------------------------|---|
| <i>miR-188</i>                  | <i>miR-16-1/15a</i> cluster     | <i>miR-376a</i>                 | 2 |
| <i>miR-188</i>                  | <i>miR-29a</i>                  | <i>miR-196</i>                  | 2 |
| <i>miR-188</i>                  | <i>miR-181c</i>                 | <i>let-7d</i>                   | 2 |
| <i>miR-188</i>                  | <i>miR-31</i>                   | <i>miR-451/144/4732</i> cluster | 2 |
| <i>miR-212</i>                  | <i>let-7a</i>                   | <i>miR-31</i>                   | 2 |
| <i>miR-324</i>                  | <i>miR-29b</i>                  | <i>miR-429</i>                  | 2 |
| <i>miR-324</i>                  | <i>let-7e/miR-99b</i> cluster   | <i>miR-181a</i>                 | 2 |
| <i>miR-324</i>                  | <i>miR-128b</i>                 | <i>miR-126</i>                  | 2 |
| <i>miR-324</i>                  | <i>miR-181a</i>                 | <i>miR-216</i>                  | 2 |
| <i>miR-324</i>                  | <i>miR-15b/16-2</i> cluster     | <i>miR-16-1/15a</i> cluster     | 2 |
| <i>miR-376a</i>                 | <i>miR-29a</i>                  | <i>miR-216</i>                  | 2 |
| <i>miR-376a</i>                 | <i>miR-128b</i>                 | <i>miR-181c</i>                 | 2 |
| <i>miR-376a</i>                 | <i>miR-212</i>                  | <i>miR-376a</i>                 | 2 |
| <i>miR-376a</i>                 | <i>miR-376a</i>                 | <i>miR-212</i>                  | 2 |
| <i>miR-376a</i>                 | <i>miR-451/144/4732</i> cluster | <i>let-7b/miR-4763</i> cluster  | 2 |
| <i>miR-488</i>                  | <i>miR-16-1/15a</i> cluster     | <i>miR-376a</i>                 | 2 |
| <i>miR-488</i>                  | <i>miR-181c</i>                 | <i>miR-216</i>                  | 2 |
| <i>miR-488</i>                  | <i>miR-376a</i>                 | <i>miR-128b</i>                 | 2 |
| <i>miR-488</i>                  | <i>miR-31</i>                   | <i>miR-31</i>                   | 2 |
| <i>miR-708</i>                  | <i>miR-16-1/15a</i> cluster     | <i>miR-328</i>                  | 2 |
| <i>miR-708</i>                  | <i>miR-29a</i>                  | <i>miR-373</i>                  | 2 |
| <i>miR-708</i>                  | <i>miR-34a</i>                  | <i>miR-181a</i>                 | 2 |
| <i>miR-708</i>                  | <i>miR-376a</i>                 | <i>miR-188</i>                  | 2 |
| <i>miR-708</i>                  | <i>miR-376a</i>                 | <i>miR-211</i>                  | 2 |
| <i>let-7i</i>                   | <i>miR-9-1</i>                  | <i>miR-376a</i>                 | 2 |
| <i>let-7i</i>                   | <i>miR-29b</i>                  | <i>miR-31</i>                   | 2 |
| <i>let-7i</i>                   | <i>miR-376a</i>                 | <i>miR-93/106b</i> cluster      | 2 |
| <i>let-7i</i>                   | <i>miR-31</i>                   | <i>let-7b/miR-4763</i> cluster  | 2 |
| <i>let-7i</i>                   | <i>miR-196</i>                  | <i>miR-29b</i>                  | 2 |
| <i>miR-15b/16-2</i> cluster     | <i>let-7a</i>                   | <i>let-7e/miR-99b</i> cluster   | 2 |
| <i>miR-15b/16-2</i> cluster     | <i>let-7c</i>                   | <i>miR-376a</i>                 | 2 |
| <i>miR-15b/16-2</i> cluster     | <i>let-7c</i>                   | <i>miR-216</i>                  | 2 |
| <i>miR-15b/16-2</i> cluster     | <i>miR-16-1/15a</i> cluster     | <i>miR-24-2/27a/23a</i> cluster | 2 |
| <i>miR-15b/16-2</i> cluster     | <i>miR-34a</i>                  | <i>miR-15b/16-2</i> cluster     | 2 |
| <i>miR-15b/16-2</i> cluster     | <i>let-7e/miR-99b</i> cluster   | <i>miR-324</i>                  | 2 |
| <i>miR-15b/16-2</i> cluster     | <i>miR-181c</i>                 | <i>miR-16-1/15a</i> cluster     | 2 |
| <i>miR-15b/16-2</i> cluster     | <i>miR-31</i>                   | <i>miR-9-1</i>                  | 2 |
| <i>miR-15b/16-2</i> cluster     | <i>miR-126</i>                  | <i>miR-181a</i>                 | 2 |
| <i>miR-15b/16-2</i> cluster     | <i>miR-10b</i>                  | <i>miR-129-2</i>                | 2 |
| <i>miR-24-2/27a/23a</i> cluster | <i>miR-181c</i>                 | <i>miR-129-2</i>                | 2 |
| <i>miR-24-2/27a/23a</i> cluster | <i>miR-488</i>                  | <i>miR-181a</i>                 | 2 |
| <i>miR-24-2/27a/23a</i> cluster | <i>miR-451/144/4732</i> cluster | <i>miR-34a</i>                  | 2 |
| <i>miR-24-2/27a/23a</i> cluster | <i>miR-451/144/4732</i> cluster | <i>miR-199b/3154</i> cluster    | 2 |
| <i>miR-24-2/27a/23a</i> cluster | <i>miR-10b</i>                  | <i>miR-373</i>                  | 2 |
| <i>miR-31</i>                   | <i>let-7a</i>                   | <i>miR-31</i>                   | 2 |
| <i>miR-31</i>                   | <i>miR-16-1/15a</i> cluster     | <i>miR-488</i>                  | 2 |
| <i>miR-31</i>                   | <i>let-7e/miR-99b</i> cluster   | <i>miR-24-2/27a/23a</i> cluster | 2 |
| <i>miR-31</i>                   | <i>miR-181c</i>                 | <i>miR-196</i>                  | 2 |
| <i>miR-31</i>                   | <i>miR-376a</i>                 | <i>miR-373</i>                  | 2 |
| <i>miR-31</i>                   | <i>let-7i</i>                   | <i>miR-93/106b</i> cluster      | 2 |
| <i>miR-31</i>                   | <i>miR-211</i>                  | <i>miR-376a</i>                 | 2 |
| <i>miR-31</i>                   | <i>miR-373</i>                  | <i>miR-24-2/27a/23a</i> cluster | 2 |
| <i>miR-31</i>                   | <i>miR-429</i>                  | <i>let-7e/miR-99b</i> cluster   | 2 |

|                                 |                                 |                                 |   |
|---------------------------------|---------------------------------|---------------------------------|---|
| <i>miR-31</i>                   | <i>miR-489</i>                  | <i>miR-29b</i>                  | 2 |
| <i>miR-126</i>                  | <i>miR-488</i>                  | <i>miR-29a</i>                  | 2 |
| <i>miR-126</i>                  | <i>miR-708</i>                  | <i>miR-451/144/4732 cluster</i> | 2 |
| <i>miR-126</i>                  | <i>miR-489</i>                  | <i>miR-181a</i>                 | 2 |
| <i>miR-126</i>                  | <i>miR-10b</i>                  | <i>miR-10b</i>                  | 2 |
| <i>miR-196</i>                  | <i>miR-16-1/15a cluster</i>     | <i>let-7i</i>                   | 2 |
| <i>miR-196</i>                  | <i>miR-29a</i>                  | <i>let-7d</i>                   | 2 |
| <i>miR-196</i>                  | <i>miR-29a</i>                  | <i>miR-181c</i>                 | 2 |
| <i>miR-196</i>                  | <i>miR-29c</i>                  | <i>miR-451/144/4732 cluster</i> | 2 |
| <i>miR-196</i>                  | <i>miR-34a</i>                  | <i>miR-29b</i>                  | 2 |
| <i>miR-196</i>                  | <i>miR-31</i>                   | <i>let-7i</i>                   | 2 |
| <i>miR-196</i>                  | <i>miR-199b/3154 cluster</i>    | <i>miR-376a</i>                 | 2 |
| <i>miR-196</i>                  | <i>miR-489</i>                  | <i>miR-376a</i>                 | 2 |
| <i>miR-196</i>                  | <i>miR-10b</i>                  | <i>miR-16-1/15a cluster</i>     | 2 |
| <i>miR-199b/3154 cluster</i>    | <i>let-7c</i>                   | <i>miR-15b/16-2 cluster</i>     | 2 |
| <i>miR-199b/3154 cluster</i>    | <i>miR-16-1/15a cluster</i>     | <i>miR-181c</i>                 | 2 |
| <i>miR-199b/3154 cluster</i>    | <i>miR-212</i>                  | <i>miR-128b</i>                 | 2 |
| <i>miR-211</i>                  | <i>miR-128b</i>                 | <i>miR-31</i>                   | 2 |
| <i>miR-211</i>                  | <i>miR-324</i>                  | <i>let-7a</i>                   | 2 |
| <i>miR-211</i>                  | <i>miR-324</i>                  | <i>miR-93/106b cluster</i>      | 2 |
| <i>miR-216</i>                  | <i>let-7e/miR-99b cluster</i>   | <i>miR-181a</i>                 | 2 |
| <i>miR-216</i>                  | <i>miR-128b</i>                 | <i>miR-429</i>                  | 2 |
| <i>miR-216</i>                  | <i>miR-451/144/4732 cluster</i> | <i>miR-15b/16-2 cluster</i>     | 2 |
| <i>miR-216</i>                  | <i>miR-10b</i>                  | <i>miR-10b</i>                  | 2 |
| <i>miR-328</i>                  | <i>miR-29a</i>                  | <i>miR-489</i>                  | 2 |
| <i>miR-328</i>                  | <i>miR-34a</i>                  | <i>miR-128b</i>                 | 2 |
| <i>miR-328</i>                  | <i>miR-128b</i>                 | <i>miR-196</i>                  | 2 |
| <i>miR-328</i>                  | <i>let-7i</i>                   | <i>miR-15b/16-2 cluster</i>     | 2 |
| <i>miR-328</i>                  | <i>miR-451/144/4732 cluster</i> | <i>miR-181a</i>                 | 2 |
| <i>miR-373</i>                  | <i>let-7c</i>                   | <i>miR-451/144/4732 cluster</i> | 2 |
| <i>miR-373</i>                  | <i>miR-216</i>                  | <i>miR-31</i>                   | 2 |
| <i>miR-373</i>                  | <i>miR-373</i>                  | <i>miR-29a</i>                  | 2 |
| <i>miR-429</i>                  | <i>miR-181c</i>                 | <i>miR-212</i>                  | 2 |
| <i>miR-429</i>                  | <i>miR-188</i>                  | <i>miR-181c</i>                 | 2 |
| <i>miR-429</i>                  | <i>miR-324</i>                  | <i>miR-181c</i>                 | 2 |
| <i>miR-429</i>                  | <i>miR-376a</i>                 | <i>miR-216</i>                  | 2 |
| <i>miR-429</i>                  | <i>miR-15b/16-2 cluster</i>     | <i>miR-373</i>                  | 2 |
| <i>miR-429</i>                  | <i>miR-31</i>                   | <i>miR-9-1</i>                  | 2 |
| <i>miR-451/144/4732 cluster</i> | <i>let-7c</i>                   | <i>miR-93/106b cluster</i>      | 2 |
| <i>miR-451/144/4732 cluster</i> | <i>miR-9-1</i>                  | <i>miR-15b/16-2 cluster</i>     | 2 |
| <i>miR-451/144/4732 cluster</i> | <i>miR-16-1/15a cluster</i>     | <i>miR-489</i>                  | 2 |
| <i>miR-451/144/4732 cluster</i> | <i>miR-29a</i>                  | <i>miR-429</i>                  | 2 |
| <i>miR-451/144/4732 cluster</i> | <i>miR-29b</i>                  | <i>miR-199b/3154 cluster</i>    | 2 |
| <i>miR-451/144/4732 cluster</i> | <i>miR-29b</i>                  | <i>miR-10b</i>                  | 2 |
| <i>miR-451/144/4732 cluster</i> | <i>miR-99a</i>                  | <i>let-7d</i>                   | 2 |
| <i>miR-451/144/4732 cluster</i> | <i>miR-188</i>                  | <i>miR-451/144/4732 cluster</i> | 2 |
| <i>miR-451/144/4732 cluster</i> | <i>miR-31</i>                   | <i>miR-212</i>                  | 2 |
| <i>miR-451/144/4732 cluster</i> | <i>miR-126</i>                  | <i>miR-181a</i>                 | 2 |
| <i>miR-451/144/4732 cluster</i> | <i>miR-216</i>                  | <i>miR-488</i>                  | 2 |
| <i>miR-451/144/4732 cluster</i> | <i>miR-10b</i>                  | <i>miR-708</i>                  | 2 |
| <i>miR-489</i>                  | <i>miR-128b</i>                 | <i>miR-31</i>                   | 2 |
| <i>miR-489</i>                  | <i>miR-181c</i>                 | <i>miR-29c</i>                  | 2 |
| <i>miR-489</i>                  | <i>miR-181c</i>                 | <i>miR-199b/3154 cluster</i>    | 2 |

|                                |                                 |                                 |   |
|--------------------------------|---------------------------------|---------------------------------|---|
| <i>miR-489</i>                 | <i>miR-31</i>                   | <i>miR-324</i>                  | 2 |
| <i>miR-10b</i>                 | <i>let-7a</i>                   | <i>miR-181a</i>                 | 2 |
| <i>miR-10b</i>                 | <i>let-7a</i>                   | <i>miR-216</i>                  | 2 |
| <i>miR-10b</i>                 | <i>miR-29a</i>                  | <i>miR-708</i>                  | 2 |
| <i>miR-10b</i>                 | <i>miR-29c</i>                  | <i>miR-128b</i>                 | 2 |
| <i>miR-10b</i>                 | <i>miR-376a</i>                 | <i>miR-188</i>                  | 2 |
| <i>miR-10b</i>                 | <i>miR-708</i>                  | <i>let-7c</i>                   | 2 |
| <i>miR-10b</i>                 | <i>miR-199b/3154 cluster</i>    | <i>miR-99a</i>                  | 2 |
| <i>miR-10b</i>                 | <i>miR-216</i>                  | <i>let-7i</i>                   | 2 |
| <i>miR-10b</i>                 | <i>miR-328</i>                  | <i>let-7d</i>                   | 2 |
| <i>let-7a</i>                  | <i>let-7e/miR-99b cluster</i>   | <i>miR-15b/16-2 cluster</i>     | 3 |
| <i>let-7a</i>                  | <i>miR-324</i>                  | <i>miR-181c</i>                 | 3 |
| <i>let-7a</i>                  | <i>miR-376a</i>                 | <i>miR-429</i>                  | 3 |
| <i>let-7b/miR-4763 cluster</i> | <i>miR-373</i>                  | <i>miR-376a</i>                 | 3 |
| <i>let-7c</i>                  | <i>miR-376a</i>                 | <i>let-7i</i>                   | 3 |
| <i>let-7c</i>                  | <i>miR-24-2/27a/23a cluster</i> | <i>miR-488</i>                  | 3 |
| <i>let-7c</i>                  | <i>miR-24-2/27a/23a cluster</i> | <i>miR-15b/16-2 cluster</i>     | 3 |
| <i>miR-9-1</i>                 | <i>let-7c</i>                   | <i>miR-34a</i>                  | 3 |
| <i>miR-9-1</i>                 | <i>miR-128b</i>                 | <i>miR-31</i>                   | 3 |
| <i>miR-9-1</i>                 | <i>miR-181c</i>                 | <i>miR-34a</i>                  | 3 |
| <i>miR-9-1</i>                 | <i>miR-199b/3154 cluster</i>    | <i>let-7i</i>                   | 3 |
| <i>miR-16-1/15a cluster</i>    | <i>let-7c</i>                   | <i>miR-708</i>                  | 3 |
| <i>miR-16-1/15a cluster</i>    | <i>miR-126</i>                  | <i>miR-181c</i>                 | 3 |
| <i>miR-29b</i>                 | <i>let-7d</i>                   | <i>miR-181c</i>                 | 3 |
| <i>miR-29b</i>                 | <i>let-7i</i>                   | <i>miR-15b/16-2 cluster</i>     | 3 |
| <i>miR-29b</i>                 | <i>miR-451/144/4732 cluster</i> | <i>miR-181c</i>                 | 3 |
| <i>miR-29b</i>                 | <i>miR-489</i>                  | <i>miR-211</i>                  | 3 |
| <i>miR-34a</i>                 | <i>miR-451/144/4732 cluster</i> | <i>miR-128b</i>                 | 3 |
| <i>miR-34a</i>                 | <i>miR-489</i>                  | <i>miR-29b</i>                  | 3 |
| <i>miR-99a</i>                 | <i>miR-29a</i>                  | <i>miR-451/144/4732 cluster</i> | 3 |
| <i>miR-99a</i>                 | <i>miR-128b</i>                 | <i>miR-24-2/27a/23a cluster</i> | 3 |
| <i>miR-99a</i>                 | <i>let-7i</i>                   | <i>miR-324</i>                  | 3 |
| <i>miR-99a</i>                 | <i>miR-451/144/4732 cluster</i> | <i>miR-429</i>                  | 3 |
| <i>let-7e/miR-99b cluster</i>  | <i>miR-324</i>                  | <i>let-7i</i>                   | 3 |
| <i>let-7e/miR-99b cluster</i>  | <i>miR-488</i>                  | <i>miR-376a</i>                 | 3 |
| <i>miR-128b</i>                | <i>miR-181a</i>                 | <i>miR-199b/3154 cluster</i>    | 3 |
| <i>miR-128b</i>                | <i>miR-708</i>                  | <i>miR-196</i>                  | 3 |
| <i>miR-128b</i>                | <i>miR-24-2/27a/23a cluster</i> | <i>miR-376a</i>                 | 3 |
| <i>miR-129-2</i>               | <i>miR-376a</i>                 | <i>miR-373</i>                  | 3 |
| <i>miR-129-2</i>               | <i>miR-451/144/4732 cluster</i> | <i>miR-328</i>                  | 3 |
| <i>miR-181a</i>                | <i>miR-29a</i>                  | <i>miR-9-1</i>                  | 3 |
| <i>miR-181a</i>                | <i>miR-376a</i>                 | <i>miR-34a</i>                  | 3 |
| <i>miR-181c</i>                | <i>miR-99a</i>                  | <i>miR-99a</i>                  | 3 |
| <i>miR-181c</i>                | <i>miR-93/106b cluster</i>      | <i>miR-29c</i>                  | 3 |
| <i>miR-181c</i>                | <i>miR-31</i>                   | <i>miR-196</i>                  | 3 |
| <i>miR-181c</i>                | <i>miR-429</i>                  | <i>miR-451/144/4732 cluster</i> | 3 |
| <i>miR-188</i>                 | <i>let-7a</i>                   | <i>miR-16-1/15a cluster</i>     | 3 |
| <i>miR-188</i>                 | <i>miR-324</i>                  | <i>miR-181a</i>                 | 3 |
| <i>miR-212</i>                 | <i>miR-324</i>                  | <i>miR-376a</i>                 | 3 |
| <i>miR-324</i>                 | <i>miR-132</i>                  | <i>miR-181c</i>                 | 3 |
| <i>miR-324</i>                 | <i>miR-212</i>                  | <i>miR-324</i>                  | 3 |
| <i>miR-376a</i>                | <i>let-7c</i>                   | <i>miR-212</i>                  | 3 |
| <i>miR-376a</i>                | <i>miR-29a</i>                  | <i>miR-376a</i>                 | 3 |



|                                 |                                 |                                 |   |
|---------------------------------|---------------------------------|---------------------------------|---|
| <i>miR-376a</i>                 | <i>let-7e/miR-99b</i> cluster   | <i>miR-211</i>                  | 3 |
| <i>miR-376a</i>                 | <i>miR-181c</i>                 | <i>let-7i</i>                   | 3 |
| <i>miR-488</i>                  | <i>miR-376a</i>                 | <i>miR-99a</i>                  | 3 |
| <i>miR-708</i>                  | <i>miR-181a</i>                 | <i>miR-199b/3154</i> cluster    | 3 |
| <i>let-7i</i>                   | <i>miR-488</i>                  | <i>miR-29a</i>                  | 3 |
| <i>let-7i</i>                   | <i>miR-31</i>                   | <i>miR-196</i>                  | 3 |
| <i>miR-15b/16-2</i> cluster     | <i>let-7d</i>                   | <i>let-7c</i>                   | 3 |
| <i>miR-15b/16-2</i> cluster     | <i>miR-129-2</i>                | <i>miR-16-1/15a</i> cluster     | 3 |
| <i>miR-15b/16-2</i> cluster     | <i>miR-181c</i>                 | <i>miR-376a</i>                 | 3 |
| <i>miR-15b/16-2</i> cluster     | <i>miR-188</i>                  | <i>miR-10b</i>                  | 3 |
| <i>miR-15b/16-2</i> cluster     | <i>miR-451/144/4732</i> cluster | <i>miR-376a</i>                 | 3 |
| <i>miR-31</i>                   | <i>miR-34a</i>                  | <i>miR-199b/3154</i> cluster    | 3 |
| <i>miR-31</i>                   | <i>miR-181c</i>                 | <i>miR-132</i>                  | 3 |
| <i>miR-126</i>                  | <i>let-7c</i>                   | <i>miR-324</i>                  | 3 |
| <i>miR-126</i>                  | <i>miR-181c</i>                 | <i>let-7a</i>                   | 3 |
| <i>miR-196</i>                  | <i>let-7e/miR-99b</i> cluster   | <i>miR-211</i>                  | 3 |
| <i>miR-199b/3154</i> cluster    | <i>miR-181c</i>                 | <i>miR-212</i>                  | 3 |
| <i>miR-199b/3154</i> cluster    | <i>miR-489</i>                  | <i>let-7i</i>                   | 3 |
| <i>miR-199b/3154</i> cluster    | <i>miR-10b</i>                  | <i>miR-31</i>                   | 3 |
| <i>miR-211</i>                  | <i>miR-451/144/4732</i> cluster | <i>miR-328</i>                  | 3 |
| <i>miR-216</i>                  | <i>let-7c</i>                   | <i>miR-128b</i>                 | 3 |
| <i>miR-216</i>                  | <i>miR-31</i>                   | <i>miR-10b</i>                  | 3 |
| <i>miR-328</i>                  | <i>let-7a</i>                   | <i>miR-181c</i>                 | 3 |
| <i>miR-373</i>                  | <i>let-7e/miR-99b</i> cluster   | <i>miR-216</i>                  | 3 |
| <i>miR-373</i>                  | <i>miR-128b</i>                 | <i>miR-16-1/15a</i> cluster     | 3 |
| <i>miR-373</i>                  | <i>miR-488</i>                  | <i>miR-16-1/15a</i> cluster     | 3 |
| <i>miR-373</i>                  | <i>miR-31</i>                   | <i>miR-376a</i>                 | 3 |
| <i>miR-429</i>                  | <i>miR-16-1/15a</i> cluster     | <i>miR-451/144/4732</i> cluster | 3 |
| <i>miR-429</i>                  | <i>miR-489</i>                  | <i>miR-376a</i>                 | 3 |
| <i>miR-429</i>                  | <i>miR-10b</i>                  | <i>miR-211</i>                  | 3 |
| <i>miR-451/144/4732</i> cluster | <i>miR-9-1</i>                  | <i>let-7e/miR-99b</i> cluster   | 3 |
| <i>miR-451/144/4732</i> cluster | <i>miR-16-1/15a</i> cluster     | <i>miR-128b</i>                 | 3 |
| <i>miR-451/144/4732</i> cluster | <i>miR-132</i>                  | <i>miR-128b</i>                 | 3 |
| <i>miR-451/144/4732</i> cluster | <i>miR-216</i>                  | <i>miR-181a</i>                 | 3 |
| <i>miR-489</i>                  | <i>miR-128b</i>                 | <i>miR-376a</i>                 | 3 |
| <i>miR-10b</i>                  | <i>miR-128b</i>                 | <i>miR-324</i>                  | 3 |
| <i>miR-10b</i>                  | <i>miR-212</i>                  | <i>miR-181c</i>                 | 3 |
| <i>miR-10b</i>                  | <i>miR-15b/16-2</i> cluster     | <i>miR-451/144/4732</i> cluster | 3 |
| <i>miR-10b</i>                  | <i>miR-31</i>                   | <i>miR-451/144/4732</i> cluster | 3 |
| <i>miR-10b</i>                  | <i>miR-10b</i>                  | <i>miR-99a</i>                  | 3 |
| <i>miR-10b</i>                  | <i>miR-10b</i>                  | <i>miR-93/106b</i> cluster      | 3 |
| <i>let-7c</i>                   | <i>miR-16-1/15a</i> cluster     | <i>miR-132</i>                  | 4 |
| <i>let-7d</i>                   | <i>miR-29b</i>                  | <i>miR-10b</i>                  | 4 |
| <i>miR-29a</i>                  | <i>miR-10b</i>                  | <i>miR-126</i>                  | 4 |
| <i>miR-128b</i>                 | <i>miR-29a</i>                  | <i>miR-488</i>                  | 4 |
| <i>miR-128b</i>                 | <i>miR-34a</i>                  | <i>miR-328</i>                  | 4 |
| <i>miR-128b</i>                 | <i>miR-126</i>                  | <i>miR-16-1/15a</i> cluster     | 4 |
| <i>miR-128b</i>                 | <i>miR-216</i>                  | <i>miR-126</i>                  | 4 |
| <i>miR-128b</i>                 | <i>miR-373</i>                  | <i>miR-373</i>                  | 4 |
| <i>miR-128b</i>                 | <i>miR-429</i>                  | <i>miR-15b/16-2</i> cluster     | 4 |
| <i>miR-132</i>                  | <i>miR-181a</i>                 | <i>miR-126</i>                  | 4 |
| <i>miR-324</i>                  | <i>miR-324</i>                  | <i>miR-196</i>                  | 4 |
| <i>miR-376a</i>                 | <i>miR-128b</i>                 | <i>miR-488</i>                  | 4 |



|                                 |                                 |                                 |   |
|---------------------------------|---------------------------------|---------------------------------|---|
| <i>miR-708</i>                  | <i>miR-128b</i>                 | <i>let-7i</i>                   | 4 |
| <i>miR-15b/16-2</i> cluster     | <i>miR-16-1/15a</i> cluster     | <i>let-7i</i>                   | 4 |
| <i>miR-15b/16-2</i> cluster     | <i>miR-10b</i>                  | <i>miR-99a</i>                  | 4 |
| <i>miR-328</i>                  | <i>miR-132</i>                  | <i>miR-181c</i>                 | 4 |
| <i>miR-373</i>                  | <i>miR-15b/16-2</i> cluster     | <i>miR-211</i>                  | 4 |
| <i>miR-429</i>                  | <i>miR-324</i>                  | <i>miR-29a</i>                  | 4 |
| <i>miR-429</i>                  | <i>miR-488</i>                  | <i>miR-128b</i>                 | 4 |
| <i>miR-10b</i>                  | <i>miR-15b/16-2</i> cluster     | <i>miR-196</i>                  | 4 |
| <i>let-7a</i>                   | <i>miR-376a</i>                 | <i>miR-181a</i>                 | 5 |
| <i>let-7a</i>                   | <i>miR-376a</i>                 | <i>miR-328</i>                  | 5 |
| <i>miR-9-1</i>                  | <i>let-7a</i>                   | <i>miR-376a</i>                 | 5 |
| <i>miR-16-1/15a</i> cluster     | <i>miR-34a</i>                  | <i>miR-24-2/27a/23a</i> cluster | 5 |
| <i>miR-16-1/15a</i> cluster     | <i>miR-128b</i>                 | <i>miR-29c</i>                  | 5 |
| <i>miR-29a</i>                  | <i>miR-10b</i>                  | <i>miR-373</i>                  | 5 |
| <i>miR-34a</i>                  | <i>miR-451/144/4732</i> cluster | <i>miR-181a</i>                 | 5 |
| <i>miR-99a</i>                  | <i>miR-212</i>                  | <i>miR-181a</i>                 | 5 |
| <i>miR-99a</i>                  | <i>miR-199b/3154</i> cluster    | <i>miR-181c</i>                 | 5 |
| <i>miR-128b</i>                 | <i>miR-29c</i>                  | <i>miR-451/144/4732</i> cluster | 5 |
| <i>miR-129-2</i>                | <i>miR-16-1/15a</i> cluster     | <i>miR-451/144/4732</i> cluster | 5 |
| <i>miR-324</i>                  | <i>miR-10b</i>                  | <i>miR-31</i>                   | 5 |
| <i>miR-24-2/27a/23a</i> cluster | <i>miR-34a</i>                  | <i>miR-16-1/15a</i> cluster     | 5 |
| <i>miR-199b/3154</i> cluster    | <i>miR-132</i>                  | <i>miR-181c</i>                 | 5 |
| <i>miR-199b/3154</i> cluster    | <i>miR-15b/16-2</i> cluster     | <i>miR-31</i>                   | 5 |
| <i>miR-373</i>                  | <i>miR-31</i>                   | <i>miR-451/144/4732</i> cluster | 5 |
| <i>miR-373</i>                  | <i>miR-196</i>                  | <i>miR-181c</i>                 | 5 |
| <i>miR-429</i>                  | <i>miR-216</i>                  | <i>miR-199b/3154</i> cluster    | 5 |
| <i>miR-451/144/4732</i> cluster | <i>let-7e/miR-99b</i> cluster   | <i>miR-708</i>                  | 5 |
| <i>let-7a</i>                   | <i>miR-199b/3154</i> cluster    | <i>miR-181c</i>                 | 6 |
| <i>miR-29a</i>                  | <i>miR-216</i>                  | <i>let-7e/miR-99b</i> cluster   | 6 |
| <i>let-7e/miR-99b</i> cluster   | <i>miR-29a</i>                  | <i>miR-211</i>                  | 6 |
| <i>miR-132</i>                  | <i>miR-15b/16-2</i> cluster     | <i>let-7d</i>                   | 6 |
| <i>miR-181c</i>                 | <i>miR-29a</i>                  | <i>miR-216</i>                  | 6 |
| <i>let-7i</i>                   | <i>miR-708</i>                  | <i>miR-181c</i>                 | 6 |
| <i>miR-451/144/4732</i> cluster | <i>miR-29c</i>                  | <i>miR-708</i>                  | 6 |
| <i>let-7a</i>                   | <i>miR-181c</i>                 | <i>miR-128b</i>                 | 7 |
| <i>let-7d</i>                   | <i>miR-181c</i>                 | <i>let-7d</i>                   | 7 |
| <i>miR-29a</i>                  | <i>miR-24-2/27a/23a</i> cluster | <i>miR-429</i>                  | 7 |
| <i>miR-93/106b</i> cluster      | <i>miR-31</i>                   | <i>miR-24-2/27a/23a</i> cluster | 7 |
| <i>miR-128b</i>                 | <i>miR-126</i>                  | <i>miR-376a</i>                 | 7 |
| <i>miR-132</i>                  | <i>miR-196</i>                  | <i>miR-376a</i>                 | 7 |
| <i>miR-181c</i>                 | <i>miR-708</i>                  | <i>miR-129-2</i>                | 7 |
| <i>miR-324</i>                  | <i>miR-29b</i>                  | <i>let-7e/miR-99b</i> cluster   | 7 |
| <i>miR-376a</i>                 | <i>miR-128b</i>                 | <i>let-7c</i>                   | 7 |
| <i>miR-376a</i>                 | <i>miR-324</i>                  | <i>let-7e/miR-99b</i> cluster   | 7 |
| <i>miR-15b/16-2</i> cluster     | <i>miR-188</i>                  | <i>miR-181a</i>                 | 7 |
| <i>miR-24-2/27a/23a</i> cluster | <i>let-7i</i>                   | <i>miR-9-1</i>                  | 7 |
| <i>miR-24-2/27a/23a</i> cluster | <i>miR-31</i>                   | <i>miR-181a</i>                 | 7 |
| <i>miR-24-2/27a/23a</i> cluster | <i>miR-199b/3154</i> cluster    | <i>miR-328</i>                  | 7 |
| <i>miR-451/144/4732</i> cluster | <i>miR-15b/16-2</i> cluster     | <i>miR-31</i>                   | 7 |
| <i>miR-451/144/4732</i> cluster | <i>miR-451/144/4732</i> cluster | <i>miR-29a</i>                  | 7 |
| <i>miR-10b</i>                  | <i>miR-132</i>                  | <i>let-7e/miR-99b</i> cluster   | 7 |
| <i>miR-29a</i>                  | <i>miR-212</i>                  | <i>miR-708</i>                  | 8 |
| <i>miR-29a</i>                  | <i>miR-24-2/27a/23a</i> cluster | <i>miR-29a</i>                  | 8 |

|                                 |                                 |                                 |    |
|---------------------------------|---------------------------------|---------------------------------|----|
| <i>miR-212</i>                  | <i>miR-324</i>                  | <i>let-7i</i>                   | 8  |
| <i>miR-212</i>                  | <i>miR-373</i>                  | <i>miR-31</i>                   | 8  |
| <i>miR-376a</i>                 | <i>miR-93/106b</i> cluster      | <i>miR-376a</i>                 | 8  |
| <i>miR-199b/3154</i> cluster    | <i>let-7a</i>                   | <i>miR-10b</i>                  | 8  |
| <i>miR-373</i>                  | <i>miR-708</i>                  | <i>miR-10b</i>                  | 8  |
| <i>miR-429</i>                  | <i>miR-429</i>                  | <i>miR-376a</i>                 | 8  |
| <i>miR-29a</i>                  | <i>miR-199b/3154</i> cluster    | <i>miR-128b</i>                 | 9  |
| <i>miR-29c</i>                  | <i>miR-324</i>                  | <i>miR-31</i>                   | 9  |
| <i>miR-34a</i>                  | <i>miR-429</i>                  | <i>miR-16-1/15a</i> cluster     | 9  |
| <i>miR-188</i>                  | <i>miR-16-1/15a</i> cluster     | <i>miR-29a</i>                  | 9  |
| <i>miR-376a</i>                 | <i>miR-29a</i>                  | <i>miR-324</i>                  | 9  |
| <i>let-7i</i>                   | <i>miR-373</i>                  | <i>miR-128b</i>                 | 9  |
| <i>miR-10b</i>                  | <i>miR-373</i>                  | <i>miR-181a</i>                 | 9  |
| <i>let-7a</i>                   | <i>miR-16-1/15a</i> cluster     | <i>miR-489</i>                  | 10 |
| <i>miR-24-2/27a/23a</i> cluster | <i>miR-10b</i>                  | <i>let-7c</i>                   | 10 |
| <i>miR-216</i>                  | <i>let-7c</i>                   | <i>miR-373</i>                  | 10 |
| <i>let-7b/miR-4763</i> cluster  | <i>miR-181c</i>                 | <i>let-7b/miR-4763</i> cluster  | 11 |
| <i>let-7c</i>                   | <i>miR-324</i>                  | <i>let-7e/miR-99b</i> cluster   | 11 |
| <i>miR-16-1/15a</i> cluster     | <i>miR-324</i>                  | <i>miR-181a</i>                 | 11 |
| <i>miR-99a</i>                  | <i>miR-376a</i>                 | <i>miR-451/144/4732</i> cluster | 11 |
| <i>let-7e/miR-99b</i> cluster   | <i>miR-34a</i>                  | <i>miR-128b</i>                 | 11 |
| <i>miR-324</i>                  | <i>miR-10b</i>                  | <i>miR-199b/3154</i> cluster    | 11 |
| <i>miR-376a</i>                 | <i>let-7e/miR-99b</i> cluster   | <i>miR-128b</i>                 | 11 |
| <i>miR-429</i>                  | <i>miR-324</i>                  | <i>let-7d</i>                   | 11 |
| <i>miR-451/144/4732</i> cluster | <i>miR-324</i>                  | <i>miR-488</i>                  | 11 |
| <i>miR-451/144/4732</i> cluster | <i>miR-24-2/27a/23a</i> cluster | <i>miR-29b</i>                  | 11 |
| <i>miR-128b</i>                 | <i>miR-10b</i>                  | <i>miR-212</i>                  | 12 |
| <i>miR-324</i>                  | <i>miR-128b</i>                 | <i>miR-216</i>                  | 12 |
| <i>miR-376a</i>                 | <i>miR-376a</i>                 | <i>miR-129-2</i>                | 12 |
| <i>miR-451/144/4732</i> cluster | <i>miR-708</i>                  | <i>miR-489</i>                  | 12 |
| <i>miR-489</i>                  | <i>miR-489</i>                  | <i>miR-15b/16-2</i> cluster     | 12 |
| <i>miR-181c</i>                 | <i>miR-429</i>                  | <i>let-7i</i>                   | 13 |
| <i>let-7i</i>                   | <i>miR-181c</i>                 | <i>miR-188</i>                  | 13 |
| <i>miR-24-2/27a/23a</i> cluster | <i>miR-451/144/4732</i> cluster | <i>let-7a</i>                   | 13 |
| <i>miR-328</i>                  | <i>miR-451/144/4732</i> cluster | <i>let-7i</i>                   | 13 |
| <i>miR-451/144/4732</i> cluster | <i>miR-126</i>                  | <i>miR-373</i>                  | 13 |
| <i>miR-181a</i>                 | <i>miR-376a</i>                 | <i>miR-126</i>                  | 14 |
| <i>miR-188</i>                  | <i>miR-376a</i>                 | <i>miR-132</i>                  | 14 |
| <i>miR-212</i>                  | <i>miR-24-2/27a/23a</i> cluster | <i>let-7i</i>                   | 14 |
| <i>miR-212</i>                  | <i>miR-451/144/4732</i> cluster | <i>miR-708</i>                  | 14 |
| <i>miR-324</i>                  | <i>miR-181a</i>                 | <i>miR-451/144/4732</i> cluster | 14 |
| <i>miR-376a</i>                 | <i>miR-9-1</i>                  | <i>miR-24-2/27a/23a</i> cluster | 14 |
| <i>miR-376a</i>                 | <i>miR-376a</i>                 | <i>miR-126</i>                  | 14 |
| <i>miR-708</i>                  | <i>miR-328</i>                  | <i>miR-29a</i>                  | 14 |
| <i>let-7i</i>                   | <i>miR-199b/3154</i> cluster    | <i>miR-451/144/4732</i> cluster | 14 |
| <i>miR-31</i>                   | <i>let-7a</i>                   | <i>miR-708</i>                  | 14 |
| <i>miR-451/144/4732</i> cluster | <i>miR-16-1/15a</i> cluster     | <i>let-7e/miR-99b</i> cluster   | 14 |
| <i>miR-10b</i>                  | <i>miR-34a</i>                  | <i>miR-328</i>                  | 14 |
| <i>let-7a</i>                   | <i>miR-489</i>                  | <i>miR-376a</i>                 | 15 |
| <i>let-7e/miR-99b</i> cluster   | <i>miR-16-1/15a</i> cluster     | <i>miR-15b/16-2</i> cluster     | 15 |
| <i>miR-376a</i>                 | <i>miR-212</i>                  | <i>miR-181c</i>                 | 15 |
| <i>miR-24-2/27a/23a</i> cluster | <i>miR-196</i>                  | <i>miR-451/144/4732</i> cluster | 15 |
| <i>miR-373</i>                  | <i>miR-129-2</i>                | <i>miR-29a</i>                  | 15 |

|                                 |                                 |                                 |    |
|---------------------------------|---------------------------------|---------------------------------|----|
| <i>let-7b/miR-4763</i> cluster  | <i>miR-15b/16-2</i> cluster     | <i>miR-376a</i>                 | 16 |
| <i>let-7c</i>                   | <i>miR-31</i>                   | <i>miR-99a</i>                  | 16 |
| <i>miR-376a</i>                 | <i>miR-324</i>                  | <i>miR-489</i>                  | 16 |
| <i>miR-451/144/4732</i> cluster | <i>miR-324</i>                  | <i>miR-324</i>                  | 16 |
| <i>let-7b/miR-4763</i> cluster  | <i>miR-29a</i>                  | <i>miR-376a</i>                 | 17 |
| <i>miR-31</i>                   | <i>miR-10b</i>                  | <i>miR-328</i>                  | 17 |
| <i>miR-126</i>                  | <i>miR-211</i>                  | <i>miR-34a</i>                  | 17 |
| <i>miR-199b/3154</i> cluster    | <i>miR-488</i>                  | <i>miR-181a</i>                 | 17 |
| <i>miR-429</i>                  | <i>miR-15b/16-2</i> cluster     | <i>miR-181c</i>                 | 17 |
| <i>miR-9-1</i>                  | <i>miR-376a</i>                 | <i>miR-328</i>                  | 18 |
| <i>let-7i</i>                   | <i>miR-29b</i>                  | <i>miR-29a</i>                  | 18 |
| <i>let-7i</i>                   | <i>miR-451/144/4732</i> cluster | <i>let-7e/miR-99b</i> cluster   | 18 |
| <i>miR-29b</i>                  | <i>miR-451/144/4732</i> cluster | <i>miR-376a</i>                 | 19 |
| <i>miR-128b</i>                 | <i>miR-181c</i>                 | <i>miR-15b/16-2</i> cluster     | 19 |
| <i>miR-376a</i>                 | <i>let-7e/miR-99b</i> cluster   | <i>miR-16-1/15a</i> cluster     | 19 |
| <i>miR-376a</i>                 | <i>miR-708</i>                  | <i>let-7e/miR-99b</i> cluster   | 19 |
| <i>let-7i</i>                   | <i>miR-16-1/15a</i> cluster     | <i>miR-129-2</i>                | 19 |
| <i>let-7i</i>                   | <i>miR-212</i>                  | <i>miR-29a</i>                  | 19 |
| <i>miR-24-2/27a/23a</i> cluster | <i>let-7a</i>                   | <i>miR-31</i>                   | 19 |
| <i>let-7a</i>                   | <i>miR-10b</i>                  | <i>miR-324</i>                  | 20 |
| <i>miR-373</i>                  | <i>miR-181c</i>                 | <i>miR-24-2/27a/23a</i> cluster | 20 |
| <i>miR-15b/16-2</i> cluster     | <i>miR-451/144/4732</i> cluster | <i>miR-708</i>                  | 21 |
| <i>miR-128b</i>                 | <i>let-7e/miR-99b</i> cluster   | <i>miR-31</i>                   | 22 |
| <i>let-7i</i>                   | <i>miR-29a</i>                  | <i>miR-328</i>                  | 22 |
| <i>miR-196</i>                  | <i>miR-128b</i>                 | <i>miR-451/144/4732</i> cluster | 22 |
| <i>miR-429</i>                  | <i>miR-10b</i>                  | <i>miR-429</i>                  | 22 |
| <i>miR-489</i>                  | <i>miR-376a</i>                 | <i>miR-34a</i>                  | 22 |
| <i>miR-99a</i>                  | <i>miR-128b</i>                 | <i>miR-376a</i>                 | 23 |
| <i>miR-324</i>                  | <i>miR-181a</i>                 | <i>miR-29b</i>                  | 23 |
| <i>miR-211</i>                  | <i>miR-324</i>                  | <i>miR-429</i>                  | 23 |
| <i>miR-373</i>                  | <i>miR-188</i>                  | <i>miR-10b</i>                  | 23 |
| <i>miR-31</i>                   | <i>miR-489</i>                  | <i>miR-373</i>                  | 24 |
| <i>miR-10b</i>                  | <i>miR-373</i>                  | <i>miR-16-1/15a</i> cluster     | 24 |
| <i>miR-29a</i>                  | <i>miR-376a</i>                 | <i>let-7i</i>                   | 25 |
| <i>miR-24-2/27a/23a</i> cluster | <i>let-7d</i>                   | <i>let-7i</i>                   | 26 |
| <i>miR-196</i>                  | <i>let-7e/miR-99b</i> cluster   | <i>miR-181a</i>                 | 26 |
| <i>miR-373</i>                  | <i>miR-29b</i>                  | <i>let-7i</i>                   | 26 |
| <i>miR-10b</i>                  | <i>miR-199b/3154</i> cluster    | <i>miR-15b/16-2</i> cluster     | 26 |
| <i>miR-212</i>                  | <i>miR-29b</i>                  | <i>miR-181c</i>                 | 27 |
| <i>miR-451/144/4732</i> cluster | <i>miR-199b/3154</i> cluster    | <i>miR-373</i>                  | 28 |
| <i>miR-199b/3154</i> cluster    | <i>miR-34a</i>                  | <i>miR-181c</i>                 | 30 |
| <i>miR-324</i>                  | <i>miR-489</i>                  | <i>miR-29b</i>                  | 31 |
| <i>miR-488</i>                  | <i>miR-29b</i>                  | <i>miR-376a</i>                 | 31 |
| <i>miR-489</i>                  | <i>miR-489</i>                  | <i>miR-181a</i>                 | 31 |
| <i>miR-181a</i>                 | <i>miR-34a</i>                  | <i>miR-24-2/27a/23a</i> cluster | 32 |
| <i>miR-29a</i>                  | <i>miR-708</i>                  | <i>miR-31</i>                   | 34 |
| <i>miR-15b/16-2</i> cluster     | <i>miR-31</i>                   | <i>miR-489</i>                  | 34 |
| <i>miR-196</i>                  | <i>miR-24-2/27a/23a</i> cluster | <i>miR-181a</i>                 | 34 |
| <i>miR-128b</i>                 | <i>miR-181c</i>                 | <i>miR-181a</i>                 | 36 |
| <i>miR-212</i>                  | <i>miR-488</i>                  | <i>miR-16-1/15a</i> cluster     | 36 |
| <i>miR-324</i>                  | <i>miR-376a</i>                 | <i>miR-212</i>                  | 36 |
| <i>miR-24-2/27a/23a</i> cluster | <i>miR-199b/3154</i> cluster    | <i>miR-29b</i>                  | 36 |
| <i>miR-451/144/4732</i> cluster | <i>let-7i</i>                   | <i>miR-132</i>                  | 36 |

|                                 |                                 |                                 |    |
|---------------------------------|---------------------------------|---------------------------------|----|
| <i>miR-324</i>                  | <i>miR-489</i>                  | <i>miR-376a</i>                 | 37 |
| <i>miR-708</i>                  | <i>miR-181c</i>                 | <i>miR-181a</i>                 | 38 |
| <i>miR-211</i>                  | <i>miR-31</i>                   | <i>miR-181c</i>                 | 38 |
| <i>miR-16-1/15a</i> cluster     | <i>miR-10b</i>                  | <i>miR-489</i>                  | 39 |
| <i>miR-489</i>                  | <i>miR-29a</i>                  | <i>miR-99a</i>                  | 39 |
| <i>miR-9-1</i>                  | <i>miR-10b</i>                  | <i>miR-128b</i>                 | 41 |
| <i>miR-328</i>                  | <i>miR-31</i>                   | <i>miR-24-2/27a/23a</i> cluster | 41 |
| <i>miR-181c</i>                 | <i>miR-211</i>                  | <i>let-7c</i>                   | 42 |
| <i>miR-31</i>                   | <i>miR-132</i>                  | <i>miR-181a</i>                 | 43 |
| <i>miR-181c</i>                 | <i>miR-34a</i>                  | <i>miR-211</i>                  | 44 |
| <i>miR-132</i>                  | <i>miR-211</i>                  | <i>miR-15b/16-2</i> cluster     | 45 |
| <i>miR-212</i>                  | <i>miR-29b</i>                  | <i>miR-29a</i>                  | 45 |
| <i>miR-132</i>                  | <i>miR-31</i>                   | <i>miR-29b</i>                  | 46 |
| <i>miR-212</i>                  | <i>miR-29c</i>                  | <i>miR-10b</i>                  | 46 |
| <i>miR-15b/16-2</i> cluster     | <i>miR-373</i>                  | <i>miR-199b/3154</i> cluster    | 47 |
| <i>miR-10b</i>                  | <i>miR-451/144/4732</i> cluster | <i>miR-128b</i>                 | 47 |
| <i>miR-429</i>                  | <i>let-7c</i>                   | <i>miR-10b</i>                  | 48 |
| <i>miR-10b</i>                  | <i>miR-29a</i>                  | <i>miR-373</i>                  | 48 |
| <i>miR-196</i>                  | <i>miR-376a</i>                 | <i>let-7e/miR-99b</i> cluster   | 49 |
| <i>miR-489</i>                  | <i>miR-324</i>                  | <i>let-7d</i>                   | 49 |
| <i>miR-16-1/15a</i> cluster     | <i>miR-328</i>                  | <i>miR-376a</i>                 | 50 |
| <i>miR-99a</i>                  | <i>miR-29a</i>                  | <i>miR-373</i>                  | 51 |
| <i>miR-216</i>                  | <i>let-7i</i>                   | <i>miR-488</i>                  | 52 |
| <i>miR-451/144/4732</i> cluster | <i>miR-376a</i>                 | <i>miR-15b/16-2</i> cluster     | 52 |
| <i>miR-181a</i>                 | <i>miR-181c</i>                 | <i>miR-376a</i>                 | 54 |
| <i>miR-128b</i>                 | <i>miR-489</i>                  | <i>miR-199b/3154</i> cluster    | 55 |
| <i>miR-376a</i>                 | <i>miR-216</i>                  | <i>miR-9-1</i>                  | 59 |
| <i>miR-10b</i>                  | <i>miR-429</i>                  | <i>let-7c</i>                   | 59 |
| <i>miR-216</i>                  | <i>miR-451/144/4732</i> cluster | <i>let-7a</i>                   | 60 |
| <i>miR-16-1/15a</i> cluster     | <i>miR-373</i>                  | <i>let-7a</i>                   | 62 |
| <i>let-7e/miR-99b</i> cluster   | <i>miR-324</i>                  | <i>miR-31</i>                   | 62 |
| <i>miR-196</i>                  | <i>miR-376a</i>                 | <i>miR-126</i>                  | 63 |
| <i>let-7e/miR-99b</i> cluster   | <i>miR-128b</i>                 | <i>let-7e/miR-99b</i> cluster   | 68 |
| <i>let-7i</i>                   | <i>miR-29a</i>                  | <i>let-7b/miR-4763</i> cluster  | 68 |
| <i>miR-708</i>                  | <i>miR-128b</i>                 | <i>miR-10b</i>                  | 70 |
| <i>miR-324</i>                  | <i>let-7i</i>                   | <i>miR-93/106b</i> cluster      | 71 |
| <i>miR-10b</i>                  | <i>miR-16-1/15a</i> cluster     | <i>miR-212</i>                  | 71 |
| <i>miR-31</i>                   | <i>miR-489</i>                  | <i>miR-489</i>                  | 75 |
| <i>miR-10b</i>                  | <i>miR-10b</i>                  | <i>miR-126</i>                  | 75 |
| <i>miR-429</i>                  | <i>miR-216</i>                  | <i>miR-181c</i>                 | 76 |
| <i>miR-196</i>                  | <i>miR-181a</i>                 | <i>miR-15b/16-2</i> cluster     | 78 |
| <i>miR-128b</i>                 | <i>miR-16-1/15a</i> cluster     | <i>miR-373</i>                  | 81 |
| <i>miR-15b/16-2</i> cluster     | <i>miR-24-2/27a/23a</i> cluster | <i>miR-181a</i>                 | 81 |
| <i>miR-373</i>                  | <i>miR-429</i>                  | <i>miR-181a</i>                 | 81 |
| <i>miR-199b/3154</i> cluster    | <i>let-7d</i>                   | <i>miR-376a</i>                 | 82 |
| <i>miR-24-2/27a/23a</i> cluster | <i>let-7a</i>                   | <i>miR-128b</i>                 | 86 |
| <i>miR-181c</i>                 | <i>miR-451/144/4732</i> cluster | <i>miR-129-2</i>                | 87 |
| <i>let-7i</i>                   | <i>miR-196</i>                  | <i>miR-181a</i>                 | 88 |
| <i>miR-29a</i>                  | <i>miR-181c</i>                 | <i>miR-181a</i>                 | 89 |
| <i>miR-489</i>                  | <i>miR-34a</i>                  | <i>miR-451/144/4732</i> cluster | 91 |
| <i>miR-451/144/4732</i> cluster | <i>miR-199b/3154</i> cluster    | <i>miR-181a</i>                 | 92 |
| <i>miR-451/144/4732</i> cluster | <i>let-7b/miR-4763</i> cluster  | <i>miR-376a</i>                 | 93 |
| <i>miR-132</i>                  | <i>miR-181a</i>                 | <i>let-7d</i>                   | 95 |

|                                 |                                 |                                 |     |
|---------------------------------|---------------------------------|---------------------------------|-----|
| <i>miR-132</i>                  | <i>let-7e/miR-99b</i> cluster   | <i>miR-10b</i>                  | 97  |
| <i>miR-196</i>                  | <i>miR-489</i>                  | <i>miR-216</i>                  | 97  |
| <i>miR-29a</i>                  | <i>let-7e/miR-99b</i> cluster   | <i>miR-708</i>                  | 99  |
| <i>miR-24-2/27a/23a</i> cluster | <i>miR-24-2/27a/23a</i> cluster | <i>miR-16-1/15a</i> cluster     | 99  |
| <i>miR-29a</i>                  | <i>miR-429</i>                  | <i>miR-373</i>                  | 104 |
| <i>miR-10b</i>                  | <i>miR-373</i>                  | <i>miR-324</i>                  | 106 |
| <i>miR-10b</i>                  | <i>miR-24-2/27a/23a</i> cluster | <i>miR-181a</i>                 | 109 |
| <i>miR-31</i>                   | <i>miR-181c</i>                 | <i>miR-181a</i>                 | 117 |
| <i>miR-29b</i>                  | <i>miR-16-1/15a</i> cluster     | <i>miR-708</i>                  | 120 |
| <i>miR-24-2/27a/23a</i> cluster | <i>miR-181c</i>                 | <i>miR-188</i>                  | 120 |
| <i>miR-373</i>                  | <i>miR-489</i>                  | <i>miR-216</i>                  | 140 |
| <i>miR-181c</i>                 | <i>miR-93/106b</i> cluster      | <i>miR-199b/3154</i> cluster    | 150 |
| <i>miR-29a</i>                  | <i>miR-211</i>                  | <i>miR-181a</i>                 | 155 |
| <i>miR-31</i>                   | <i>miR-16-1/15a</i> cluster     | <i>miR-93/106b</i> cluster      | 157 |
| <i>miR-93/106b</i> cluster      | <i>miR-128b</i>                 | <i>miR-10b</i>                  | 159 |
| <i>miR-488</i>                  | <i>miR-15b/16-2</i> cluster     | <i>miR-181a</i>                 | 160 |
| <i>let-7b/miR-4763</i> cluster  | <i>miR-181c</i>                 | <i>miR-181a</i>                 | 188 |
| <i>miR-9-1</i>                  | <i>miR-34a</i>                  | <i>miR-181c</i>                 | 194 |
| <i>miR-29a</i>                  | <i>miR-29b</i>                  | <i>miR-29a</i>                  | 195 |
| <i>miR-16-1/15a</i> cluster     | <i>miR-9-1</i>                  | <i>miR-373</i>                  | 203 |
| <i>miR-31</i>                   | <i>miR-34a</i>                  | <i>miR-181a</i>                 | 270 |
| <i>miR-373</i>                  | <i>miR-181c</i>                 | <i>miR-216</i>                  | 299 |
| <i>miR-196</i>                  | <i>miR-188</i>                  | <i>miR-31</i>                   | 301 |
| <i>miR-15b/16-2</i> cluster     | <i>miR-93/106b</i> cluster      | <i>miR-451/144/4732</i> cluster | 317 |

**Supplementary Table 5** List of Two-Wise miRNA Hits that Increase Docetaxel Sensitivity in OVCAR8-ADR Cells Based on Pooled Screening

| <i>miR-A</i>                    | <i>miR-B</i>                    | Log <sub>2</sub> ratio – Drug/Vehicle | Q-value  |
|---------------------------------|---------------------------------|---------------------------------------|----------|
| <i>miR-376a</i>                 | <i>miR-16-1/15a</i> cluster     | -0.92                                 | 2.10E-06 |
| <i>miR-216</i>                  | <i>miR-181c</i>                 | -0.89                                 | 2.10E-06 |
| <i>miR-31</i>                   | <i>miR-181a</i>                 | -0.88                                 | 2.93E-06 |
| <i>miR-376a</i>                 | <i>miR-212</i>                  | -0.73                                 | 2.80E-04 |
| <i>let-7i</i>                   | <i>miR-181a</i>                 | -0.70                                 | 5.11E-04 |
| <i>miR-93/106b</i> cluster      | <i>miR-16-1/15a</i> cluster     | -0.66                                 | 1.15E-03 |
| <i>miR-181a</i>                 | <i>miR-93/106b</i> cluster      | -0.64                                 | 2.21E-03 |
| <i>miR-15b/miR-16-2</i> cluster | <i>miR-9-1</i>                  | -0.62                                 | 2.93E-03 |
| <i>miR-373</i>                  | <i>miR-181a</i>                 | -0.62                                 | 3.07E-03 |
| <i>miR-16-1/15a</i> cluster     | <i>let-7a</i>                   | -0.58                                 | 6.70E-03 |
| <i>miR-10b</i>                  | <i>miR-16-1/15a</i> cluster     | -0.57                                 | 7.76E-03 |
| <i>miR-216</i>                  | <i>miR-15b/miR-16-2</i> cluster | -0.56                                 | 8.36E-03 |

**Supplementary Table 6** List of Two-Wise miRNA Hits that Increase Docetaxel Resistance in OVCAR8-ADR Cells Based on Pooled Screening

| <i>miR-A</i>                    | <i>miR-B</i>                   | Log <sub>2</sub> ratio – Drug/Vehicle | Q-value  |
|---------------------------------|--------------------------------|---------------------------------------|----------|
| <i>miR-199b/3154</i> cluster    | <i>miR-34a</i>                 | 0.68                                  | 1.99E-04 |
| <i>miR-24-2/27a/23a</i> cluster | <i>miR-93/106b</i> cluster     | 0.64                                  | 4.68E-04 |
| <i>miR-93/106b</i> cluster      | <i>miR-34a</i>                 | 0.62                                  | 6.60E-04 |
| <i>miR-24-2/27a/23a</i> cluster | <i>miR-34a</i>                 | 0.62                                  | 6.60E-04 |
| <i>miR-376a</i>                 | <i>miR-29b</i>                 | 0.61                                  | 1.04E-03 |
| <i>miR-126</i>                  | <i>miR-34a</i>                 | 0.59                                  | 1.28E-03 |
| <i>miR-196</i>                  | <i>miR-34a</i>                 | 0.55                                  | 3.55E-03 |
| <i>miR-328</i>                  | <i>miR-34a</i>                 | 0.54                                  | 3.58E-03 |
| <i>miR-34a</i>                  | <i>miR-29a</i>                 | 0.52                                  | 6.70E-03 |
| <i>miR-34a</i>                  | <i>miR-29c</i>                 | 0.51                                  | 6.70E-03 |
| <i>miR-128b</i>                 | <i>miR-34a</i>                 | 0.51                                  | 7.09E-03 |
| <i>miR-129-2</i>                | <i>miR-34a</i>                 | 0.50                                  | 8.46E-03 |
| <i>miR-29b</i>                  | <i>miR-16-1/15a</i> cluster    | 0.48                                  | 1.33E-02 |
| <i>miR-429</i>                  | <i>miR-93/106b</i> cluster     | 0.47                                  | 1.51E-02 |
| <i>miR-34a</i>                  | <i>let-7b/miR-4763</i> cluster | 0.46                                  | 1.84E-02 |
| <i>miR-199b/3154</i> cluster    | <i>miR-93/106b</i> cluster     | 0.46                                  | 2.06E-02 |
| <i>miR-429</i>                  | <i>miR-34a</i>                 | 0.44                                  | 2.90E-02 |

**Supplementary Table 7** List of Three-Wise miRNA Hits that Increase Docetaxel Sensitivity in OVCAR8-ADR Cells Based on Pooled Screening

| <i>miR-A</i>                    | <i>miR-B</i>                          | <i>miR-C</i>                          | Log <sub>2</sub> ratio – Drug/Vehicle | Q-value  |
|---------------------------------|---------------------------------------|---------------------------------------|---------------------------------------|----------|
| <i>miR-16-1/15a</i> cluster     | <i>miR-29a</i>                        | <i>miR-181c</i>                       | -0.95                                 | 2.91E-17 |
| <i>miR-129-2</i>                | <i>miR-181c</i>                       | <i>miR-324</i>                        | -0.94                                 | 5.41E-17 |
| <i>let-7c</i>                   | <i>miR-29a</i>                        | <i>miR-199b/3154</i> cluster          | -0.83                                 | 6.45E-13 |
| <i>miR-181a</i>                 | <i>miR-126</i>                        | <i>miR-451a/451b/144/4732</i> cluster | -0.80                                 | 6.96E-12 |
| <i>miR-181a</i>                 | <i>miR-181c</i>                       | <i>miR-199b/3154</i> cluster          | -0.77                                 | 3.57E-11 |
| <i>let-7e/miR-99b</i> cluster   | <i>miR-328</i>                        | <i>miR-451a/451b/144/4732</i> cluster | -0.76                                 | 1.04E-10 |
| <i>miR-9-1</i>                  | <i>miR-376a</i>                       | <i>miR-451a/451b/144/4732</i> cluster | -0.70                                 | 6.35E-09 |
| <i>miR-16-1/15a</i> cluster     | <i>miR-15b/miR-16-2</i> cluster       | <i>miR-429</i>                        | -0.66                                 | 5.82E-08 |
| <i>miR-324</i>                  | <i>miR-24-2/27a/23a</i> cluster       | <i>miR-373</i>                        | -0.66                                 | 6.29E-08 |
| <i>let-7c</i>                   | <i>miR-128b</i>                       | <i>miR-10b</i>                        | -0.65                                 | 9.75E-08 |
| <i>miR-29a</i>                  | <i>let-7i</i>                         | <i>miR-199b/3154</i> cluster          | -0.63                                 | 5.32E-07 |
| <i>miR-16-1/15a</i> cluster     | <i>miR-126</i>                        | <i>miR-216</i>                        | -0.62                                 | 9.33E-07 |
| <i>miR-16-1/15a</i> cluster     | <i>miR-15b/miR-16-2</i> cluster       | <i>miR-216</i>                        | -0.61                                 | 1.14E-06 |
| <i>miR-708</i>                  | <i>miR-451a/451b/144/4732</i> cluster | <i>miR-10b</i>                        | -0.61                                 | 1.53E-06 |
| <i>miR-29a</i>                  | <i>miR-181a</i>                       | <i>miR-488</i>                        | -0.59                                 | 4.53E-06 |
| <i>miR-181a</i>                 | <i>let-7i</i>                         | <i>miR-216</i>                        | -0.59                                 | 4.70E-06 |
| <i>miR-16-1/15a</i> cluster     | <i>miR-128b</i>                       | <i>miR-181c</i>                       | -0.58                                 | 5.56E-06 |
| <i>let-7d</i>                   | <i>miR-181c</i>                       | <i>miR-10b</i>                        | -0.58                                 | 6.48E-06 |
| <i>miR-181a</i>                 | <i>miR-216</i>                        | <i>miR-489</i>                        | -0.57                                 | 8.46E-06 |
| <i>miR-324</i>                  | <i>miR-376a</i>                       | <i>miR-15b/miR-16-2</i> cluster       | -0.55                                 | 2.61E-05 |
| <i>miR-708</i>                  | <i>miR-373</i>                        | <i>miR-451a/451b/144/4732</i> cluster | -0.55                                 | 2.78E-05 |
| <i>miR-181c</i>                 | <i>miR-196</i>                        | <i>miR-451a/451b/144/4732</i> cluster | -0.55                                 | 3.41E-05 |
| <i>miR-181a</i>                 | <i>miR-324</i>                        | <i>miR-708</i>                        | -0.55                                 | 3.55E-05 |
| <i>miR-16-1/15a</i> cluster     | <i>miR-451a/451b/144/4732</i> cluster | <i>miR-489</i>                        | -0.54                                 | 3.55E-05 |
| <i>let-7a</i>                   | <i>miR-16-1/15a</i> cluster           | <i>miR-199b/3154</i> cluster          | -0.54                                 | 3.55E-05 |
| <i>miR-16-1/15a</i> cluster     | <i>let-7e/miR-99b</i> cluster         | <i>miR-15b/miR-16-2</i> cluster       | -0.54                                 | 3.72E-05 |
| <i>let-7c</i>                   | <i>miR-376a</i>                       | <i>miR-451a/451b/144/4732</i> cluster | -0.54                                 | 3.72E-05 |
| <i>miR-181c</i>                 | <i>miR-212</i>                        | <i>miR-376a</i>                       | -0.54                                 | 3.72E-05 |
| <i>miR-9-1</i>                  | <i>miR-29a</i>                        | <i>miR-181c</i>                       | -0.54                                 | 3.89E-05 |
| <i>miR-15b/miR-16-2</i> cluster | <i>miR-31</i>                         | <i>miR-196</i>                        | -0.54                                 | 5.20E-05 |
| <i>miR-128b</i>                 | <i>miR-24-2/27a/23a</i> cluster       | <i>miR-31</i>                         | -0.53                                 | 5.53E-05 |
| <i>let-7c</i>                   | <i>miR-324</i>                        | <i>miR-451a/451b/144/4732</i> cluster | -0.53                                 | 5.69E-05 |
| <i>miR-128b</i>                 | <i>miR-188</i>                        | <i>miR-324</i>                        | -0.53                                 | 6.87E-05 |
| <i>miR-181a</i>                 | <i>miR-15b/miR-16-2</i> cluster       | <i>miR-489</i>                        | -0.53                                 | 7.53E-05 |
| <i>miR-429</i>                  | <i>miR-451a/451b/144/4732</i> cluster | <i>miR-10b</i>                        | -0.52                                 | 9.97E-05 |
| <i>miR-16-1/15a</i> cluster     | <i>miR-376a</i>                       | <i>miR-31</i>                         | -0.51                                 | 1.35E-04 |
| <i>let-7e/miR-99b</i> cluster   | <i>miR-181a</i>                       | <i>miR-324</i>                        | -0.51                                 | 1.48E-04 |
| <i>let-7e/miR-99b</i> cluster   | <i>miR-188</i>                        | <i>miR-376a</i>                       | -0.51                                 | 1.49E-04 |



|                                 |                                 |                                       |       |          |
|---------------------------------|---------------------------------|---------------------------------------|-------|----------|
| <i>miR-128b</i>                 | <i>miR-324</i>                  | <i>miR-216</i>                        | -0.51 | 1.59E-04 |
| <i>miR-93/106b</i> cluster      | <i>miR-181c</i>                 | <i>miR-373</i>                        | -0.51 | 1.59E-04 |
| <i>miR-181a</i>                 | <i>miR-15b/miR-16-2</i> cluster | <i>miR-126</i>                        | -0.50 | 2.27E-04 |
| <i>miR-181c</i>                 | <i>miR-15b/miR-16-2</i> cluster | <i>miR-328</i>                        | -0.50 | 2.27E-04 |
| <i>miR-181a</i>                 | <i>miR-488</i>                  | <i>miR-15b/miR-16-2</i> cluster       | -0.50 | 2.27E-04 |
| <i>miR-29c</i>                  | <i>miR-181a</i>                 | <i>miR-376a</i>                       | -0.50 | 2.38E-04 |
| <i>let-7c</i>                   | <i>let-7i</i>                   | <i>miR-15b/miR-16-2</i> cluster       | -0.50 | 2.38E-04 |
| <i>miR-708</i>                  | <i>miR-15b/miR-16-2</i> cluster | <i>miR-451a/451b/144/4732</i> cluster | -0.50 | 2.38E-04 |
| <i>miR-181c</i>                 | <i>miR-488</i>                  | <i>miR-15b/miR-16-2</i> cluster       | -0.50 | 2.49E-04 |
| <i>let-7e/miR-99b</i> cluster   | <i>miR-181a</i>                 | <i>miR-15b/miR-16-2</i> cluster       | -0.49 | 3.10E-04 |
| <i>miR-181a</i>                 | <i>miR-376a</i>                 | <i>miR-24-2/27a/23a</i> cluster       | -0.49 | 3.68E-04 |
| <i>miR-376a</i>                 | <i>miR-488</i>                  | <i>miR-31</i>                         | -0.49 | 3.95E-04 |
| <i>miR-181c</i>                 | <i>miR-376a</i>                 | <i>miR-708</i>                        | -0.48 | 4.94E-04 |
| <i>miR-128b</i>                 | <i>miR-15b/miR-16-2</i> cluster | <i>miR-489</i>                        | -0.48 | 4.94E-04 |
| <i>miR-16-1/15a</i> cluster     | <i>miR-15b/miR-16-2</i> cluster | <i>miR-451a/451b/144/4732</i> cluster | -0.48 | 5.13E-04 |
| <i>miR-9-1</i>                  | <i>miR-181c</i>                 | <i>miR-451a/451b/144/4732</i> cluster | -0.48 | 5.89E-04 |
| <i>miR-29c</i>                  | <i>miR-181c</i>                 | <i>miR-31</i>                         | -0.47 | 6.45E-04 |
| <i>miR-29a</i>                  | <i>miR-181c</i>                 | <i>miR-126</i>                        | -0.47 | 6.84E-04 |
| <i>miR-708</i>                  | <i>let-7i</i>                   | <i>miR-429</i>                        | -0.47 | 7.16E-04 |
| <i>miR-29a</i>                  | <i>miR-126</i>                  | <i>miR-211</i>                        | -0.47 | 7.52E-04 |
| <i>miR-16-1/15a</i> cluster     | <i>miR-128b</i>                 | <i>miR-31</i>                         | -0.47 | 7.54E-04 |
| <i>miR-132</i>                  | <i>miR-181c</i>                 | <i>miR-488</i>                        | -0.47 | 7.63E-04 |
| <i>miR-376a</i>                 | <i>miR-15b/miR-16-2</i> cluster | <i>miR-24-2/27a/23a</i> cluster       | -0.47 | 7.63E-04 |
| <i>let-7a</i>                   | <i>miR-15b/miR-16-2</i> cluster | <i>miR-451a/451b/144/4732</i> cluster | -0.47 | 7.85E-04 |
| <i>miR-16-1/15a</i> cluster     | <i>miR-328</i>                  | <i>miR-451a/451b/144/4732</i> cluster | -0.47 | 7.85E-04 |
| <i>miR-99a</i>                  | <i>miR-181c</i>                 | <i>miR-31</i>                         | -0.46 | 8.69E-04 |
| <i>miR-16-1/15a</i> cluster     | <i>miR-181c</i>                 | <i>miR-489</i>                        | -0.46 | 8.92E-04 |
| <i>let-7e/miR-99b</i> cluster   | <i>miR-376a</i>                 | <i>miR-199b/3154</i> cluster          | -0.46 | 9.02E-04 |
| <i>miR-128b</i>                 | <i>miR-376a</i>                 | <i>miR-373</i>                        | -0.46 | 1.07E-03 |
| <i>miR-9-1</i>                  | <i>miR-29a</i>                  | <i>miR-451a/451b/144/4732</i> cluster | -0.46 | 1.07E-03 |
| <i>miR-376a</i>                 | <i>miR-24-2/27a/23a</i> cluster | <i>miR-328</i>                        | -0.46 | 1.07E-03 |
| <i>miR-181a</i>                 | <i>miR-324</i>                  | <i>miR-31</i>                         | -0.46 | 1.14E-03 |
| <i>miR-16-1/15a</i> cluster     | <i>miR-181c</i>                 | <i>miR-211</i>                        | -0.45 | 1.25E-03 |
| <i>miR-16-1/15a</i> cluster     | <i>let-7i</i>                   | <i>miR-196</i>                        | -0.45 | 1.53E-03 |
| <i>miR-15b/miR-16-2</i> cluster | <i>miR-126</i>                  | <i>miR-10b</i>                        | -0.45 | 1.61E-03 |
| <i>miR-29c</i>                  | <i>miR-181c</i>                 | <i>miR-324</i>                        | -0.45 | 1.67E-03 |
| <i>let-7e/miR-99b</i> cluster   | <i>miR-181c</i>                 | <i>miR-429</i>                        | -0.44 | 1.75E-03 |
| <i>miR-181c</i>                 | <i>miR-126</i>                  | <i>miR-451a/451b/144/4732</i> cluster | -0.44 | 1.87E-03 |
| <i>miR-181c</i>                 | <i>miR-31</i>                   | <i>miR-328</i>                        | -0.44 | 2.03E-03 |
| <i>miR-9-1</i>                  | <i>miR-15b/miR-16-2</i> cluster | <i>miR-373</i>                        | -0.44 | 2.06E-03 |
| <i>let-7d</i>                   | <i>miR-29a</i>                  | <i>miR-15b/miR-16-2</i> cluster       | -0.43 | 2.47E-03 |
| <i>miR-16-1/15a</i> cluster     | <i>let-7e/miR-99b</i> cluster   | <i>miR-181c</i>                       | -0.43 | 2.80E-03 |
| <i>let-7i</i>                   | <i>miR-199b/3154</i> cluster    | <i>miR-10b</i>                        | -0.43 | 3.07E-03 |

**Supplementary Table 8** List of Three-Wise miRNA Hits that Increase Docetaxel Resistance in OVCAR8-ADR Cells Based on Pooled Screening

| <i>miR-A</i>     | <i>miR-B</i>                    | <i>miR-C</i>                          | Log <sub>2</sub> ratio – Drug/Vehicle | Q-value  |
|------------------|---------------------------------|---------------------------------------|---------------------------------------|----------|
| <i>miR-34a</i>   | <i>miR-376a</i>                 | <i>miR-31</i>                         | 0.67                                  | 4.31E-10 |
| <i>miR-29a</i>   | <i>miR-34a</i>                  | <i>miR-31</i>                         | 0.52                                  | 4.21E-06 |
| <i>miR-132</i>   | <i>miR-429</i>                  | <i>miR-451a/451b/144/4732</i> cluster | 0.46                                  | 6.87E-05 |
| <i>miR-34a</i>   | <i>miR-376a</i>                 | <i>let-7i</i>                         | 0.46                                  | 8.70E-05 |
| <i>miR-128b</i>  | <i>miR-181c</i>                 | <i>miR-188</i>                        | 0.45                                  | 1.33E-04 |
| <i>miR-181c</i>  | <i>miR-212</i>                  | <i>miR-31</i>                         | 0.43                                  | 2.67E-04 |
| <i>miR-34a</i>   | <i>miR-93/106b</i> cluster      | <i>miR-181c</i>                       | 0.41                                  | 5.82E-04 |
| <i>miR-34a</i>   | <i>miR-128b</i>                 | <i>miR-15b/miR-16-2</i> cluster       | 0.41                                  | 7.48E-04 |
| <i>miR-129-2</i> | <i>miR-181c</i>                 | <i>miR-376a</i>                       | 0.40                                  | 7.54E-04 |
| <i>miR-132</i>   | <i>miR-376a</i>                 | <i>miR-211</i>                        | 0.40                                  | 9.70E-04 |
| <i>miR-34a</i>   | <i>miR-376a</i>                 | <i>miR-429</i>                        | 0.39                                  | 1.08E-03 |
| <i>miR-34a</i>   | <i>miR-24-2/27a/23a</i> cluster | <i>miR-196</i>                        | 0.38                                  | 1.53E-03 |
| <i>miR-132</i>   | <i>miR-181c</i>                 | <i>miR-376a</i>                       | 0.38                                  | 1.61E-03 |
| <i>miR-29b</i>   | <i>miR-34a</i>                  | <i>miR-93/106b</i> cluster            | 0.38                                  | 1.75E-03 |
| <i>miR-34a</i>   | <i>miR-128b</i>                 | <i>miR-132</i>                        | 0.38                                  | 1.83E-03 |
| <i>miR-29b</i>   | <i>miR-376a</i>                 | <i>miR-328</i>                        | 0.38                                  | 1.87E-03 |
| <i>miR-34a</i>   | <i>miR-93/106b</i> cluster      | <i>miR-132</i>                        | 0.37                                  | 2.21E-03 |
| <i>miR-34a</i>   | <i>miR-93/106b</i> cluster      | <i>miR-199b/3154</i> cluster          | 0.37                                  | 2.47E-03 |
| <i>miR-29c</i>   | <i>miR-34a</i>                  | <i>miR-429</i>                        | 0.37                                  | 2.47E-03 |
| <i>miR-181c</i>  | <i>miR-211</i>                  | <i>miR-10b</i>                        | 0.37                                  | 2.83E-03 |
| <i>let-7a</i>    | <i>miR-212</i>                  | <i>miR-376a</i>                       | 0.36                                  | 3.14E-03 |
| <i>miR-29a</i>   | <i>let-7e/miR-99b</i> cluster   | <i>miR-31</i>                         | 0.36                                  | 3.30E-03 |
| <i>miR-34a</i>   | <i>let-7e/miR-99b</i> cluster   | <i>miR-196</i>                        | 0.36                                  | 3.36E-03 |
| <i>miR-128b</i>  | <i>miR-132</i>                  | <i>miR-31</i>                         | 0.36                                  | 3.77E-03 |
| <i>miR-34a</i>   | <i>miR-132</i>                  | <i>miR-181c</i>                       | 0.36                                  | 3.96E-03 |

**Supplementary Table 9** List of Three-Wise miRNA Hits that Inhibit OVCAR8-ADR Cell Proliferation Based on Pooled Screening

| <i>miR-A</i>                | <i>miR-B</i>                    | <i>miR-C</i>                          | <b>Log<sub>2</sub> ratio – Day 4/Day1</b> | <b>Q-value</b> |
|-----------------------------|---------------------------------|---------------------------------------|-------------------------------------------|----------------|
| <i>let-7d</i>               | <i>miR-488</i>                  | <i>let-7i</i>                         | -0.87                                     | 1.26E-21       |
| <i>miR-128b</i>             | <i>miR-212</i>                  | <i>let-7i</i>                         | -0.85                                     | 8.02E-21       |
| <i>miR-132</i>              | <i>miR-15b/miR-16-2 cluster</i> | <i>miR-31</i>                         | -0.82                                     | 2.33E-19       |
| <i>miR-708</i>              | <i>let-7i</i>                   | <i>miR-451a/451b/144/4732 cluster</i> | -0.72                                     | 1.19E-14       |
| <i>miR-181c</i>             | <i>let-7i</i>                   | <i>miR-373</i>                        | -0.70                                     | 1.38E-13       |
| <i>miR-132</i>              | <i>miR-212</i>                  | <i>miR-451a/451b/144/4732 cluster</i> | -0.64                                     | 4.46E-11       |
| <i>let-7d</i>               | <i>miR-132</i>                  | <i>miR-181c</i>                       | -0.62                                     | 1.68E-10       |
| <i>miR-9-1</i>              | <i>miR-181c</i>                 | <i>miR-324</i>                        | -0.56                                     | 2.17E-08       |
| <i>miR-29a</i>              | <i>miR-99a</i>                  | <i>miR-376a</i>                       | -0.56                                     | 2.72E-08       |
| <i>miR-128b</i>             | <i>miR-132</i>                  | <i>miR-451a/451b/144/4732 cluster</i> | -0.55                                     | 3.81E-08       |
| <i>miR-16-1/15a cluster</i> | <i>let-7e/miR-99b cluster</i>   | <i>miR-128b</i>                       | -0.51                                     | 4.60E-07       |
| <i>miR-132</i>              | <i>let-7i</i>                   | <i>miR-15b/miR-16-2 cluster</i>       | -0.51                                     | 6.15E-07       |
| <i>miR-181a</i>             | <i>let-7i</i>                   | <i>miR-15b/miR-16-2 cluster</i>       | -0.51                                     | 6.61E-07       |
| <i>miR-16-1/15a cluster</i> | <i>miR-29a</i>                  | <i>miR-488</i>                        | -0.50                                     | 1.05E-06       |
| <i>miR-34a</i>              | <i>miR-328</i>                  | <i>miR-451a/451b/144/4732 cluster</i> | -0.49                                     | 2.14E-06       |
| <i>miR-128b</i>             | <i>miR-212</i>                  | <i>miR-451a/451b/144/4732 cluster</i> | -0.48                                     | 2.64E-06       |
| <i>let-7c</i>               | <i>miR-128b</i>                 | <i>miR-376a</i>                       | -0.48                                     | 3.56E-06       |
| <i>miR-29a</i>              | <i>let-7i</i>                   | <i>miR-126</i>                        | -0.47                                     | 6.14E-06       |
| <i>miR-181c</i>             | <i>miR-212</i>                  | <i>miR-199b/3154 cluster</i>          | -0.47                                     | 7.42E-06       |
| <i>miR-29a</i>              | <i>miR-29b</i>                  | <i>miR-451a/451b/144/4732 cluster</i> | -0.47                                     | 7.65E-06       |
| <i>miR-181a</i>             | <i>miR-31</i>                   | <i>miR-429</i>                        | -0.45                                     | 1.43E-05       |
| <i>miR-34a</i>              | <i>miR-181a</i>                 | <i>miR-181c</i>                       | -0.45                                     | 1.45E-05       |
| <i>miR-181c</i>             | <i>let-7i</i>                   | <i>miR-429</i>                        | -0.45                                     | 1.73E-05       |
| <i>miR-29a</i>              | <i>miR-181a</i>                 | <i>miR-429</i>                        | -0.44                                     | 2.57E-05       |
| <i>miR-181a</i>             | <i>miR-24-2/27a/23a cluster</i> | <i>miR-451a/451b/144/4732 cluster</i> | -0.44                                     | 2.88E-05       |
| <i>miR-34a</i>              | <i>miR-324</i>                  | <i>miR-376a</i>                       | -0.44                                     | 3.30E-05       |
| <i>miR-128b</i>             | <i>let-7i</i>                   | <i>miR-196</i>                        | -0.44                                     | 3.54E-05       |

**Supplementary Table 10** List of Two-Wise miRNA Combinations that Showed Significant GI (Q-value < 0.03) in Modifying Docetaxel Resistance in OVCAR8-ADR Cells Based on Pooled Screening

| <b>miR-A</b>                          | <b>miR-B</b>                          | <b>Q-value</b> |
|---------------------------------------|---------------------------------------|----------------|
| <i>miR-29b</i>                        | <i>miR-376a</i>                       | 2.50E-13       |
| <i>miR-16-1/15a</i> cluster           | <i>miR-29b</i>                        | 2.76E-11       |
| <i>miR-188</i>                        | <i>miR-212</i>                        | 1.07E-05       |
| <i>miR-93/106b</i> cluster            | <i>miR-24-2/27a/23a</i> cluster       | 1.31E-05       |
| <i>let-7c</i>                         | <i>let-7c</i>                         | 3.57E-05       |
| <i>miR-93/106b</i> cluster            | <i>miR-429</i>                        | 1.03E-04       |
| <i>miR-212</i>                        | <i>miR-376a</i>                       | 1.22E-04       |
| <i>miR-34a</i>                        | <i>miR-34a</i>                        | 3.25E-04       |
| <i>miR-16-1/15a</i> cluster           | <i>miR-488</i>                        | 4.29E-04       |
| <i>miR-181c</i>                       | <i>miR-216</i>                        | 6.29E-04       |
| <i>miR-16-1/15a</i> cluster           | <i>miR-376a</i>                       | 1.45E-03       |
| <i>miR-29b</i>                        | <i>miR-10b</i>                        | 1.45E-03       |
| <i>miR-376a</i>                       | <i>let-7i</i>                         | 1.45E-03       |
| <i>let-7b/miR-4763</i> cluster        | <i>miR-29b</i>                        | 3.29E-03       |
| <i>miR-181a</i>                       | <i>miR-31</i>                         | 3.29E-03       |
| <i>miR-376a</i>                       | <i>miR-31</i>                         | 3.29E-03       |
| <i>miR-429</i>                        | <i>miR-429</i>                        | 3.37E-03       |
| <i>miR-16-1/15a</i> cluster           | <i>miR-93/106b</i> cluster            | 3.56E-03       |
| <i>miR-93/106b</i> cluster            | <i>miR-181a</i>                       | 3.98E-03       |
| <i>miR-29b</i>                        | <i>miR-29b</i>                        | 5.68E-03       |
| <i>let-7c</i>                         | <i>miR-376a</i>                       | 7.53E-03       |
| <i>miR-181a</i>                       | <i>let-7i</i>                         | 1.28E-02       |
| <i>miR-34a</i>                        | <i>miR-126</i>                        | 1.63E-02       |
| <i>miR-451a/451b/144/4732</i> cluster | <i>miR-451a/451b/144/4732</i> cluster | 1.85E-02       |
| <i>let-7i</i>                         | <i>let-7i</i>                         | 2.32E-02       |
| <i>miR-29b</i>                        | <i>miR-216</i>                        | 2.45E-02       |
| <i>miR-93/106b</i> cluster            | <i>miR-199b/3154</i> cluster          | 2.67E-02       |
| <i>miR-16-1/15a</i> cluster           | <i>miR-451a/451b/144/4732</i> cluster | 2.85E-02       |
| <i>miR-324</i>                        | <i>miR-216</i>                        | 2.85E-02       |

**Supplementary Table 11** List of miRNAs (*miR-C*) that Showed Significant GI (Q-value < 0.002) with Two-Wise miRNA Combinations (*miR-A* + *miR-B*) in Modifying Docetaxel Resistance in OVCAR8-ADR Cells Based on Pooled Screening

| <i>miR-A</i>                    | <i>miR-B</i>                          | <i>miR-C</i>                          | Q-value  |
|---------------------------------|---------------------------------------|---------------------------------------|----------|
| <i>miR-34a</i>                  | <i>miR-31</i>                         | <i>miR-376a</i>                       | 9.75E-22 |
| <i>miR-376a</i>                 | <i>miR-31</i>                         | <i>miR-34a</i>                        | 8.11E-21 |
| <i>miR-34a</i>                  | <i>miR-376a</i>                       | <i>miR-31</i>                         | 1.15E-18 |
| <i>miR-29a</i>                  | <i>miR-199b/3154</i> cluster          | <i>let-7c</i>                         | 1.07E-15 |
| <i>let-7c</i>                   | <i>miR-29a</i>                        | <i>miR-199b/3154</i> cluster          | 2.02E-14 |
| <i>let-7c</i>                   | <i>miR-199b/3154</i> cluster          | <i>miR-29a</i>                        | 1.66E-13 |
| <i>miR-128b</i>                 | <i>miR-181c</i>                       | <i>miR-188</i>                        | 2.98E-13 |
| <i>miR-181c</i>                 | <i>miR-31</i>                         | <i>miR-212</i>                        | 3.77E-13 |
| <i>miR-132</i>                  | <i>miR-132</i>                        | <i>miR-31</i>                         | 7.58E-13 |
| <i>miR-196</i>                  | <i>miR-10b</i>                        | <i>miR-196</i>                        | 1.50E-12 |
| <i>miR-196</i>                  | <i>miR-196</i>                        | <i>miR-10b</i>                        | 1.73E-12 |
| <i>miR-24-2/27a/23a</i> cluster | <i>miR-24-2/27a/23a</i> cluster       | <i>miR-181c</i>                       | 2.33E-12 |
| <i>miR-16-1/15a</i> cluster     | <i>miR-29a</i>                        | <i>miR-181c</i>                       | 6.13E-12 |
| <i>miR-128b</i>                 | <i>miR-188</i>                        | <i>miR-181c</i>                       | 7.89E-12 |
| <i>miR-181c</i>                 | <i>miR-212</i>                        | <i>miR-31</i>                         | 7.89E-12 |
| <i>miR-31</i>                   | <i>miR-31</i>                         | <i>miR-373</i>                        | 7.89E-12 |
| <i>miR-181c</i>                 | <i>miR-188</i>                        | <i>miR-128b</i>                       | 8.33E-12 |
| <i>miR-16-1/15a</i> cluster     | <i>miR-181c</i>                       | <i>miR-29a</i>                        | 8.84E-12 |
| <i>miR-181c</i>                 | <i>miR-376a</i>                       | <i>miR-129-2</i>                      | 9.42E-12 |
| <i>miR-129-2</i>                | <i>miR-181c</i>                       | <i>miR-324</i>                        | 1.07E-11 |
| <i>miR-129-2</i>                | <i>miR-181c</i>                       | <i>miR-376a</i>                       | 1.09E-11 |
| <i>miR-129-2</i>                | <i>miR-324</i>                        | <i>miR-181c</i>                       | 1.51E-11 |
| <i>miR-132</i>                  | <i>miR-31</i>                         | <i>miR-132</i>                        | 1.51E-11 |
| <i>miR-429</i>                  | <i>miR-451a/451b/144/4732</i> cluster | <i>miR-132</i>                        | 2.34E-11 |
| <i>miR-212</i>                  | <i>miR-31</i>                         | <i>miR-181c</i>                       | 3.42E-11 |
| <i>miR-129-2</i>                | <i>miR-376a</i>                       | <i>miR-181c</i>                       | 7.68E-11 |
| <i>miR-181c</i>                 | <i>miR-10b</i>                        | <i>miR-211</i>                        | 1.08E-10 |
| <i>miR-181a</i>                 | <i>miR-181c</i>                       | <i>miR-199b/3154</i> cluster          | 1.12E-10 |
| <i>let-7i</i>                   | <i>let-7i</i>                         | <i>let-7d</i>                         | 1.12E-10 |
| <i>miR-126</i>                  | <i>miR-10b</i>                        | <i>miR-10b</i>                        | 1.12E-10 |
| <i>miR-31</i>                   | <i>miR-373</i>                        | <i>miR-31</i>                         | 1.25E-10 |
| <i>miR-128b</i>                 | <i>miR-128b</i>                       | <i>let-7i</i>                         | 2.15E-10 |
| <i>miR-132</i>                  | <i>miR-451a/451b/144/4732</i> cluster | <i>miR-429</i>                        | 3.60E-10 |
| <i>miR-29a</i>                  | <i>miR-181c</i>                       | <i>miR-16-1/15a</i> cluster           | 4.20E-10 |
| <i>let-7i</i>                   | <i>miR-196</i>                        | <i>let-7i</i>                         | 4.20E-10 |
| <i>miR-181c</i>                 | <i>miR-24-2/27a/23a</i> cluster       | <i>miR-24-2/27a/23a</i> cluster       | 4.83E-10 |
| <i>miR-328</i>                  | <i>miR-451a/451b/144/4732</i> cluster | <i>let-7e/miR-99b</i> cluster         | 5.63E-10 |
| <i>miR-34a</i>                  | <i>miR-31</i>                         | <i>miR-29a</i>                        | 1.21E-09 |
| <i>miR-29a</i>                  | <i>miR-199b/3154</i> cluster          | <i>let-7i</i>                         | 1.64E-09 |
| <i>miR-128b</i>                 | <i>miR-126</i>                        | <i>miR-128b</i>                       | 1.67E-09 |
| <i>miR-16-1/15a</i> cluster     | <i>let-7e/miR-99b</i> cluster         | <i>miR-429</i>                        | 1.77E-09 |
| <i>miR-10b</i>                  | <i>miR-10b</i>                        | <i>miR-126</i>                        | 2.04E-09 |
| <i>miR-181c</i>                 | <i>miR-324</i>                        | <i>miR-129-2</i>                      | 2.09E-09 |
| <i>miR-29a</i>                  | <i>miR-15b/miR-16-2</i> cluster       | <i>miR-29a</i>                        | 2.61E-09 |
| <i>miR-132</i>                  | <i>miR-429</i>                        | <i>miR-451a/451b/144/4732</i> cluster | 3.31E-09 |
| <i>let-7d</i>                   | <i>let-7i</i>                         | <i>let-7i</i>                         | 3.46E-09 |
| <i>miR-29a</i>                  | <i>let-7i</i>                         | <i>miR-199b/3154</i> cluster          | 3.92E-09 |

|                                 |                                       |                                       |          |
|---------------------------------|---------------------------------------|---------------------------------------|----------|
| <i>miR-16-1/15a</i> cluster     | <i>miR-429</i>                        | <i>let-7e/miR-99b</i> cluster         | 4.00E-09 |
| <i>miR-128b</i>                 | <i>let-7i</i>                         | <i>miR-128b</i>                       | 4.00E-09 |
| <i>miR-181c</i>                 | <i>miR-211</i>                        | <i>miR-10b</i>                        | 6.26E-09 |
| <i>let-7e/miR-99b</i> cluster   | <i>miR-328</i>                        | <i>miR-451a/451b/144/4732</i> cluster | 6.57E-09 |
| <i>let-7c</i>                   | <i>miR-199b/3154</i> cluster          | <i>let-7c</i>                         | 6.87E-09 |
| <i>miR-16-1/15a</i> cluster     | <i>miR-31</i>                         | <i>miR-10b</i>                        | 7.06E-09 |
| <i>miR-373</i>                  | <i>miR-429</i>                        | <i>miR-181a</i>                       | 7.25E-09 |
| <i>miR-324</i>                  | <i>miR-24-2/27a/23a</i> cluster       | <i>miR-373</i>                        | 9.58E-09 |
| <i>miR-181c</i>                 | <i>miR-376a</i>                       | <i>miR-132</i>                        | 1.18E-08 |
| <i>miR-199b/3154</i> cluster    | <i>miR-199b/3154</i> cluster          | <i>miR-126</i>                        | 1.20E-08 |
| <i>miR-181a</i>                 | <i>miR-451a/451b/144/4732</i> cluster | <i>miR-126</i>                        | 1.21E-08 |
| <i>let-7e/miR-99b</i> cluster   | <i>miR-451a/451b/144/4732</i> cluster | <i>miR-328</i>                        | 1.45E-08 |
| <i>let-7i</i>                   | <i>let-7i</i>                         | <i>miR-196</i>                        | 1.49E-08 |
| <i>let-7c</i>                   | <i>miR-429</i>                        | <i>miR-376a</i>                       | 1.50E-08 |
| <i>miR-128b</i>                 | <i>miR-212</i>                        | <i>miR-128b</i>                       | 1.52E-08 |
| <i>miR-34a</i>                  | <i>miR-34a</i>                        | <i>miR-429</i>                        | 1.80E-08 |
| <i>let-7e/miR-99b</i> cluster   | <i>miR-429</i>                        | <i>miR-16-1/15a</i> cluster           | 1.84E-08 |
| <i>miR-211</i>                  | <i>miR-10b</i>                        | <i>miR-181c</i>                       | 1.91E-08 |
| <i>miR-181a</i>                 | <i>miR-199b/3154</i> cluster          | <i>miR-181c</i>                       | 1.93E-08 |
| <i>miR-324</i>                  | <i>miR-373</i>                        | <i>miR-24-2/27a/23a</i> cluster       | 2.33E-08 |
| <i>miR-181a</i>                 | <i>miR-373</i>                        | <i>miR-429</i>                        | 2.37E-08 |
| <i>miR-16-1/15a</i> cluster     | <i>miR-10b</i>                        | <i>miR-31</i>                         | 2.48E-08 |
| <i>let-7c</i>                   | <i>let-7c</i>                         | <i>miR-199b/3154</i> cluster          | 2.98E-08 |
| <i>miR-128b</i>                 | <i>miR-24-2/27a/23a</i> cluster       | <i>miR-31</i>                         | 3.01E-08 |
| <i>miR-24-2/27a/23a</i> cluster | <i>miR-373</i>                        | <i>miR-324</i>                        | 3.19E-08 |
| <i>miR-132</i>                  | <i>miR-181c</i>                       | <i>miR-488</i>                        | 3.64E-08 |
| <i>let-7i</i>                   | <i>miR-199b/3154</i> cluster          | <i>miR-29a</i>                        | 4.81E-08 |
| <i>let-7a</i>                   | <i>miR-376a</i>                       | <i>miR-212</i>                        | 5.44E-08 |
| <i>miR-128b</i>                 | <i>miR-181c</i>                       | <i>miR-126</i>                        | 5.58E-08 |
| <i>miR-126</i>                  | <i>miR-451a/451b/144/4732</i> cluster | <i>miR-181a</i>                       | 6.12E-08 |
| <i>let-7a</i>                   | <i>miR-212</i>                        | <i>miR-376a</i>                       | 7.00E-08 |
| <i>miR-128b</i>                 | <i>miR-128b</i>                       | <i>miR-126</i>                        | 7.27E-08 |
| <i>miR-181c</i>                 | <i>miR-199b/3154</i> cluster          | <i>miR-181a</i>                       | 7.27E-08 |
| <i>miR-376a</i>                 | <i>miR-429</i>                        | <i>let-7c</i>                         | 7.47E-08 |
| <i>miR-376a</i>                 | <i>miR-376a</i>                       | <i>miR-29b</i>                        | 9.26E-08 |
| <i>miR-29b</i>                  | <i>miR-376a</i>                       | <i>miR-376a</i>                       | 9.46E-08 |
| <i>miR-376a</i>                 | <i>let-7i</i>                         | <i>miR-34a</i>                        | 9.46E-08 |
| <i>miR-126</i>                  | <i>miR-199b/3154</i> cluster          | <i>miR-199b/3154</i> cluster          | 9.46E-08 |
| <i>miR-128b</i>                 | <i>miR-181a</i>                       | <i>miR-489</i>                        | 9.89E-08 |
| <i>miR-181a</i>                 | <i>miR-429</i>                        | <i>miR-373</i>                        | 9.89E-08 |
| <i>miR-29a</i>                  | <i>miR-34a</i>                        | <i>miR-31</i>                         | 1.06E-07 |
| <i>miR-132</i>                  | <i>miR-376a</i>                       | <i>miR-181c</i>                       | 1.09E-07 |
| <i>miR-181a</i>                 | <i>miR-488</i>                        | <i>miR-29a</i>                        | 1.14E-07 |
| <i>miR-29a</i>                  | <i>let-7e/miR-99b</i> cluster         | <i>miR-31</i>                         | 1.26E-07 |
| <i>miR-16-1/15a</i> cluster     | <i>miR-488</i>                        | <i>miR-16-1/15a</i> cluster           | 1.26E-07 |
| <i>miR-212</i>                  | <i>miR-376a</i>                       | <i>let-7a</i>                         | 1.34E-07 |
| <i>miR-128b</i>                 | <i>miR-126</i>                        | <i>miR-181c</i>                       | 1.50E-07 |
| <i>miR-29a</i>                  | <i>miR-31</i>                         | <i>miR-34a</i>                        | 1.62E-07 |
| <i>miR-9-1</i>                  | <i>miR-181c</i>                       | <i>miR-324</i>                        | 1.73E-07 |
| <i>miR-128b</i>                 | <i>miR-15b/miR-16-2</i> cluster       | <i>miR-34a</i>                        | 2.47E-07 |
| <i>miR-181c</i>                 | <i>miR-324</i>                        | <i>miR-9-1</i>                        | 2.66E-07 |
| <i>miR-128b</i>                 | <i>miR-31</i>                         | <i>miR-24-2/27a/23a</i> cluster       | 2.77E-07 |
| <i>miR-181c</i>                 | <i>miR-126</i>                        | <i>miR-128b</i>                       | 3.09E-07 |

|                                       |                                       |                                       |          |
|---------------------------------------|---------------------------------------|---------------------------------------|----------|
| <i>miR-181c</i>                       | <i>miR-488</i>                        | <i>miR-132</i>                        | 3.31E-07 |
| <i>miR-16-1/15a</i> cluster           | <i>miR-451a/451b/144/4732</i> cluster | <i>miR-16-1/15a</i> cluster           | 3.53E-07 |
| <i>miR-132</i>                        | <i>miR-181c</i>                       | <i>miR-376a</i>                       | 3.53E-07 |
| <i>miR-15b/miR-16-2</i> cluster       | <i>miR-451a/451b/144/4732</i> cluster | <i>miR-188</i>                        | 3.62E-07 |
| <i>miR-128b</i>                       | <i>miR-489</i>                        | <i>miR-181a</i>                       | 4.98E-07 |
| <i>miR-324</i>                        | <i>miR-199b/3154</i> cluster          | <i>miR-10b</i>                        | 5.13E-07 |
| <i>miR-376a</i>                       | <i>miR-328</i>                        | <i>miR-29b</i>                        | 5.13E-07 |
| <i>miR-324</i>                        | <i>miR-376a</i>                       | <i>let-7a</i>                         | 6.14E-07 |
| <i>miR-324</i>                        | <i>miR-10b</i>                        | <i>miR-199b/3154</i> cluster          | 6.71E-07 |
| <i>miR-188</i>                        | <i>miR-376a</i>                       | <i>let-7e/miR-99b</i> cluster         | 8.20E-07 |
| <i>miR-451a/451b/144/4732</i> cluster | <i>miR-451a/451b/144/4732</i> cluster | <i>miR-34a</i>                        | 8.20E-07 |
| <i>miR-128b</i>                       | <i>miR-199b/3154</i> cluster          | <i>miR-128b</i>                       | 8.20E-07 |
| <i>miR-188</i>                        | <i>miR-451a/451b/144/4732</i> cluster | <i>miR-15b/miR-16-2</i> cluster       | 8.70E-07 |
| <i>miR-181c</i>                       | <i>miR-181c</i>                       | <i>let-7c</i>                         | 9.30E-07 |
| <i>miR-181a</i>                       | <i>miR-489</i>                        | <i>miR-216</i>                        | 9.72E-07 |
| <i>miR-324</i>                        | <i>miR-199b/3154</i> cluster          | <i>miR-324</i>                        | 9.72E-07 |
| <i>miR-29a</i>                        | <i>miR-29a</i>                        | <i>miR-15b/miR-16-2</i> cluster       | 9.76E-07 |
| <i>let-7c</i>                         | <i>miR-128b</i>                       | <i>let-7c</i>                         | 1.09E-06 |
| <i>miR-24-2/27a/23a</i> cluster       | <i>miR-31</i>                         | <i>miR-128b</i>                       | 1.45E-06 |
| <i>miR-211</i>                        | <i>miR-211</i>                        | <i>miR-376a</i>                       | 1.56E-06 |
| <i>miR-29a</i>                        | <i>miR-31</i>                         | <i>let-7e/miR-99b</i> cluster         | 1.70E-06 |
| <i>miR-181c</i>                       | <i>miR-324</i>                        | <i>miR-212</i>                        | 1.79E-06 |
| <i>let-7d</i>                         | <i>miR-10b</i>                        | <i>miR-10b</i>                        | 1.95E-06 |
| <i>let-7e/miR-99b</i> cluster         | <i>let-7e/miR-99b</i> cluster         | <i>miR-132</i>                        | 1.95E-06 |
| <i>miR-128b</i>                       | <i>miR-324</i>                        | <i>miR-188</i>                        | 1.97E-06 |
| <i>miR-181a</i>                       | <i>miR-126</i>                        | <i>miR-451a/451b/144/4732</i> cluster | 2.00E-06 |
| <i>let-7e/miR-99b</i> cluster         | <i>miR-31</i>                         | <i>miR-29a</i>                        | 2.03E-06 |
| <i>miR-212</i>                        | <i>miR-376a</i>                       | <i>miR-181c</i>                       | 2.06E-06 |
| <i>miR-29b</i>                        | <i>miR-489</i>                        | <i>miR-181c</i>                       | 2.27E-06 |
| <i>let-7a</i>                         | <i>miR-324</i>                        | <i>let-7a</i>                         | 2.31E-06 |
| <i>miR-29a</i>                        | <i>miR-489</i>                        | <i>miR-489</i>                        | 2.35E-06 |
| <i>let-7a</i>                         | <i>miR-376a</i>                       | <i>miR-324</i>                        | 2.40E-06 |
| <i>miR-128b</i>                       | <i>miR-128b</i>                       | <i>miR-29a</i>                        | 2.68E-06 |
| <i>miR-489</i>                        | <i>miR-489</i>                        | <i>miR-29a</i>                        | 2.79E-06 |
| <i>miR-128b</i>                       | <i>miR-188</i>                        | <i>miR-324</i>                        | 2.85E-06 |
| <i>miR-188</i>                        | <i>miR-15b/miR-16-2</i> cluster       | <i>miR-451a/451b/144/4732</i> cluster | 3.10E-06 |
| <i>let-7c</i>                         | <i>miR-376a</i>                       | <i>miR-451a/451b/144/4732</i> cluster | 3.25E-06 |
| <i>let-7c</i>                         | <i>let-7c</i>                         | <i>miR-429</i>                        | 3.46E-06 |
| <i>miR-34a</i>                        | <i>miR-15b/miR-16-2</i> cluster       | <i>miR-128b</i>                       | 3.46E-06 |
| <i>miR-132</i>                        | <i>miR-488</i>                        | <i>miR-181c</i>                       | 3.48E-06 |
| <i>miR-212</i>                        | <i>miR-199b/3154</i> cluster          | <i>miR-181a</i>                       | 3.60E-06 |
| <i>miR-9-1</i>                        | <i>miR-324</i>                        | <i>miR-181c</i>                       | 3.72E-06 |
| <i>miR-199b/3154</i> cluster          | <i>miR-10b</i>                        | <i>miR-324</i>                        | 3.75E-06 |
| <i>miR-128b</i>                       | <i>miR-128b</i>                       | <i>miR-212</i>                        | 4.07E-06 |
| <i>miR-29b</i>                        | <i>miR-181c</i>                       | <i>miR-489</i>                        | 4.45E-06 |
| <i>let-7e/miR-99b</i> cluster         | <i>miR-188</i>                        | <i>miR-376a</i>                       | 4.51E-06 |
| <i>miR-24-2/27a/23a</i> cluster       | <i>miR-24-2/27a/23a</i> cluster       | <i>miR-188</i>                        | 4.53E-06 |
| <i>miR-181c</i>                       | <i>miR-212</i>                        | <i>miR-376a</i>                       | 4.64E-06 |
| <i>let-7c</i>                         | <i>miR-376a</i>                       | <i>miR-429</i>                        | 4.86E-06 |
| <i>miR-181c</i>                       | <i>miR-376a</i>                       | <i>miR-212</i>                        | 4.86E-06 |



|                                 |                                       |                                          |          |
|---------------------------------|---------------------------------------|------------------------------------------|----------|
| <i>miR-488</i>                  | <i>miR-429</i>                        | <i>miR-429</i>                           | 5.25E-06 |
| <i>miR-181a</i>                 | <i>miR-489</i>                        | <i>miR-128b</i>                          | 5.37E-06 |
| <i>miR-376a</i>                 | <i>miR-216</i>                        | <i>miR-451a/451b/144/4732</i><br>cluster | 5.37E-06 |
| <i>miR-29b</i>                  | <i>miR-328</i>                        | <i>miR-376a</i>                          | 5.45E-06 |
| <i>miR-181a</i>                 | <i>miR-376a</i>                       | <i>let-7c</i>                            | 5.93E-06 |
| <i>let-7c</i>                   | <i>let-7c</i>                         | <i>miR-128b</i>                          | 6.07E-06 |
| <i>let-7i</i>                   | <i>miR-15b/miR-16-2</i> cluster       | <i>miR-10b</i>                           | 6.20E-06 |
| <i>miR-93/106b</i> cluster      | <i>miR-181c</i>                       | <i>miR-93/106b</i> cluster               | 6.97E-06 |
| <i>miR-376a</i>                 | <i>miR-451a/451b/144/4732</i> cluster | <i>miR-9-1</i>                           | 7.10E-06 |
| <i>let-7a</i>                   | <i>let-7a</i>                         | <i>miR-324</i>                           | 8.20E-06 |
| <i>miR-132</i>                  | <i>miR-31</i>                         | <i>miR-128b</i>                          | 8.20E-06 |
| <i>miR-34a</i>                  | <i>miR-128b</i>                       | <i>miR-15b/miR-16-2</i> cluster          | 8.44E-06 |
| <i>miR-376a</i>                 | <i>miR-328</i>                        | <i>miR-24-2/27a/23a</i> cluster          | 8.70E-06 |
| <i>miR-93/106b</i> cluster      | <i>miR-181c</i>                       | <i>miR-34a</i>                           | 8.71E-06 |
| <i>let-7i</i>                   | <i>miR-328</i>                        | <i>miR-328</i>                           | 9.18E-06 |
| <i>miR-181a</i>                 | <i>miR-212</i>                        | <i>miR-199b/3154</i> cluster             | 9.32E-06 |
| <i>miR-29a</i>                  | <i>miR-211</i>                        | <i>miR-126</i>                           | 9.65E-06 |
| <i>miR-376a</i>                 | <i>miR-211</i>                        | <i>let-7c</i>                            | 9.65E-06 |
| <i>miR-16-1/15a</i> cluster     | <i>miR-16-1/15a</i> cluster           | <i>miR-132</i>                           | 9.79E-06 |
| <i>let-7a</i>                   | <i>miR-324</i>                        | <i>miR-376a</i>                          | 9.79E-06 |
| <i>let-7c</i>                   | <i>miR-211</i>                        | <i>miR-376a</i>                          | 1.01E-05 |
| <i>miR-429</i>                  | <i>miR-429</i>                        | <i>miR-488</i>                           | 1.01E-05 |
| <i>let-7d</i>                   | <i>miR-10b</i>                        | <i>let-7i</i>                            | 1.10E-05 |
| <i>let-7a</i>                   | <i>miR-199b/3154</i> cluster          | <i>miR-16-1/15a</i> cluster              | 1.15E-05 |
| <i>miR-29b</i>                  | <i>miR-376a</i>                       | <i>miR-328</i>                           | 1.15E-05 |
| <i>miR-376a</i>                 | <i>miR-451a/451b/144/4732</i> cluster | <i>let-7c</i>                            | 1.15E-05 |
| <i>miR-31</i>                   | <i>miR-10b</i>                        | <i>miR-16-1/15a</i> cluster              | 1.15E-05 |
| <i>miR-24-2/27a/23a</i> cluster | <i>miR-24-2/27a/23a</i> cluster       | <i>miR-708</i>                           | 1.17E-05 |
| <i>miR-24-2/27a/23a</i> cluster | <i>miR-328</i>                        | <i>miR-376a</i>                          | 1.17E-05 |
| <i>let-7e/miR-99b</i> cluster   | <i>miR-376a</i>                       | <i>miR-188</i>                           | 1.19E-05 |
| <i>miR-188</i>                  | <i>miR-24-2/27a/23a</i> cluster       | <i>miR-24-2/27a/23a</i> cluster          | 1.19E-05 |
| <i>miR-132</i>                  | <i>miR-211</i>                        | <i>miR-376a</i>                          | 1.30E-05 |
| <i>miR-10b</i>                  | <i>miR-10b</i>                        | <i>let-7d</i>                            | 1.42E-05 |
| <i>miR-132</i>                  | <i>miR-181c</i>                       | <i>miR-211</i>                           | 1.43E-05 |
| <i>miR-211</i>                  | <i>miR-451a/451b/144/4732</i> cluster | <i>miR-132</i>                           | 1.51E-05 |
| <i>miR-34a</i>                  | <i>miR-376a</i>                       | <i>let-7i</i>                            | 1.52E-05 |
| <i>miR-16-1/15a</i> cluster     | <i>miR-376a</i>                       | <i>miR-31</i>                            | 1.56E-05 |
| <i>miR-181c</i>                 | <i>miR-489</i>                        | <i>miR-29b</i>                           | 1.66E-05 |
| <i>miR-181a</i>                 | <i>miR-376a</i>                       | <i>miR-373</i>                           | 1.71E-05 |
| <i>miR-216</i>                  | <i>miR-451a/451b/144/4732</i> cluster | <i>miR-376a</i>                          | 1.78E-05 |
| <i>let-7e/miR-99b</i> cluster   | <i>miR-181c</i>                       | <i>miR-488</i>                           | 1.82E-05 |
| <i>miR-216</i>                  | <i>miR-489</i>                        | <i>miR-181a</i>                          | 1.84E-05 |
| <i>let-7d</i>                   | <i>let-7i</i>                         | <i>miR-10b</i>                           | 1.93E-05 |
| <i>miR-128b</i>                 | <i>miR-10b</i>                        | <i>let-7c</i>                            | 2.05E-05 |
| <i>miR-376a</i>                 | <i>miR-24-2/27a/23a</i> cluster       | <i>miR-328</i>                           | 2.11E-05 |
| <i>miR-24-2/27a/23a</i> cluster | <i>miR-373</i>                        | <i>miR-451a/451b/144/4732</i><br>cluster | 2.19E-05 |
| <i>miR-34a</i>                  | <i>miR-451a/451b/144/4732</i> cluster | <i>miR-451a/451b/144/4732</i><br>cluster | 2.42E-05 |
| <i>miR-181c</i>                 | <i>miR-126</i>                        | <i>miR-126</i>                           | 2.43E-05 |
| <i>miR-93/106b</i> cluster      | <i>miR-93/106b</i> cluster            | <i>miR-181c</i>                          | 2.51E-05 |
| <i>miR-29a</i>                  | <i>miR-488</i>                        | <i>miR-181a</i>                          | 2.53E-05 |
| <i>miR-212</i>                  | <i>miR-199b/3154</i> cluster          | <i>miR-29a</i>                           | 2.56E-05 |



|                                       |                                       |                                       |          |
|---------------------------------------|---------------------------------------|---------------------------------------|----------|
| <i>miR-181a</i>                       | <i>miR-199b/3154</i> cluster          | <i>miR-212</i>                        | 2.59E-05 |
| <i>miR-373</i>                        | <i>miR-451a/451b/144/4732</i> cluster | <i>miR-24-2/27a/23a</i> cluster       | 2.59E-05 |
| <i>miR-128b</i>                       | <i>miR-373</i>                        | <i>miR-324</i>                        | 2.59E-05 |
| <i>miR-9-1</i>                        | <i>miR-181c</i>                       | <i>miR-489</i>                        | 2.63E-05 |
| <i>miR-16-1/15a</i> cluster           | <i>miR-15b/miR-16-2</i> cluster       | <i>miR-429</i>                        | 2.64E-05 |
| <i>miR-376a</i>                       | <i>miR-211</i>                        | <i>miR-211</i>                        | 2.86E-05 |
| <i>miR-9-1</i>                        | <i>miR-376a</i>                       | <i>miR-451a/451b/144/4732</i> cluster | 2.90E-05 |
| <i>miR-181a</i>                       | <i>miR-31</i>                         | <i>let-7b/miR-4763</i> cluster        | 3.08E-05 |
| <i>miR-376a</i>                       | <i>miR-451a/451b/144/4732</i> cluster | <i>miR-216</i>                        | 3.08E-05 |
| <i>miR-9-1</i>                        | <i>miR-128b</i>                       | <i>miR-128b</i>                       | 3.17E-05 |
| <i>miR-29c</i>                        | <i>miR-376a</i>                       | <i>miR-181a</i>                       | 3.17E-05 |
| <i>let-7e/miR-99b</i> cluster         | <i>miR-376a</i>                       | <i>miR-199b/3154</i> cluster          | 3.17E-05 |
| <i>miR-181c</i>                       | <i>miR-373</i>                        | <i>miR-199b/3154</i> cluster          | 3.17E-05 |
| <i>miR-29b</i>                        | <i>miR-29b</i>                        | <i>miR-376a</i>                       | 3.18E-05 |
| <i>miR-376a</i>                       | <i>miR-211</i>                        | <i>miR-132</i>                        | 3.18E-05 |
| <i>let-7a</i>                         | <i>miR-16-1/15a</i> cluster           | <i>miR-199b/3154</i> cluster          | 3.21E-05 |
| <i>miR-488</i>                        | <i>miR-31</i>                         | <i>miR-376a</i>                       | 3.26E-05 |
| <i>miR-31</i>                         | <i>miR-373</i>                        | <i>miR-451a/451b/144/4732</i> cluster | 3.26E-05 |
| <i>let-7i</i>                         | <i>miR-196</i>                        | <i>miR-128b</i>                       | 3.32E-05 |
| <i>let-7e/miR-99b</i> cluster         | <i>miR-132</i>                        | <i>let-7e/miR-99b</i> cluster         | 3.33E-05 |
| <i>miR-128b</i>                       | <i>miR-196</i>                        | <i>let-7i</i>                         | 3.39E-05 |
| <i>let-7i</i>                         | <i>miR-10b</i>                        | <i>let-7d</i>                         | 3.51E-05 |
| <i>miR-126</i>                        | <i>miR-211</i>                        | <i>miR-29a</i>                        | 3.56E-05 |
| <i>miR-181c</i>                       | <i>miR-24-2/27a/23a</i> cluster       | <i>miR-29b</i>                        | 3.59E-05 |
| <i>miR-188</i>                        | <i>miR-324</i>                        | <i>miR-128b</i>                       | 3.63E-05 |
| <i>miR-128b</i>                       | <i>miR-328</i>                        | <i>miR-128b</i>                       | 4.01E-05 |
| <i>miR-128b</i>                       | <i>miR-31</i>                         | <i>miR-132</i>                        | 4.25E-05 |
| <i>miR-376a</i>                       | <i>miR-31</i>                         | <i>miR-488</i>                        | 4.46E-05 |
| <i>miR-29a</i>                        | <i>miR-126</i>                        | <i>miR-211</i>                        | 4.50E-05 |
| <i>miR-181a</i>                       | <i>miR-216</i>                        | <i>miR-489</i>                        | 4.50E-05 |
| <i>miR-181a</i>                       | <i>miR-24-2/27a/23a</i> cluster       | <i>miR-376a</i>                       | 4.55E-05 |
| <i>let-7d</i>                         | <i>miR-10b</i>                        | <i>miR-181c</i>                       | 4.56E-05 |
| <i>miR-29a</i>                        | <i>miR-181a</i>                       | <i>miR-488</i>                        | 4.57E-05 |
| <i>miR-126</i>                        | <i>miR-126</i>                        | <i>miR-181c</i>                       | 4.57E-05 |
| <i>let-7c</i>                         | <i>miR-10b</i>                        | <i>miR-128b</i>                       | 4.82E-05 |
| <i>miR-376a</i>                       | <i>miR-488</i>                        | <i>miR-31</i>                         | 4.84E-05 |
| <i>let-7c</i>                         | <i>miR-429</i>                        | <i>let-7c</i>                         | 5.02E-05 |
| <i>miR-181a</i>                       | <i>miR-708</i>                        | <i>miR-324</i>                        | 5.02E-05 |
| <i>miR-451a/451b/144/4732</i> cluster | <i>miR-451a/451b/144/4732</i> cluster | <i>miR-328</i>                        | 5.03E-05 |
| <i>let-7d</i>                         | <i>miR-181c</i>                       | <i>miR-10b</i>                        | 5.07E-05 |
| <i>miR-373</i>                        | <i>miR-451a/451b/144/4732</i> cluster | <i>miR-31</i>                         | 5.17E-05 |
| <i>miR-181a</i>                       | <i>let-7i</i>                         | <i>miR-216</i>                        | 5.28E-05 |
| <i>miR-708</i>                        | <i>miR-24-2/27a/23a</i> cluster       | <i>miR-24-2/27a/23a</i> cluster       | 5.28E-05 |
| <i>miR-451a/451b/144/4732</i> cluster | <i>miR-451a/451b/144/4732</i> cluster | <i>miR-708</i>                        | 5.53E-05 |
| <i>miR-181c</i>                       | <i>miR-211</i>                        | <i>miR-132</i>                        | 5.61E-05 |
| <i>miR-181c</i>                       | <i>miR-31</i>                         | <i>miR-129-2</i>                      | 5.68E-05 |
| <i>let-7a</i>                         | <i>let-7i</i>                         | <i>let-7i</i>                         | 5.79E-05 |
| <i>miR-181a</i>                       | <i>miR-451a/451b/144/4732</i> cluster | <i>miR-451a/451b/144/4732</i> cluster | 5.79E-05 |
| <i>miR-216</i>                        | <i>miR-216</i>                        | <i>miR-216</i>                        | 5.86E-05 |

|                                 |                                       |                                       |          |
|---------------------------------|---------------------------------------|---------------------------------------|----------|
| <i>miR-16-1/15a</i> cluster     | <i>miR-451a/451b/144/4732</i> cluster | <i>miR-29b</i>                        | 5.94E-05 |
| <i>let-7e/miR-99b</i> cluster   | <i>miR-199b/3154</i> cluster          | <i>miR-376a</i>                       | 5.96E-05 |
| <i>miR-128b</i>                 | <i>miR-15b/miR-16-2</i> cluster       | <i>miR-10b</i>                        | 6.50E-05 |
| <i>miR-24-2/27a/23a</i> cluster | <i>miR-451a/451b/144/4732</i> cluster | <i>miR-373</i>                        | 6.50E-05 |
| <i>miR-181c</i>                 | <i>miR-212</i>                        | <i>miR-324</i>                        | 6.66E-05 |
| <i>miR-15b/miR-16-2</i> cluster | <i>miR-10b</i>                        | <i>let-7i</i>                         | 6.78E-05 |
| <i>miR-324</i>                  | <i>miR-10b</i>                        | <i>miR-196</i>                        | 7.24E-05 |
| <i>miR-212</i>                  | <i>miR-10b</i>                        | <i>miR-132</i>                        | 7.41E-05 |
| <i>miR-16-1/15a</i> cluster     | <i>miR-199b/3154</i> cluster          | <i>let-7a</i>                         | 7.72E-05 |
| <i>miR-128b</i>                 | <i>let-7i</i>                         | <i>miR-196</i>                        | 7.72E-05 |
| <i>miR-128b</i>                 | <i>miR-24-2/27a/23a</i> cluster       | <i>miR-128b</i>                       | 7.72E-05 |
| <i>miR-708</i>                  | <i>miR-451a/451b/144/4732</i> cluster | <i>miR-451a/451b/144/4732</i> cluster | 7.72E-05 |
| <i>miR-16-1/15a</i> cluster     | <i>miR-181a</i>                       | <i>miR-212</i>                        | 7.87E-05 |
| <i>miR-128b</i>                 | <i>miR-128b</i>                       | <i>miR-199b/3154</i> cluster          | 7.96E-05 |
| <i>miR-9-1</i>                  | <i>miR-29a</i>                        | <i>miR-181c</i>                       | 7.99E-05 |
| <i>miR-132</i>                  | <i>miR-451a/451b/144/4732</i> cluster | <i>miR-211</i>                        | 7.99E-05 |
| <i>let-7i</i>                   | <i>miR-10b</i>                        | <i>miR-15b/miR-16-2</i> cluster       | 8.08E-05 |
| <i>miR-34a</i>                  | <i>miR-376a</i>                       | <i>miR-328</i>                        | 8.98E-05 |
| <i>miR-24-2/27a/23a</i> cluster | <i>miR-24-2/27a/23a</i> cluster       | <i>miR-34a</i>                        | 9.70E-05 |
| <i>miR-324</i>                  | <i>miR-708</i>                        | <i>miR-181a</i>                       | 9.72E-05 |
| <i>miR-324</i>                  | <i>miR-196</i>                        | <i>miR-10b</i>                        | 9.72E-05 |
| <i>miR-128b</i>                 | <i>miR-324</i>                        | <i>miR-216</i>                        | 9.87E-05 |
| <i>miR-212</i>                  | <i>miR-212</i>                        | <i>miR-181c</i>                       | 1.02E-04 |
| <i>miR-9-1</i>                  | <i>miR-376a</i>                       | <i>miR-376a</i>                       | 1.14E-04 |
| <i>let-7c</i>                   | <i>miR-451a/451b/144/4732</i> cluster | <i>miR-29a</i>                        | 1.17E-04 |
| <i>let-7c</i>                   | <i>miR-128b</i>                       | <i>miR-10b</i>                        | 1.19E-04 |
| <i>miR-9-1</i>                  | <i>miR-451a/451b/144/4732</i> cluster | <i>miR-376a</i>                       | 1.31E-04 |
| <i>miR-128b</i>                 | <i>miR-128b</i>                       | <i>miR-211</i>                        | 1.33E-04 |
| <i>miR-181a</i>                 | <i>miR-212</i>                        | <i>miR-16-1/15a</i> cluster           | 1.35E-04 |
| <i>miR-29b</i>                  | <i>miR-199b/3154</i> cluster          | <i>let-7e/miR-99b</i> cluster         | 1.35E-04 |
| <i>miR-132</i>                  | <i>miR-376a</i>                       | <i>miR-211</i>                        | 1.50E-04 |
| <i>miR-376a</i>                 | <i>miR-488</i>                        | <i>miR-451a/451b/144/4732</i> cluster | 1.53E-04 |
| <i>miR-376a</i>                 | <i>miR-199b/3154</i> cluster          | <i>let-7e/miR-99b</i> cluster         | 1.56E-04 |
| <i>miR-16-1/15a</i> cluster     | <i>miR-216</i>                        | <i>miR-126</i>                        | 1.65E-04 |
| <i>miR-128b</i>                 | <i>miR-132</i>                        | <i>miR-31</i>                         | 1.65E-04 |
| <i>miR-128b</i>                 | <i>miR-132</i>                        | <i>miR-29a</i>                        | 1.67E-04 |
| <i>let-7c</i>                   | <i>miR-376a</i>                       | <i>miR-211</i>                        | 1.68E-04 |
| <i>miR-126</i>                  | <i>miR-216</i>                        | <i>miR-16-1/15a</i> cluster           | 1.73E-04 |
| <i>miR-16-1/15a</i> cluster     | <i>miR-16-1/15a</i> cluster           | <i>miR-488</i>                        | 1.73E-04 |
| <i>miR-128b</i>                 | <i>miR-128b</i>                       | <i>miR-328</i>                        | 1.73E-04 |
| <i>miR-181c</i>                 | <i>miR-10b</i>                        | <i>let-7d</i>                         | 1.74E-04 |
| <i>let-7e/miR-99b</i> cluster   | <i>let-7e/miR-99b</i> cluster         | <i>miR-29b</i>                        | 1.77E-04 |
| <i>miR-181c</i>                 | <i>miR-451a/451b/144/4732</i> cluster | <i>let-7d</i>                         | 1.78E-04 |
| <i>miR-324</i>                  | <i>miR-429</i>                        | <i>miR-324</i>                        | 1.80E-04 |
| <i>let-7e/miR-99b</i> cluster   | <i>miR-429</i>                        | <i>miR-181c</i>                       | 1.85E-04 |
| <i>miR-324</i>                  | <i>miR-31</i>                         | <i>miR-31</i>                         | 1.85E-04 |
| <i>let-7c</i>                   | <i>miR-451a/451b/144/4732</i> cluster | <i>miR-376a</i>                       | 1.91E-04 |
| <i>let-7e/miR-99b</i> cluster   | <i>miR-376a</i>                       | <i>let-7e/miR-99b</i> cluster         | 1.94E-04 |
| <i>miR-15b/miR-16-2</i> cluster | <i>miR-10b</i>                        | <i>miR-128b</i>                       | 1.94E-04 |
| <i>miR-132</i>                  | <i>miR-212</i>                        | <i>miR-10b</i>                        | 1.95E-04 |
| <i>let-7i</i>                   | <i>let-7i</i>                         | <i>let-7a</i>                         | 2.24E-04 |
| <i>miR-132</i>                  | <i>miR-211</i>                        | <i>miR-451a/451b/144/4732</i> cluster | 2.29E-04 |

|                               |                                       |                                       |          |
|-------------------------------|---------------------------------------|---------------------------------------|----------|
|                               |                                       | cluster                               |          |
| <i>let-7c</i>                 | <i>miR-181a</i>                       | <i>miR-376a</i>                       | 2.48E-04 |
| <i>miR-488</i>                | <i>let-7i</i>                         | <i>miR-181a</i>                       | 2.52E-04 |
| <i>miR-188</i>                | <i>miR-188</i>                        | <i>miR-181a</i>                       | 2.59E-04 |
| <i>miR-9-1</i>                | <i>miR-181a</i>                       | <i>miR-429</i>                        | 2.60E-04 |
| <i>miR-16-1/15a</i> cluster   | <i>miR-126</i>                        | <i>miR-216</i>                        | 2.60E-04 |
| <i>let-7i</i>                 | <i>miR-216</i>                        | <i>miR-181a</i>                       | 2.60E-04 |
| <i>miR-196</i>                | <i>miR-10b</i>                        | <i>miR-324</i>                        | 2.60E-04 |
| <i>miR-376a</i>               | <i>miR-373</i>                        | <i>miR-128b</i>                       | 2.71E-04 |
| <i>miR-376a</i>               | <i>miR-24-2/27a/23a</i> cluster       | <i>miR-181a</i>                       | 2.79E-04 |
| <i>miR-196</i>                | <i>miR-451a/451b/144/4732</i> cluster | <i>miR-181c</i>                       | 2.80E-04 |
| <i>miR-128b</i>               | <i>miR-10b</i>                        | <i>miR-15b/miR-16-2</i> cluster       | 2.89E-04 |
| <i>miR-708</i>                | <i>let-7i</i>                         | <i>miR-181a</i>                       | 2.98E-04 |
| <i>miR-16-1/15a</i> cluster   | <i>miR-489</i>                        | <i>miR-451a/451b/144/4732</i> cluster | 2.99E-04 |
| <i>miR-29b</i>                | <i>let-7e/miR-99b</i> cluster         | <i>miR-199b/3154</i> cluster          | 3.02E-04 |
| <i>let-7e/miR-99b</i> cluster | <i>miR-488</i>                        | <i>miR-181c</i>                       | 3.02E-04 |
| <i>miR-16-1/15a</i> cluster   | <i>miR-429</i>                        | <i>miR-15b/miR-16-2</i> cluster       | 3.04E-04 |
| <i>miR-29a</i>                | <i>miR-212</i>                        | <i>miR-199b/3154</i> cluster          | 3.04E-04 |
| <i>miR-128b</i>               | <i>miR-128b</i>                       | <i>miR-24-2/27a/23a</i> cluster       | 3.04E-04 |
| <i>miR-132</i>                | <i>miR-212</i>                        | <i>miR-132</i>                        | 3.04E-04 |
| <i>let-7e/miR-99b</i> cluster | <i>miR-31</i>                         | <i>miR-211</i>                        | 3.20E-04 |
| <i>let-7i</i>                 | <i>miR-429</i>                        | <i>miR-708</i>                        | 3.24E-04 |
| <i>miR-34a</i>                | <i>miR-34a</i>                        | <i>let-7i</i>                         | 3.26E-04 |
| <i>miR-34a</i>                | <i>miR-24-2/27a/23a</i> cluster       | <i>miR-24-2/27a/23a</i> cluster       | 3.32E-04 |
| <i>miR-181a</i>               | <i>miR-324</i>                        | <i>miR-708</i>                        | 3.32E-04 |
| <i>miR-31</i>                 | <i>miR-489</i>                        | <i>miR-10b</i>                        | 3.32E-04 |
| <i>miR-9-1</i>                | <i>miR-34a</i>                        | <i>miR-34a</i>                        | 3.35E-04 |
| <i>miR-34a</i>                | <i>miR-328</i>                        | <i>miR-376a</i>                       | 3.37E-04 |
| <i>miR-376a</i>               | <i>miR-376a</i>                       | <i>miR-9-1</i>                        | 3.41E-04 |
| <i>miR-328</i>                | <i>miR-328</i>                        | <i>let-7i</i>                         | 3.53E-04 |
| <i>miR-324</i>                | <i>miR-373</i>                        | <i>miR-128b</i>                       | 3.54E-04 |
| <i>miR-181c</i>               | <i>miR-15b/miR-16-2</i> cluster       | <i>let-7i</i>                         | 3.59E-04 |
| <i>miR-31</i>                 | <i>miR-31</i>                         | <i>miR-216</i>                        | 3.59E-04 |
| <i>miR-29b</i>                | <i>miR-376a</i>                       | <i>miR-128b</i>                       | 3.61E-04 |
| <i>let-7e/miR-99b</i> cluster | <i>miR-216</i>                        | <i>let-7e/miR-99b</i> cluster         | 3.65E-04 |
| <i>miR-132</i>                | <i>miR-211</i>                        | <i>miR-181c</i>                       | 3.78E-04 |
| <i>miR-181c</i>               | <i>miR-212</i>                        | <i>miR-212</i>                        | 3.78E-04 |
| <i>miR-181c</i>               | <i>miR-708</i>                        | <i>miR-188</i>                        | 3.78E-04 |
| <i>miR-376a</i>               | <i>miR-373</i>                        | <i>miR-24-2/27a/23a</i> cluster       | 3.78E-04 |
| <i>miR-324</i>                | <i>miR-126</i>                        | <i>miR-324</i>                        | 3.80E-04 |
| <i>miR-29c</i>                | <i>miR-31</i>                         | <i>miR-181c</i>                       | 4.07E-04 |
| <i>miR-29a</i>                | <i>miR-128b</i>                       | <i>let-7e/miR-99b</i> cluster         | 4.16E-04 |
| <i>miR-9-1</i>                | <i>miR-429</i>                        | <i>miR-181a</i>                       | 4.23E-04 |
| <i>miR-29c</i>                | <i>miR-181a</i>                       | <i>miR-376a</i>                       | 4.25E-04 |
| <i>miR-132</i>                | <i>miR-181a</i>                       | <i>miR-708</i>                        | 4.25E-04 |
| <i>miR-129-2</i>              | <i>miR-181c</i>                       | <i>miR-31</i>                         | 4.34E-04 |
| <i>miR-99a</i>                | <i>miR-31</i>                         | <i>miR-181c</i>                       | 4.36E-04 |
| <i>miR-181a</i>               | <i>miR-216</i>                        | <i>let-7i</i>                         | 4.39E-04 |
| <i>miR-212</i>                | <i>miR-324</i>                        | <i>miR-181c</i>                       | 4.50E-04 |
| <i>miR-181a</i>               | <i>miR-373</i>                        | <i>miR-376a</i>                       | 4.50E-04 |
| <i>miR-29a</i>                | <i>miR-199b/3154</i> cluster          | <i>miR-212</i>                        | 4.62E-04 |
| <i>miR-31</i>                 | <i>miR-196</i>                        | <i>miR-15b/miR-16-2</i> cluster       | 4.67E-04 |
| <i>miR-181c</i>               | <i>miR-199b/3154</i> cluster          | <i>miR-373</i>                        | 4.69E-04 |

|                                 |                                       |                                       |          |
|---------------------------------|---------------------------------------|---------------------------------------|----------|
| <i>miR-31</i>                   | <i>miR-451a/451b/144/4732</i> cluster | <i>miR-373</i>                        | 4.73E-04 |
| <i>miR-488</i>                  | <i>miR-451a/451b/144/4732</i> cluster | <i>miR-376a</i>                       | 4.82E-04 |
| <i>let-7e/miR-99b</i> cluster   | <i>let-7e/miR-99b</i> cluster         | <i>miR-708</i>                        | 4.85E-04 |
| <i>miR-429</i>                  | <i>miR-451a/451b/144/4732</i> cluster | <i>miR-24-2/27a/23a</i> cluster       | 4.92E-04 |
| <i>miR-199b/3154</i> cluster    | <i>miR-373</i>                        | <i>miR-181c</i>                       | 5.02E-04 |
| <i>miR-29b</i>                  | <i>miR-451a/451b/144/4732</i> cluster | <i>miR-16-1/15a</i> cluster           | 5.16E-04 |
| <i>miR-181c</i>                 | <i>miR-708</i>                        | <i>miR-99a</i>                        | 5.16E-04 |
| <i>miR-93/106b</i> cluster      | <i>miR-373</i>                        | <i>miR-181c</i>                       | 5.17E-04 |
| <i>miR-29a</i>                  | <i>miR-181c</i>                       | <i>miR-99a</i>                        | 5.18E-04 |
| <i>miR-34a</i>                  | <i>miR-93/106b</i> cluster            | <i>miR-34a</i>                        | 5.19E-04 |
| <i>miR-181a</i>                 | <i>miR-429</i>                        | <i>miR-9-1</i>                        | 5.23E-04 |
| <i>let-7e/miR-99b</i> cluster   | <i>miR-451a/451b/144/4732</i> cluster | <i>miR-488</i>                        | 5.26E-04 |
| <i>miR-328</i>                  | <i>miR-451a/451b/144/4732</i> cluster | <i>miR-451a/451b/144/4732</i> cluster | 5.28E-04 |
| <i>miR-181a</i>                 | <i>let-7i</i>                         | <i>miR-488</i>                        | 5.42E-04 |
| <i>let-7c</i>                   | <i>miR-324</i>                        | <i>miR-451a/451b/144/4732</i> cluster | 5.50E-04 |
| <i>miR-181a</i>                 | <i>miR-181c</i>                       | <i>miR-132</i>                        | 5.54E-04 |
| <i>miR-181c</i>                 | <i>miR-488</i>                        | <i>let-7e/miR-99b</i> cluster         | 5.75E-04 |
| <i>miR-24-2/27a/23a</i> cluster | <i>miR-24-2/27a/23a</i> cluster       | <i>miR-129-2</i>                      | 5.81E-04 |
| <i>miR-181a</i>                 | <i>miR-188</i>                        | <i>miR-188</i>                        | 6.03E-04 |
| <i>let-7i</i>                   | <i>miR-196</i>                        | <i>let-7e/miR-99b</i> cluster         | 6.09E-04 |
| <i>let-7c</i>                   | <i>miR-429</i>                        | <i>miR-29a</i>                        | 6.10E-04 |
| <i>miR-29b</i>                  | <i>miR-181c</i>                       | <i>miR-24-2/27a/23a</i> cluster       | 6.28E-04 |
| <i>let-7i</i>                   | <i>miR-328</i>                        | <i>miR-132</i>                        | 6.30E-04 |
| <i>miR-29a</i>                  | <i>miR-132</i>                        | <i>miR-128b</i>                       | 6.31E-04 |
| <i>let-7i</i>                   | <i>miR-15b/miR-16-2</i> cluster       | <i>miR-181c</i>                       | 6.31E-04 |
| <i>miR-181a</i>                 | <i>miR-376a</i>                       | <i>miR-24-2/27a/23a</i> cluster       | 6.33E-04 |
| <i>let-7c</i>                   | <i>miR-29a</i>                        | <i>miR-451a/451b/144/4732</i> cluster | 6.42E-04 |
| <i>miR-16-1/15a</i> cluster     | <i>miR-15b/miR-16-2</i> cluster       | <i>miR-16-1/15a</i> cluster           | 6.44E-04 |
| <i>miR-29a</i>                  | <i>miR-181c</i>                       | <i>miR-188</i>                        | 6.44E-04 |
| <i>miR-376a</i>                 | <i>miR-31</i>                         | <i>miR-16-1/15a</i> cluster           | 6.44E-04 |
| <i>miR-181c</i>                 | <i>miR-429</i>                        | <i>let-7e/miR-99b</i> cluster         | 6.52E-04 |
| <i>miR-29b</i>                  | <i>miR-128b</i>                       | <i>miR-376a</i>                       | 6.55E-04 |
| <i>miR-29b</i>                  | <i>let-7i</i>                         | <i>miR-29b</i>                        | 6.56E-04 |
| <i>miR-24-2/27a/23a</i> cluster | <i>miR-373</i>                        | <i>miR-376a</i>                       | 6.59E-04 |
| <i>miR-181c</i>                 | <i>miR-126</i>                        | <i>miR-29a</i>                        | 6.60E-04 |
| <i>miR-128b</i>                 | <i>miR-212</i>                        | <i>miR-451a/451b/144/4732</i> cluster | 6.78E-04 |
| <i>miR-99a</i>                  | <i>miR-181c</i>                       | <i>miR-31</i>                         | 7.01E-04 |
| <i>miR-132</i>                  | <i>miR-132</i>                        | <i>miR-324</i>                        | 7.28E-04 |
| <i>let-7e/miR-99b</i> cluster   | <i>miR-211</i>                        | <i>miR-31</i>                         | 7.30E-04 |
| <i>miR-429</i>                  | <i>miR-429</i>                        | <i>miR-16-1/15a</i> cluster           | 7.39E-04 |
| <i>miR-15b/miR-16-2</i> cluster | <i>miR-196</i>                        | <i>miR-15b/miR-16-2</i> cluster       | 7.40E-04 |
| <i>miR-181c</i>                 | <i>miR-196</i>                        | <i>miR-451a/451b/144/4732</i> cluster | 7.57E-04 |
| <i>miR-16-1/15a</i> cluster     | <i>miR-29a</i>                        | <i>miR-16-1/15a</i> cluster           | 7.83E-04 |
| <i>let-7c</i>                   | <i>miR-181c</i>                       | <i>miR-181c</i>                       | 7.86E-04 |
| <i>miR-34a</i>                  | <i>miR-181c</i>                       | <i>miR-93/106b</i> cluster            | 7.91E-04 |
| <i>miR-181a</i>                 | <i>miR-24-2/27a/23a</i> cluster       | <i>miR-324</i>                        | 7.91E-04 |
| <i>miR-15b/miR-16-2</i> cluster | <i>miR-429</i>                        | <i>miR-16-1/15a</i> cluster           | 7.91E-04 |
| <i>miR-29c</i>                  | <i>miR-181c</i>                       | <i>miR-31</i>                         | 7.96E-04 |
| <i>miR-199b/3154</i> cluster    | <i>miR-199b/3154</i> cluster          | <i>miR-199b/3154</i> cluster          | 7.98E-04 |

|                                       |                                       |                                       |          |
|---------------------------------------|---------------------------------------|---------------------------------------|----------|
| <i>miR-181a</i>                       | <i>miR-324</i>                        | <i>let-7e/miR-99b</i> cluster         | 8.08E-04 |
| <i>miR-376a</i>                       | <i>miR-373</i>                        | <i>miR-181a</i>                       | 8.20E-04 |
| <i>miR-324</i>                        | <i>miR-451a/451b/144/4732</i> cluster | <i>let-7c</i>                         | 8.22E-04 |
| <i>let-7a</i>                         | <i>miR-181c</i>                       | <i>let-7i</i>                         | 8.25E-04 |
| <i>miR-34a</i>                        | <i>let-7i</i>                         | <i>miR-376a</i>                       | 8.37E-04 |
| <i>miR-29a</i>                        | <i>miR-34a</i>                        | <i>miR-34a</i>                        | 8.52E-04 |
| <i>miR-31</i>                         | <i>miR-211</i>                        | <i>let-7e/miR-99b</i> cluster         | 8.62E-04 |
| <i>miR-128b</i>                       | <i>miR-324</i>                        | <i>miR-373</i>                        | 8.70E-04 |
| <i>let-7e/miR-99b</i> cluster         | <i>let-7i</i>                         | <i>miR-196</i>                        | 8.87E-04 |
| <i>miR-708</i>                        | <i>let-7i</i>                         | <i>miR-429</i>                        | 9.07E-04 |
| <i>miR-128b</i>                       | <i>miR-216</i>                        | <i>miR-324</i>                        | 9.12E-04 |
| <i>let-7e/miR-99b</i> cluster         | <i>miR-196</i>                        | <i>let-7i</i>                         | 9.32E-04 |
| <i>miR-188</i>                        | <i>miR-708</i>                        | <i>miR-181c</i>                       | 9.32E-04 |
| <i>miR-129-2</i>                      | <i>miR-324</i>                        | <i>miR-451a/451b/144/4732</i> cluster | 9.36E-04 |
| <i>miR-132</i>                        | <i>miR-181c</i>                       | <i>miR-373</i>                        | 9.36E-04 |
| <i>miR-376a</i>                       | <i>miR-328</i>                        | <i>miR-34a</i>                        | 9.53E-04 |
| <i>miR-373</i>                        | <i>miR-451a/451b/144/4732</i> cluster | <i>miR-708</i>                        | 9.61E-04 |
| <i>miR-16-1/15a</i> cluster           | <i>miR-129-2</i>                      | <i>miR-129-2</i>                      | 9.64E-04 |
| <i>miR-128b</i>                       | <i>miR-31</i>                         | <i>miR-196</i>                        | 9.74E-04 |
| <i>miR-16-1/15a</i> cluster           | <i>miR-708</i>                        | <i>miR-16-1/15a</i> cluster           | 9.95E-04 |
| <i>miR-181a</i>                       | <i>miR-196</i>                        | <i>miR-488</i>                        | 1.01E-03 |
| <i>miR-99a</i>                        | <i>miR-708</i>                        | <i>miR-181c</i>                       | 1.01E-03 |
| <i>miR-29a</i>                        | <i>miR-216</i>                        | <i>miR-10b</i>                        | 1.02E-03 |
| <i>miR-708</i>                        | <i>miR-373</i>                        | <i>miR-451a/451b/144/4732</i> cluster | 1.03E-03 |
| <i>miR-29a</i>                        | <i>miR-429</i>                        | <i>miR-16-1/15a</i> cluster           | 1.03E-03 |
| <i>miR-24-2/27a/23a</i> cluster       | <i>miR-10b</i>                        | <i>miR-34a</i>                        | 1.04E-03 |
| <i>miR-29a</i>                        | <i>miR-451a/451b/144/4732</i> cluster | <i>let-7c</i>                         | 1.05E-03 |
| <i>let-7e/miR-99b</i> cluster         | <i>miR-15b/miR-16-2</i> cluster       | <i>miR-376a</i>                       | 1.06E-03 |
| <i>miR-99a</i>                        | <i>miR-181c</i>                       | <i>miR-708</i>                        | 1.07E-03 |
| <i>miR-132</i>                        | <i>miR-132</i>                        | <i>miR-93/106b</i> cluster            | 1.10E-03 |
| <i>miR-29b</i>                        | <i>miR-24-2/27a/23a</i> cluster       | <i>let-7i</i>                         | 1.11E-03 |
| <i>miR-129-2</i>                      | <i>miR-24-2/27a/23a</i> cluster       | <i>miR-24-2/27a/23a</i> cluster       | 1.11E-03 |
| <i>miR-126</i>                        | <i>miR-10b</i>                        | <i>miR-31</i>                         | 1.13E-03 |
| <i>miR-451a/451b/144/4732</i> cluster | <i>miR-489</i>                        | <i>miR-16-1/15a</i> cluster           | 1.14E-03 |
| <i>miR-9-1</i>                        | <i>miR-451a/451b/144/4732</i> cluster | <i>let-7a</i>                         | 1.16E-03 |
| <i>miR-16-1/15a</i> cluster           | <i>miR-31</i>                         | <i>miR-376a</i>                       | 1.17E-03 |
| <i>miR-29a</i>                        | <i>miR-429</i>                        | <i>let-7c</i>                         | 1.19E-03 |
| <i>miR-29a</i>                        | <i>miR-181c</i>                       | <i>miR-31</i>                         | 1.20E-03 |
| <i>miR-128b</i>                       | <i>miR-196</i>                        | <i>miR-31</i>                         | 1.22E-03 |
| <i>miR-181c</i>                       | <i>miR-188</i>                        | <i>miR-708</i>                        | 1.25E-03 |
| <i>let-7b/miR-4763</i> cluster        | <i>miR-132</i>                        | <i>miR-181c</i>                       | 1.27E-03 |
| <i>miR-128b</i>                       | <i>miR-181c</i>                       | <i>miR-16-1/15a</i> cluster           | 1.28E-03 |
| <i>miR-16-1/15a</i> cluster           | <i>miR-181c</i>                       | <i>miR-128b</i>                       | 1.30E-03 |
| <i>let-7b/miR-4763</i> cluster        | <i>miR-31</i>                         | <i>miR-181a</i>                       | 1.31E-03 |
| <i>miR-29a</i>                        | <i>miR-128b</i>                       | <i>miR-128b</i>                       | 1.32E-03 |
| <i>miR-31</i>                         | <i>miR-10b</i>                        | <i>miR-708</i>                        | 1.33E-03 |
| <i>let-7d</i>                         | <i>miR-376a</i>                       | <i>miR-31</i>                         | 1.36E-03 |
| <i>miR-181a</i>                       | <i>miR-24-2/27a/23a</i> cluster       | <i>miR-199b/3154</i> cluster          | 1.37E-03 |
| <i>miR-451a/451b/144/4732</i> cluster | <i>miR-451a/451b/144/4732</i> cluster | <i>miR-181a</i>                       | 1.40E-03 |
| <i>miR-16-1/15a</i> cluster           | <i>miR-376a</i>                       | <i>miR-199b/3154</i> cluster          | 1.40E-03 |

|                                       |                                       |                                       |          |
|---------------------------------------|---------------------------------------|---------------------------------------|----------|
| <i>miR-24-2/27a/23a</i> cluster       | <i>miR-199b/3154</i> cluster          | <i>miR-181a</i>                       | 1.41E-03 |
| <i>miR-16-1/15a</i> cluster           | <i>miR-15b/miR-16-2</i> cluster       | <i>miR-216</i>                        | 1.41E-03 |
| <i>miR-708</i>                        | <i>miR-10b</i>                        | <i>miR-451a/451b/144/4732</i> cluster | 1.44E-03 |
| <i>miR-16-1/15a</i> cluster           | <i>let-7i</i>                         | <i>miR-24-2/27a/23a</i> cluster       | 1.46E-03 |
| <i>miR-324</i>                        | <i>miR-451a/451b/144/4732</i> cluster | <i>miR-129-2</i>                      | 1.46E-03 |
| <i>miR-132</i>                        | <i>miR-10b</i>                        | <i>miR-212</i>                        | 1.48E-03 |
| <i>miR-376a</i>                       | <i>miR-708</i>                        | <i>miR-181c</i>                       | 1.49E-03 |
| <i>let-7a</i>                         | <i>let-7i</i>                         | <i>miR-181c</i>                       | 1.51E-03 |
| <i>miR-16-1/15a</i> cluster           | <i>miR-429</i>                        | <i>miR-429</i>                        | 1.51E-03 |
| <i>miR-29a</i>                        | <i>miR-126</i>                        | <i>miR-181c</i>                       | 1.51E-03 |
| <i>miR-29b</i>                        | <i>miR-29b</i>                        | <i>miR-199b/3154</i> cluster          | 1.51E-03 |
| <i>miR-132</i>                        | <i>miR-10b</i>                        | <i>miR-29a</i>                        | 1.51E-03 |
| <i>miR-188</i>                        | <i>let-7i</i>                         | <i>miR-181c</i>                       | 1.51E-03 |
| <i>miR-216</i>                        | <i>miR-10b</i>                        | <i>miR-29a</i>                        | 1.51E-03 |
| <i>miR-181c</i>                       | <i>let-7i</i>                         | <i>let-7a</i>                         | 1.51E-03 |
| <i>miR-328</i>                        | <i>miR-328</i>                        | <i>miR-328</i>                        | 1.51E-03 |
| <i>miR-128b</i>                       | <i>miR-211</i>                        | <i>miR-128b</i>                       | 1.55E-03 |
| <i>miR-324</i>                        | <i>miR-324</i>                        | <i>miR-199b/3154</i> cluster          | 1.59E-03 |
| <i>miR-16-1/15a</i> cluster           | <i>miR-29a</i>                        | <i>miR-429</i>                        | 1.67E-03 |
| <i>let-7e/miR-99b</i> cluster         | <i>let-7e/miR-99b</i> cluster         | <i>miR-376a</i>                       | 1.67E-03 |
| <i>let-7c</i>                         | <i>miR-376a</i>                       | <i>miR-181a</i>                       | 1.69E-03 |
| <i>let-7e/miR-99b</i> cluster         | <i>miR-488</i>                        | <i>miR-451a/451b/144/4732</i> cluster | 1.69E-03 |
| <i>miR-129-2</i>                      | <i>miR-31</i>                         | <i>miR-181c</i>                       | 1.70E-03 |
| <i>miR-29b</i>                        | <i>miR-24-2/27a/23a</i> cluster       | <i>miR-181c</i>                       | 1.70E-03 |
| <i>miR-16-1/15a</i> cluster           | <i>miR-29b</i>                        | <i>miR-451a/451b/144/4732</i> cluster | 1.70E-03 |
| <i>miR-16-1/15a</i> cluster           | <i>let-7e/miR-99b</i> cluster         | <i>let-7e/miR-99b</i> cluster         | 1.71E-03 |
| <i>miR-181a</i>                       | <i>miR-324</i>                        | <i>miR-24-2/27a/23a</i> cluster       | 1.71E-03 |
| <i>miR-24-2/27a/23a</i> cluster       | <i>miR-489</i>                        | <i>miR-489</i>                        | 1.71E-03 |
| <i>miR-16-1/15a</i> cluster           | <i>miR-212</i>                        | <i>miR-181a</i>                       | 1.73E-03 |
| <i>miR-181c</i>                       | <i>miR-24-2/27a/23a</i> cluster       | <i>miR-324</i>                        | 1.73E-03 |
| <i>miR-132</i>                        | <i>miR-181a</i>                       | <i>miR-128b</i>                       | 1.73E-03 |
| <i>miR-128b</i>                       | <i>miR-128b</i>                       | <i>miR-9-1</i>                        | 1.74E-03 |
| <i>miR-93/106b</i> cluster            | <i>miR-181c</i>                       | <i>miR-373</i>                        | 1.75E-03 |
| <i>miR-376a</i>                       | <i>miR-451a/451b/144/4732</i> cluster | <i>miR-488</i>                        | 1.76E-03 |
| <i>let-7c</i>                         | <i>miR-16-1/15a</i> cluster           | <i>miR-199b/3154</i> cluster          | 1.78E-03 |
| <i>miR-188</i>                        | <i>let-7i</i>                         | <i>miR-128b</i>                       | 1.78E-03 |
| <i>miR-181a</i>                       | <i>let-7i</i>                         | <i>miR-708</i>                        | 1.78E-03 |
| <i>miR-376a</i>                       | <i>miR-15b/miR-16-2</i> cluster       | <i>miR-24-2/27a/23a</i> cluster       | 1.79E-03 |
| <i>miR-181c</i>                       | <i>miR-24-2/27a/23a</i> cluster       | <i>let-7d</i>                         | 1.79E-03 |
| <i>miR-34a</i>                        | <i>miR-451a/451b/144/4732</i> cluster | <i>miR-34a</i>                        | 1.80E-03 |
| <i>let-7d</i>                         | <i>miR-181c</i>                       | <i>miR-132</i>                        | 1.80E-03 |
| <i>miR-488</i>                        | <i>miR-451a/451b/144/4732</i> cluster | <i>let-7e/miR-99b</i> cluster         | 1.81E-03 |
| <i>miR-15b/miR-16-2</i> cluster       | <i>miR-24-2/27a/23a</i> cluster       | <i>miR-376a</i>                       | 1.82E-03 |
| <i>miR-9-1</i>                        | <i>miR-376a</i>                       | <i>miR-212</i>                        | 1.82E-03 |
| <i>miR-451a/451b/144/4732</i> cluster | <i>miR-489</i>                        | <i>miR-376a</i>                       | 1.82E-03 |
| <i>miR-16-1/15a</i> cluster           | <i>miR-128b</i>                       | <i>miR-181c</i>                       | 1.83E-03 |
| <i>miR-128b</i>                       | <i>miR-376a</i>                       | <i>miR-373</i>                        | 1.83E-03 |
| <i>miR-129-2</i>                      | <i>miR-451a/451b/144/4732</i> cluster | <i>miR-324</i>                        | 1.85E-03 |
| <i>miR-16-1/15a</i> cluster           | <i>miR-24-2/27a/23a</i> cluster       | <i>let-7i</i>                         | 1.86E-03 |
| <i>miR-181a</i>                       | <i>miR-488</i>                        | <i>miR-15b/miR-16-2</i> cluster       | 1.91E-03 |

|                 |                                       |                                 |          |
|-----------------|---------------------------------------|---------------------------------|----------|
| <i>miR-181c</i> | <i>miR-328</i>                        | <i>miR-31</i>                   | 1.93E-03 |
| <i>miR-132</i>  | <i>miR-708</i>                        | <i>miR-181a</i>                 | 1.95E-03 |
| <i>miR-31</i>   | <i>miR-216</i>                        | <i>miR-31</i>                   | 1.95E-03 |
| <i>miR-29a</i>  | <i>miR-188</i>                        | <i>miR-24-2/27a/23a</i> cluster | 1.95E-03 |
| <i>miR-128b</i> | <i>miR-376a</i>                       | <i>miR-328</i>                  | 1.95E-03 |
| <i>miR-181a</i> | <i>miR-216</i>                        | <i>miR-181c</i>                 | 1.96E-03 |
| <i>miR-376a</i> | <i>miR-328</i>                        | <i>miR-128b</i>                 | 1.97E-03 |
| <i>miR-29b</i>  | <i>miR-31</i>                         | <i>let-7i</i>                   | 1.97E-03 |
| <i>miR-128b</i> | <i>miR-451a/451b/144/4732</i> cluster | <i>miR-212</i>                  | 1.97E-03 |



**Supplementary Table 12** List of miRNAs (*miR-C*) that Showed Significant GI (Q-value < 0.002) with Two-Wise miRNA Combinations (*miR-A* + *miR-B*) in Modifying OVCAR8-ADR Cell Proliferation Based on Pooled Screening

| <i>miR-A</i>                    | <i>miR-B</i>                          | <i>miR-C</i>                          | Q-value  |
|---------------------------------|---------------------------------------|---------------------------------------|----------|
| <i>miR-16-1/15a</i> cluster     | <i>miR-181c</i>                       | <i>let-7e/miR-99b</i> cluster         | 7.79E-32 |
| <i>let-7e/miR-99b</i> cluster   | <i>miR-16-1/15a</i> cluster           | <i>miR-181c</i>                       | 1.35E-30 |
| <i>let-7e/miR-99b</i> cluster   | <i>miR-181c</i>                       | <i>miR-16-1/15a</i> cluster           | 5.16E-25 |
| <i>miR-29a</i>                  | <i>miR-15b/miR-16-2</i> cluster       | <i>miR-29a</i>                        | 1.57E-21 |
| <i>miR-376a</i>                 | <i>miR-376a</i>                       | <i>miR-29b</i>                        | 1.57E-21 |
| <i>miR-488</i>                  | <i>let-7i</i>                         | <i>let-7d</i>                         | 1.27E-20 |
| <i>let-7d</i>                   | <i>miR-488</i>                        | <i>let-7i</i>                         | 7.41E-20 |
| <i>let-7d</i>                   | <i>let-7i</i>                         | <i>miR-488</i>                        | 1.33E-19 |
| <i>miR-29a</i>                  | <i>miR-29a</i>                        | <i>miR-15b/miR-16-2</i> cluster       | 1.93E-19 |
| <i>miR-29b</i>                  | <i>miR-376a</i>                       | <i>miR-376a</i>                       | 8.94E-19 |
| <i>miR-708</i>                  | <i>let-7i</i>                         | <i>let-7i</i>                         | 6.10E-18 |
| <i>let-7a</i>                   | <i>miR-376a</i>                       | <i>miR-199b/3154</i> cluster          | 1.89E-17 |
| <i>let-7i</i>                   | <i>miR-451a/451b/144/4732</i> cluster | <i>miR-708</i>                        | 6.56E-17 |
| <i>let-7d</i>                   | <i>miR-10b</i>                        | <i>miR-181c</i>                       | 1.27E-16 |
| <i>miR-188</i>                  | <i>miR-324</i>                        | <i>miR-376a</i>                       | 1.27E-16 |
| <i>let-7i</i>                   | <i>let-7i</i>                         | <i>miR-708</i>                        | 1.40E-16 |
| <i>miR-188</i>                  | <i>miR-376a</i>                       | <i>miR-324</i>                        | 3.07E-16 |
| <i>miR-324</i>                  | <i>miR-376a</i>                       | <i>miR-188</i>                        | 3.49E-16 |
| <i>let-7a</i>                   | <i>miR-199b/3154</i> cluster          | <i>miR-376a</i>                       | 4.39E-16 |
| <i>miR-181c</i>                 | <i>miR-10b</i>                        | <i>let-7d</i>                         | 1.29E-15 |
| <i>let-7d</i>                   | <i>miR-181c</i>                       | <i>miR-10b</i>                        | 4.13E-15 |
| <i>miR-29c</i>                  | <i>miR-181a</i>                       | <i>miR-376a</i>                       | 1.83E-14 |
| <i>miR-126</i>                  | <i>miR-126</i>                        | <i>miR-29a</i>                        | 4.54E-13 |
| <i>miR-128b</i>                 | <i>let-7i</i>                         | <i>miR-212</i>                        | 4.78E-13 |
| <i>miR-212</i>                  | <i>let-7i</i>                         | <i>miR-128b</i>                       | 5.20E-13 |
| <i>miR-29c</i>                  | <i>miR-376a</i>                       | <i>miR-181a</i>                       | 6.50E-13 |
| <i>miR-29a</i>                  | <i>miR-181c</i>                       | <i>miR-9-1</i>                        | 6.61E-13 |
| <i>miR-708</i>                  | <i>miR-451a/451b/144/4732</i> cluster | <i>let-7i</i>                         | 6.61E-13 |
| <i>miR-128b</i>                 | <i>miR-132</i>                        | <i>miR-29a</i>                        | 6.84E-13 |
| <i>miR-128b</i>                 | <i>miR-128b</i>                       | <i>miR-211</i>                        | 8.31E-13 |
| <i>miR-15b/miR-16-2</i> cluster | <i>miR-31</i>                         | <i>miR-132</i>                        | 9.35E-13 |
| <i>miR-132</i>                  | <i>miR-15b/miR-16-2</i> cluster       | <i>miR-31</i>                         | 1.12E-12 |
| <i>miR-181c</i>                 | <i>miR-373</i>                        | <i>let-7i</i>                         | 1.80E-12 |
| <i>miR-376a</i>                 | <i>miR-199b/3154</i> cluster          | <i>let-7a</i>                         | 1.80E-12 |
| <i>miR-9-1</i>                  | <i>miR-181c</i>                       | <i>miR-29a</i>                        | 2.03E-12 |
| <i>miR-181c</i>                 | <i>miR-212</i>                        | <i>miR-212</i>                        | 2.94E-12 |
| <i>miR-128b</i>                 | <i>miR-212</i>                        | <i>let-7i</i>                         | 4.71E-12 |
| <i>let-7e/miR-99b</i> cluster   | <i>miR-31</i>                         | <i>miR-324</i>                        | 5.29E-12 |
| <i>miR-29a</i>                  | <i>miR-181c</i>                       | <i>miR-126</i>                        | 5.53E-12 |
| <i>miR-181c</i>                 | <i>let-7i</i>                         | <i>miR-373</i>                        | 7.63E-12 |
| <i>miR-132</i>                  | <i>miR-31</i>                         | <i>miR-15b/miR-16-2</i> cluster       | 1.20E-11 |
| <i>miR-132</i>                  | <i>miR-451a/451b/144/4732</i> cluster | <i>let-7i</i>                         | 1.20E-11 |
| <i>miR-16-1/15a</i> cluster     | <i>miR-24-2/27a/23a</i> cluster       | <i>miR-451a/451b/144/4732</i> cluster | 1.61E-11 |
| <i>miR-708</i>                  | <i>let-7i</i>                         | <i>miR-451a/451b/144/4732</i>         | 1.61E-11 |



|                                       |                                       |                                       |          |
|---------------------------------------|---------------------------------------|---------------------------------------|----------|
|                                       |                                       | cluster                               |          |
| <i>miR-9-1</i>                        | <i>miR-29a</i>                        | <i>miR-181c</i>                       | 1.68E-11 |
| <i>miR-24-2/27a/23a</i> cluster       | <i>miR-451a/451b/144/4732</i> cluster | <i>miR-16-1/15a</i> cluster           | 1.92E-11 |
| <i>miR-128b</i>                       | <i>miR-211</i>                        | <i>miR-128b</i>                       | 1.93E-11 |
| <i>miR-29a</i>                        | <i>miR-128b</i>                       | <i>miR-132</i>                        | 2.07E-11 |
| <i>miR-132</i>                        | <i>miR-324</i>                        | <i>miR-324</i>                        | 2.44E-11 |
| <i>miR-324</i>                        | <i>miR-324</i>                        | <i>miR-132</i>                        | 4.36E-11 |
| <i>miR-29a</i>                        | <i>miR-199b/3154</i> cluster          | <i>let-7i</i>                         | 5.50E-11 |
| <i>miR-181c</i>                       | <i>miR-126</i>                        | <i>miR-29a</i>                        | 5.76E-11 |
| <i>miR-29a</i>                        | <i>let-7i</i>                         | <i>miR-199b/3154</i> cluster          | 6.54E-11 |
| <i>miR-16-1/15a</i> cluster           | <i>miR-451a/451b/144/4732</i> cluster | <i>miR-24-2/27a/23a</i> cluster       | 8.66E-11 |
| <i>miR-181a</i>                       | <i>let-7i</i>                         | <i>miR-216</i>                        | 1.34E-10 |
| <i>miR-181a</i>                       | <i>miR-24-2/27a/23a</i> cluster       | <i>miR-376a</i>                       | 1.68E-10 |
| <i>let-7e/miR-99b</i> cluster         | <i>miR-376a</i>                       | <i>miR-188</i>                        | 1.85E-10 |
| <i>miR-132</i>                        | <i>miR-132</i>                        | <i>miR-181a</i>                       | 1.96E-10 |
| <i>let-7i</i>                         | <i>miR-373</i>                        | <i>miR-181c</i>                       | 1.96E-10 |
| <i>miR-29a</i>                        | <i>miR-126</i>                        | <i>miR-126</i>                        | 1.99E-10 |
| <i>miR-212</i>                        | <i>miR-212</i>                        | <i>miR-181c</i>                       | 1.99E-10 |
| <i>miR-324</i>                        | <i>miR-31</i>                         | <i>let-7e/miR-99b</i> cluster         | 2.24E-10 |
| <i>let-7e/miR-99b</i> cluster         | <i>miR-324</i>                        | <i>miR-31</i>                         | 2.47E-10 |
| <i>miR-29a</i>                        | <i>miR-132</i>                        | <i>miR-128b</i>                       | 2.97E-10 |
| <i>miR-181a</i>                       | <i>miR-376a</i>                       | <i>miR-29c</i>                        | 2.97E-10 |
| <i>miR-29a</i>                        | <i>miR-126</i>                        | <i>miR-181c</i>                       | 3.00E-10 |
| <i>let-7e/miR-99b</i> cluster         | <i>miR-128b</i>                       | <i>miR-16-1/15a</i> cluster           | 7.08E-10 |
| <i>miR-16-1/15a</i> cluster           | <i>miR-29b</i>                        | <i>miR-31</i>                         | 9.81E-10 |
| <i>let-7i</i>                         | <i>miR-199b/3154</i> cluster          | <i>miR-29a</i>                        | 9.81E-10 |
| <i>miR-181c</i>                       | <i>miR-324</i>                        | <i>miR-9-1</i>                        | 1.16E-09 |
| <i>miR-29b</i>                        | <i>miR-31</i>                         | <i>miR-16-1/15a</i> cluster           | 1.39E-09 |
| <i>miR-16-1/15a</i> cluster           | <i>miR-31</i>                         | <i>miR-29b</i>                        | 1.83E-09 |
| <i>let-7c</i>                         | <i>let-7c</i>                         | <i>miR-181a</i>                       | 2.26E-09 |
| <i>miR-99a</i>                        | <i>miR-376a</i>                       | <i>miR-29a</i>                        | 2.84E-09 |
| <i>miR-132</i>                        | <i>let-7i</i>                         | <i>miR-451a/451b/144/4732</i> cluster | 3.20E-09 |
| <i>miR-128b</i>                       | <i>miR-489</i>                        | <i>miR-181c</i>                       | 4.17E-09 |
| <i>let-7e/miR-99b</i> cluster         | <i>miR-188</i>                        | <i>miR-376a</i>                       | 6.89E-09 |
| <i>miR-99a</i>                        | <i>miR-31</i>                         | <i>miR-181c</i>                       | 7.75E-09 |
| <i>miR-181a</i>                       | <i>miR-376a</i>                       | <i>miR-24-2/27a/23a</i> cluster       | 7.75E-09 |
| <i>miR-31</i>                         | <i>miR-10b</i>                        | <i>miR-181c</i>                       | 8.17E-09 |
| <i>miR-29a</i>                        | <i>miR-376a</i>                       | <i>miR-99a</i>                        | 8.36E-09 |
| <i>let-7e/miR-99b</i> cluster         | <i>miR-24-2/27a/23a</i> cluster       | <i>miR-10b</i>                        | 8.94E-09 |
| <i>miR-451a/451b/144/4732</i> cluster | <i>miR-10b</i>                        | <i>let-7d</i>                         | 9.59E-09 |
| <i>let-7c</i>                         | <i>miR-128b</i>                       | <i>miR-376a</i>                       | 9.68E-09 |
| <i>miR-376a</i>                       | <i>miR-24-2/27a/23a</i> cluster       | <i>miR-181a</i>                       | 9.68E-09 |
| <i>miR-488</i>                        | <i>miR-488</i>                        | <i>miR-181c</i>                       | 1.16E-08 |
| <i>miR-29a</i>                        | <i>miR-99a</i>                        | <i>miR-376a</i>                       | 1.29E-08 |
| <i>miR-188</i>                        | <i>miR-376a</i>                       | <i>let-7e/miR-99b</i> cluster         | 1.29E-08 |
| <i>let-7e/miR-99b</i> cluster         | <i>miR-10b</i>                        | <i>miR-24-2/27a/23a</i> cluster       | 1.33E-08 |
| <i>miR-181a</i>                       | <i>let-7i</i>                         | <i>miR-376a</i>                       | 1.41E-08 |
| <i>let-7c</i>                         | <i>miR-181a</i>                       | <i>let-7c</i>                         | 1.46E-08 |
| <i>miR-99a</i>                        | <i>miR-181c</i>                       | <i>miR-31</i>                         | 1.49E-08 |
| <i>miR-29b</i>                        | <i>miR-128b</i>                       | <i>let-7c</i>                         | 1.58E-08 |

|                                 |                                       |                                       |          |
|---------------------------------|---------------------------------------|---------------------------------------|----------|
| <i>miR-181c</i>                 | <i>miR-10b</i>                        | <i>miR-31</i>                         | 2.09E-08 |
| <i>miR-128b</i>                 | <i>miR-181a</i>                       | <i>miR-10b</i>                        | 2.42E-08 |
| <i>miR-24-2/27a/23a</i> cluster | <i>miR-199b/3154</i> cluster          | <i>miR-24-2/27a/23a</i> cluster       | 2.58E-08 |
| <i>miR-196</i>                  | <i>miR-199b/3154</i> cluster          | <i>miR-181c</i>                       | 3.14E-08 |
| <i>miR-181c</i>                 | <i>miR-489</i>                        | <i>miR-128b</i>                       | 4.86E-08 |
| <i>miR-16-1/15a</i> cluster     | <i>let-7e/miR-99b</i> cluster         | <i>miR-128b</i>                       | 5.01E-08 |
| <i>miR-181c</i>                 | <i>miR-488</i>                        | <i>miR-488</i>                        | 5.01E-08 |
| <i>miR-9-1</i>                  | <i>miR-181c</i>                       | <i>miR-324</i>                        | 5.12E-08 |
| <i>let-7i</i>                   | <i>miR-216</i>                        | <i>miR-181a</i>                       | 5.12E-08 |
| <i>miR-181a</i>                 | <i>miR-24-2/27a/23a</i> cluster       | <i>miR-451a/451b/144/4732</i> cluster | 6.42E-08 |
| <i>miR-16-1/15a</i> cluster     | <i>miR-128b</i>                       | <i>let-7e/miR-99b</i> cluster         | 7.45E-08 |
| <i>miR-188</i>                  | <i>miR-31</i>                         | <i>miR-181c</i>                       | 8.13E-08 |
| <i>miR-181c</i>                 | <i>miR-15b/miR-16-2</i> cluster       | <i>let-7c</i>                         | 8.48E-08 |
| <i>miR-128b</i>                 | <i>miR-451a/451b/144/4732</i> cluster | <i>miR-132</i>                        | 1.17E-07 |
| <i>let-7d</i>                   | <i>miR-128b</i>                       | <i>miR-181c</i>                       | 1.28E-07 |
| <i>let-7a</i>                   | <i>miR-181c</i>                       | <i>miR-324</i>                        | 1.31E-07 |
| <i>miR-9-1</i>                  | <i>miR-324</i>                        | <i>miR-181c</i>                       | 1.44E-07 |
| <i>miR-34a</i>                  | <i>miR-31</i>                         | <i>miR-34a</i>                        | 1.44E-07 |
| <i>let-7i</i>                   | <i>miR-24-2/27a/23a</i> cluster       | <i>miR-376a</i>                       | 1.55E-07 |
| <i>let-7c</i>                   | <i>miR-376a</i>                       | <i>miR-128b</i>                       | 1.77E-07 |
| <i>miR-29b</i>                  | <i>miR-376a</i>                       | <i>miR-10b</i>                        | 1.78E-07 |
| <i>miR-128b</i>                 | <i>miR-10b</i>                        | <i>miR-181a</i>                       | 1.80E-07 |
| <i>miR-24-2/27a/23a</i> cluster | <i>miR-10b</i>                        | <i>let-7e/miR-99b</i> cluster         | 1.86E-07 |
| <i>miR-16-1/15a</i> cluster     | <i>miR-29a</i>                        | <i>miR-488</i>                        | 1.89E-07 |
| <i>let-7d</i>                   | <i>miR-181c</i>                       | <i>miR-128b</i>                       | 1.97E-07 |
| <i>miR-181c</i>                 | <i>miR-196</i>                        | <i>miR-199b/3154</i> cluster          | 1.99E-07 |
| <i>miR-181c</i>                 | <i>miR-199b/3154</i> cluster          | <i>miR-196</i>                        | 2.03E-07 |
| <i>let-7c</i>                   | <i>miR-29b</i>                        | <i>miR-128b</i>                       | 2.18E-07 |
| <i>miR-29a</i>                  | <i>miR-488</i>                        | <i>miR-16-1/15a</i> cluster           | 2.18E-07 |
| <i>miR-181a</i>                 | <i>miR-216</i>                        | <i>let-7i</i>                         | 2.18E-07 |
| <i>miR-181a</i>                 | <i>miR-451a/451b/144/4732</i> cluster | <i>miR-24-2/27a/23a</i> cluster       | 2.18E-07 |
| <i>miR-324</i>                  | <i>miR-31</i>                         | <i>miR-451a/451b/144/4732</i> cluster | 2.18E-07 |
| <i>miR-128b</i>                 | <i>miR-376a</i>                       | <i>let-7c</i>                         | 2.83E-07 |
| <i>miR-29a</i>                  | <i>miR-451a/451b/144/4732</i> cluster | <i>miR-29b</i>                        | 2.98E-07 |
| <i>miR-181c</i>                 | <i>miR-31</i>                         | <i>miR-10b</i>                        | 3.13E-07 |
| <i>let-7i</i>                   | <i>let-7i</i>                         | <i>miR-216</i>                        | 3.31E-07 |
| <i>miR-181c</i>                 | <i>miR-31</i>                         | <i>miR-99a</i>                        | 3.33E-07 |
| <i>miR-29a</i>                  | <i>miR-126</i>                        | <i>let-7i</i>                         | 3.63E-07 |
| <i>let-7e/miR-99b</i> cluster   | <i>miR-181a</i>                       | <i>miR-132</i>                        | 3.73E-07 |
| <i>miR-24-2/27a/23a</i> cluster | <i>miR-451a/451b/144/4732</i> cluster | <i>miR-181a</i>                       | 4.03E-07 |
| <i>let-7a</i>                   | <i>miR-324</i>                        | <i>miR-181c</i>                       | 4.51E-07 |
| <i>miR-376a</i>                 | <i>let-7i</i>                         | <i>miR-24-2/27a/23a</i> cluster       | 4.61E-07 |
| <i>let-7c</i>                   | <i>miR-181c</i>                       | <i>miR-15b/miR-16-2</i> cluster       | 4.61E-07 |
| <i>let-7i</i>                   | <i>miR-196</i>                        | <i>miR-128b</i>                       | 5.21E-07 |
| <i>miR-181c</i>                 | <i>miR-188</i>                        | <i>miR-31</i>                         | 5.38E-07 |
| <i>let-7i</i>                   | <i>miR-451a/451b/144/4732</i> cluster | <i>miR-132</i>                        | 5.65E-07 |
| <i>let-7d</i>                   | <i>miR-181c</i>                       | <i>miR-132</i>                        | 5.77E-07 |

|                                 |                                       |                                       |          |
|---------------------------------|---------------------------------------|---------------------------------------|----------|
| <i>miR-31</i>                   | <i>miR-451a/451b/144/4732</i> cluster | <i>miR-324</i>                        | 6.12E-07 |
| <i>miR-129-2</i>                | <i>miR-24-2/27a/23a</i> cluster       | <i>miR-24-2/27a/23a</i> cluster       | 6.42E-07 |
| <i>let-7e/miR-99b</i> cluster   | <i>miR-132</i>                        | <i>miR-181a</i>                       | 6.42E-07 |
| <i>let-7c</i>                   | <i>miR-128b</i>                       | <i>miR-29b</i>                        | 6.44E-07 |
| <i>miR-181c</i>                 | <i>miR-429</i>                        | <i>let-7e/miR-99b</i> cluster         | 6.58E-07 |
| <i>miR-31</i>                   | <i>miR-373</i>                        | <i>miR-31</i>                         | 6.59E-07 |
| <i>miR-181a</i>                 | <i>miR-10b</i>                        | <i>miR-128b</i>                       | 6.71E-07 |
| <i>miR-181c</i>                 | <i>miR-216</i>                        | <i>let-7i</i>                         | 7.07E-07 |
| <i>miR-132</i>                  | <i>miR-181c</i>                       | <i>let-7d</i>                         | 7.58E-07 |
| <i>miR-9-1</i>                  | <i>miR-376a</i>                       | <i>miR-10b</i>                        | 7.70E-07 |
| <i>miR-31</i>                   | <i>miR-31</i>                         | <i>miR-373</i>                        | 7.70E-07 |
| <i>miR-132</i>                  | <i>miR-181a</i>                       | <i>miR-132</i>                        | 1.02E-06 |
| <i>miR-181c</i>                 | <i>miR-324</i>                        | <i>let-7a</i>                         | 1.02E-06 |
| <i>miR-128b</i>                 | <i>miR-132</i>                        | <i>miR-10b</i>                        | 1.20E-06 |
| <i>miR-29a</i>                  | <i>miR-29b</i>                        | <i>miR-451a/451b/144/4732</i> cluster | 1.25E-06 |
| <i>miR-708</i>                  | <i>miR-451a/451b/144/4732</i> cluster | <i>miR-376a</i>                       | 1.25E-06 |
| <i>miR-16-1/15a</i> cluster     | <i>miR-488</i>                        | <i>miR-29a</i>                        | 1.32E-06 |
| <i>miR-128b</i>                 | <i>miR-181c</i>                       | <i>miR-489</i>                        | 1.37E-06 |
| <i>miR-181a</i>                 | <i>miR-31</i>                         | <i>miR-429</i>                        | 1.56E-06 |
| <i>let-7i</i>                   | <i>miR-15b/miR-16-2</i> cluster       | <i>miR-181a</i>                       | 1.88E-06 |
| <i>let-7i</i>                   | <i>miR-126</i>                        | <i>miR-29a</i>                        | 1.92E-06 |
| <i>miR-324</i>                  | <i>miR-451a/451b/144/4732</i> cluster | <i>miR-31</i>                         | 2.07E-06 |
| <i>miR-376a</i>                 | <i>let-7i</i>                         | <i>miR-181a</i>                       | 2.28E-06 |
| <i>miR-128b</i>                 | <i>miR-451a/451b/144/4732</i> cluster | <i>miR-212</i>                        | 2.29E-06 |
| <i>miR-24-2/27a/23a</i> cluster | <i>miR-24-2/27a/23a</i> cluster       | <i>miR-188</i>                        | 2.33E-06 |
| <i>miR-181a</i>                 | <i>miR-429</i>                        | <i>miR-31</i>                         | 2.55E-06 |
| <i>miR-128b</i>                 | <i>let-7i</i>                         | <i>miR-196</i>                        | 2.67E-06 |
| <i>miR-181c</i>                 | <i>miR-31</i>                         | <i>miR-188</i>                        | 2.86E-06 |
| <i>miR-31</i>                   | <i>miR-429</i>                        | <i>miR-181a</i>                       | 2.86E-06 |
| <i>miR-29b</i>                  | <i>miR-10b</i>                        | <i>miR-376a</i>                       | 3.07E-06 |
| <i>miR-376a</i>                 | <i>miR-451a/451b/144/4732</i> cluster | <i>miR-708</i>                        | 3.27E-06 |
| <i>miR-29a</i>                  | <i>miR-181a</i>                       | <i>miR-429</i>                        | 3.40E-06 |
| <i>miR-31</i>                   | <i>miR-489</i>                        | <i>let-7a</i>                         | 3.43E-06 |
| <i>miR-128b</i>                 | <i>miR-181c</i>                       | <i>let-7d</i>                         | 3.47E-06 |
| <i>let-7a</i>                   | <i>miR-15b/miR-16-2</i> cluster       | <i>miR-376a</i>                       | 3.50E-06 |
| <i>miR-181a</i>                 | <i>miR-15b/miR-16-2</i> cluster       | <i>let-7i</i>                         | 3.83E-06 |
| <i>let-7c</i>                   | <i>miR-15b/miR-16-2</i> cluster       | <i>miR-181c</i>                       | 4.78E-06 |
| <i>miR-188</i>                  | <i>miR-10b</i>                        | <i>miR-451a/451b/144/4732</i> cluster | 4.91E-06 |
| <i>miR-29b</i>                  | <i>miR-451a/451b/144/4732</i> cluster | <i>miR-29a</i>                        | 5.49E-06 |
| <i>let-7c</i>                   | <i>let-7c</i>                         | <i>miR-328</i>                        | 5.61E-06 |
| <i>miR-29a</i>                  | <i>let-7i</i>                         | <i>miR-126</i>                        | 5.74E-06 |
| <i>miR-16-1/15a</i> cluster     | <i>miR-16-1/15a</i> cluster           | <i>miR-488</i>                        | 6.02E-06 |
| <i>miR-34a</i>                  | <i>miR-451a/451b/144/4732</i> cluster | <i>miR-328</i>                        | 6.57E-06 |
| <i>let-7e/miR-99b</i> cluster   | <i>miR-488</i>                        | <i>miR-10b</i>                        | 6.91E-06 |
| <i>miR-16-1/15a</i> cluster     | <i>miR-16-1/15a</i> cluster           | <i>miR-199b/3154</i> cluster          | 6.98E-06 |

|                                       |                                       |                                       |          |
|---------------------------------------|---------------------------------------|---------------------------------------|----------|
| <i>miR-93/106b</i> cluster            | <i>miR-93/106b</i> cluster            | <i>miR-181a</i>                       | 7.18E-06 |
| <i>let-7e/miR-99b</i> cluster         | <i>miR-10b</i>                        | <i>miR-488</i>                        | 7.36E-06 |
| <i>miR-451a/451b/144/4732</i> cluster | <i>miR-10b</i>                        | <i>miR-708</i>                        | 7.44E-06 |
| <i>miR-9-1</i>                        | <i>miR-128b</i>                       | <i>miR-128b</i>                       | 7.73E-06 |
| <i>miR-128b</i>                       | <i>miR-708</i>                        | <i>miR-128b</i>                       | 7.73E-06 |
| <i>miR-132</i>                        | <i>miR-181a</i>                       | <i>let-7e/miR-99b</i> cluster         | 8.22E-06 |
| <i>miR-128b</i>                       | <i>miR-10b</i>                        | <i>miR-132</i>                        | 8.32E-06 |
| <i>let-7i</i>                         | <i>miR-196</i>                        | <i>let-7i</i>                         | 8.35E-06 |
| <i>let-7e/miR-99b</i> cluster         | <i>miR-429</i>                        | <i>miR-181c</i>                       | 8.52E-06 |
| <i>miR-132</i>                        | <i>miR-10b</i>                        | <i>miR-128b</i>                       | 8.52E-06 |
| <i>miR-128b</i>                       | <i>miR-31</i>                         | <i>miR-373</i>                        | 8.67E-06 |
| <i>let-7d</i>                         | <i>miR-451a/451b/144/4732</i> cluster | <i>miR-10b</i>                        | 8.69E-06 |
| <i>let-7d</i>                         | <i>miR-10b</i>                        | <i>miR-451a/451b/144/4732</i> cluster | 8.70E-06 |
| <i>miR-488</i>                        | <i>miR-10b</i>                        | <i>let-7e/miR-99b</i> cluster         | 8.70E-06 |
| <i>miR-181c</i>                       | <i>let-7i</i>                         | <i>miR-216</i>                        | 9.21E-06 |
| <i>miR-181c</i>                       | <i>miR-126</i>                        | <i>miR-126</i>                        | 9.53E-06 |
| <i>miR-181c</i>                       | <i>miR-24-2/27a/23a</i> cluster       | <i>miR-129-2</i>                      | 9.58E-06 |
| <i>miR-373</i>                        | <i>miR-373</i>                        | <i>miR-451a/451b/144/4732</i> cluster | 9.58E-06 |
| <i>miR-129-2</i>                      | <i>miR-181c</i>                       | <i>miR-24-2/27a/23a</i> cluster       | 9.61E-06 |
| <i>miR-128b</i>                       | <i>miR-132</i>                        | <i>miR-451a/451b/144/4732</i> cluster | 9.68E-06 |
| <i>miR-9-1</i>                        | <i>miR-10b</i>                        | <i>miR-376a</i>                       | 1.01E-05 |
| <i>miR-376a</i>                       | <i>miR-24-2/27a/23a</i> cluster       | <i>let-7i</i>                         | 1.01E-05 |
| <i>miR-132</i>                        | <i>miR-199b/3154</i> cluster          | <i>miR-181c</i>                       | 1.10E-05 |
| <i>miR-29a</i>                        | <i>miR-31</i>                         | <i>let-7e/miR-99b</i> cluster         | 1.12E-05 |
| <i>miR-34a</i>                        | <i>miR-34a</i>                        | <i>miR-31</i>                         | 1.13E-05 |
| <i>miR-128b</i>                       | <i>miR-128b</i>                       | <i>miR-708</i>                        | 1.13E-05 |
| <i>miR-376a</i>                       | <i>miR-15b/miR-16-2</i> cluster       | <i>let-7a</i>                         | 1.22E-05 |
| <i>let-7a</i>                         | <i>miR-376a</i>                       | <i>miR-132</i>                        | 1.26E-05 |
| <i>miR-376a</i>                       | <i>miR-24-2/27a/23a</i> cluster       | <i>miR-188</i>                        | 1.26E-05 |
| <i>miR-29c</i>                        | <i>miR-181c</i>                       | <i>miR-29c</i>                        | 1.30E-05 |
| <i>miR-128b</i>                       | <i>miR-10b</i>                        | <i>miR-324</i>                        | 1.30E-05 |
| <i>miR-199b/3154</i> cluster          | <i>miR-199b/3154</i> cluster          | <i>miR-31</i>                         | 1.30E-05 |
| <i>miR-181a</i>                       | <i>let-7i</i>                         | <i>miR-15b/miR-16-2</i> cluster       | 1.37E-05 |
| <i>miR-128b</i>                       | <i>miR-128b</i>                       | <i>let-7d</i>                         | 1.38E-05 |
| <i>miR-196</i>                        | <i>miR-451a/451b/144/4732</i> cluster | <i>miR-126</i>                        | 1.39E-05 |
| <i>miR-128b</i>                       | <i>miR-196</i>                        | <i>let-7i</i>                         | 1.43E-05 |
| <i>miR-128b</i>                       | <i>miR-373</i>                        | <i>miR-31</i>                         | 1.43E-05 |
| <i>miR-429</i>                        | <i>miR-451a/451b/144/4732</i> cluster | <i>miR-451a/451b/144/4732</i> cluster | 1.49E-05 |
| <i>miR-128b</i>                       | <i>miR-181c</i>                       | <i>miR-188</i>                        | 1.59E-05 |
| <i>let-7i</i>                         | <i>miR-216</i>                        | <i>miR-181c</i>                       | 1.62E-05 |
| <i>miR-10b</i>                        | <i>miR-10b</i>                        | <i>miR-708</i>                        | 1.64E-05 |
| <i>miR-29a</i>                        | <i>miR-29a</i>                        | <i>miR-29b</i>                        | 1.85E-05 |
| <i>let-7i</i>                         | <i>miR-126</i>                        | <i>miR-376a</i>                       | 1.85E-05 |
| <i>let-7i</i>                         | <i>miR-216</i>                        | <i>let-7i</i>                         | 1.85E-05 |
| <i>miR-29a</i>                        | <i>miR-324</i>                        | <i>miR-29a</i>                        | 1.89E-05 |
| <i>let-7d</i>                         | <i>miR-132</i>                        | <i>miR-181c</i>                       | 2.01E-05 |
| <i>miR-126</i>                        | <i>miR-196</i>                        | <i>miR-451a/451b/144/4732</i> cluster | 2.18E-05 |

|                             |                                       |                                 |          |
|-----------------------------|---------------------------------------|---------------------------------|----------|
|                             |                                       | cluster                         |          |
| <i>let-7a</i>               | <i>miR-489</i>                        | <i>miR-31</i>                   | 2.20E-05 |
| <i>miR-34a</i>              | <i>miR-15b/miR-16-2 cluster</i>       | <i>miR-376a</i>                 | 2.30E-05 |
| <i>miR-376a</i>             | <i>miR-211</i>                        | <i>miR-10b</i>                  | 2.30E-05 |
| <i>miR-29a</i>              | <i>miR-429</i>                        | <i>miR-181a</i>                 | 2.32E-05 |
| <i>miR-126</i>              | <i>miR-451a/451b/144/4732 cluster</i> | <i>miR-196</i>                  | 2.32E-05 |
| <i>miR-376a</i>             | <i>miR-488</i>                        | <i>miR-31</i>                   | 2.47E-05 |
| <i>miR-132</i>              | <i>miR-451a/451b/144/4732 cluster</i> | <i>miR-126</i>                  | 2.53E-05 |
| <i>miR-181a</i>             | <i>miR-429</i>                        | <i>miR-29a</i>                  | 2.56E-05 |
| <i>miR-376a</i>             | <i>miR-10b</i>                        | <i>miR-29b</i>                  | 2.71E-05 |
| <i>miR-29a</i>              | <i>let-7e/miR-99b cluster</i>         | <i>miR-31</i>                   | 2.71E-05 |
| <i>let-7a</i>               | <i>miR-31</i>                         | <i>miR-489</i>                  | 2.76E-05 |
| <i>let-7a</i>               | <i>let-7e/miR-99b cluster</i>         | <i>miR-29a</i>                  | 2.89E-05 |
| <i>miR-132</i>              | <i>miR-376a</i>                       | <i>let-7a</i>                   | 3.18E-05 |
| <i>miR-181a</i>             | <i>miR-376a</i>                       | <i>let-7i</i>                   | 3.40E-05 |
| <i>miR-29a</i>              | <i>let-7e/miR-99b cluster</i>         | <i>let-7a</i>                   | 3.45E-05 |
| <i>miR-31</i>               | <i>miR-199b/3154 cluster</i>          | <i>miR-199b/3154 cluster</i>    | 3.45E-05 |
| <i>miR-16-1/15a cluster</i> | <i>miR-99a</i>                        | <i>miR-16-1/15a cluster</i>     | 3.45E-05 |
| <i>let-7c</i>               | <i>let-7d</i>                         | <i>miR-324</i>                  | 4.06E-05 |
| <i>miR-16-1/15a cluster</i> | <i>miR-199b/3154 cluster</i>          | <i>miR-16-1/15a cluster</i>     | 4.14E-05 |
| <i>miR-181a</i>             | <i>miR-488</i>                        | <i>miR-376a</i>                 | 4.14E-05 |
| <i>miR-373</i>              | <i>miR-10b</i>                        | <i>miR-373</i>                  | 4.32E-05 |
| <i>miR-212</i>              | <i>miR-376a</i>                       | <i>miR-29b</i>                  | 4.33E-05 |
| <i>miR-324</i>              | <i>miR-10b</i>                        | <i>miR-128b</i>                 | 4.99E-05 |
| <i>let-7c</i>               | <i>miR-328</i>                        | <i>let-7c</i>                   | 5.32E-05 |
| <i>miR-181c</i>             | <i>miR-24-2/27a/23a cluster</i>       | <i>miR-29b</i>                  | 5.34E-05 |
| <i>miR-488</i>              | <i>miR-31</i>                         | <i>miR-376a</i>                 | 5.43E-05 |
| <i>miR-31</i>               | <i>miR-373</i>                        | <i>miR-128b</i>                 | 6.02E-05 |
| <i>miR-328</i>              | <i>miR-10b</i>                        | <i>miR-181a</i>                 | 6.02E-05 |
| <i>miR-132</i>              | <i>miR-181c</i>                       | <i>miR-199b/3154 cluster</i>    | 6.02E-05 |
| <i>miR-29b</i>              | <i>miR-24-2/27a/23a cluster</i>       | <i>miR-181c</i>                 | 6.09E-05 |
| <i>miR-16-1/15a cluster</i> | <i>miR-16-1/15a cluster</i>           | <i>miR-373</i>                  | 6.17E-05 |
| <i>let-7a</i>               | <i>miR-29a</i>                        | <i>let-7e/miR-99b cluster</i>   | 6.29E-05 |
| <i>miR-16-1/15a cluster</i> | <i>miR-16-1/15a cluster</i>           | <i>miR-99a</i>                  | 6.70E-05 |
| <i>miR-16-1/15a cluster</i> | <i>miR-488</i>                        | <i>miR-16-1/15a cluster</i>     | 6.70E-05 |
| <i>miR-132</i>              | <i>miR-132</i>                        | <i>miR-132</i>                  | 6.70E-05 |
| <i>miR-188</i>              | <i>miR-451a/451b/144/4732 cluster</i> | <i>miR-10b</i>                  | 6.80E-05 |
| <i>miR-376a</i>             | <i>miR-126</i>                        | <i>let-7i</i>                   | 7.06E-05 |
| <i>miR-132</i>              | <i>miR-451a/451b/144/4732 cluster</i> | <i>miR-128b</i>                 | 7.97E-05 |
| <i>miR-324</i>              | <i>miR-10b</i>                        | <i>miR-328</i>                  | 7.97E-05 |
| <i>miR-181a</i>             | <i>miR-24-2/27a/23a cluster</i>       | <i>miR-199b/3154 cluster</i>    | 9.98E-05 |
| <i>miR-324</i>              | <i>miR-328</i>                        | <i>miR-10b</i>                  | 1.01E-04 |
| <i>let-7c</i>               | <i>miR-181a</i>                       | <i>miR-15b/miR-16-2 cluster</i> | 1.05E-04 |
| <i>miR-376a</i>             | <i>miR-451a/451b/144/4732 cluster</i> | <i>let-7a</i>                   | 1.05E-04 |
| <i>miR-376a</i>             | <i>let-7i</i>                         | <i>miR-126</i>                  | 1.07E-04 |
| <i>miR-216</i>              | <i>miR-489</i>                        | <i>miR-181a</i>                 | 1.08E-04 |
| <i>miR-16-1/15a cluster</i> | <i>miR-373</i>                        | <i>miR-16-1/15a cluster</i>     | 1.09E-04 |
| <i>miR-29a</i>              | <i>miR-199b/3154 cluster</i>          | <i>miR-132</i>                  | 1.09E-04 |
| <i>miR-128b</i>             | <i>miR-324</i>                        | <i>miR-10b</i>                  | 1.09E-04 |

|                                       |                                       |                                       |          |
|---------------------------------------|---------------------------------------|---------------------------------------|----------|
| <i>miR-451a/451b/144/4732</i> cluster | <i>miR-489</i>                        | <i>miR-488</i>                        | 1.11E-04 |
| <i>let-7a</i>                         | <i>miR-132</i>                        | <i>miR-376a</i>                       | 1.11E-04 |
| <i>miR-128b</i>                       | <i>miR-216</i>                        | <i>miR-324</i>                        | 1.11E-04 |
| <i>miR-429</i>                        | <i>miR-451a/451b/144/4732</i> cluster | <i>miR-199b/3154</i> cluster          | 1.13E-04 |
| <i>miR-181a</i>                       | <i>miR-15b/miR-16-2</i> cluster       | <i>let-7c</i>                         | 1.14E-04 |
| <i>miR-328</i>                        | <i>miR-451a/451b/144/4732</i> cluster | <i>miR-34a</i>                        | 1.18E-04 |
| <i>miR-128b</i>                       | <i>miR-212</i>                        | <i>miR-451a/451b/144/4732</i> cluster | 1.20E-04 |
| <i>miR-181c</i>                       | <i>miR-373</i>                        | <i>miR-129-2</i>                      | 1.23E-04 |
| <i>miR-16-1/15a</i> cluster           | <i>miR-126</i>                        | <i>miR-216</i>                        | 1.27E-04 |
| <i>miR-181a</i>                       | <i>miR-376a</i>                       | <i>miR-373</i>                        | 1.32E-04 |
| <i>miR-181c</i>                       | <i>miR-199b/3154</i> cluster          | <i>miR-132</i>                        | 1.32E-04 |
| <i>miR-128b</i>                       | <i>miR-10b</i>                        | <i>let-7i</i>                         | 1.37E-04 |
| <i>let-7i</i>                         | <i>let-7i</i>                         | <i>miR-196</i>                        | 1.37E-04 |
| <i>miR-373</i>                        | <i>miR-451a/451b/144/4732</i> cluster | <i>miR-373</i>                        | 1.38E-04 |
| <i>miR-429</i>                        | <i>miR-451a/451b/144/4732</i> cluster | <i>miR-29b</i>                        | 1.38E-04 |
| <i>miR-132</i>                        | <i>miR-199b/3154</i> cluster          | <i>miR-29a</i>                        | 1.38E-04 |
| <i>miR-128b</i>                       | <i>miR-24-2/27a/23a</i> cluster       | <i>miR-128b</i>                       | 1.38E-04 |
| <i>miR-29a</i>                        | <i>miR-489</i>                        | <i>miR-489</i>                        | 1.39E-04 |
| <i>miR-34a</i>                        | <i>miR-328</i>                        | <i>miR-376a</i>                       | 1.46E-04 |
| <i>miR-128b</i>                       | <i>let-7i</i>                         | <i>miR-10b</i>                        | 1.46E-04 |
| <i>let-7i</i>                         | <i>let-7i</i>                         | <i>miR-99a</i>                        | 1.48E-04 |
| <i>miR-181a</i>                       | <i>miR-489</i>                        | <i>miR-216</i>                        | 1.50E-04 |
| <i>let-7d</i>                         | <i>miR-324</i>                        | <i>let-7c</i>                         | 1.51E-04 |
| <i>let-7a</i>                         | <i>miR-451a/451b/144/4732</i> cluster | <i>miR-376a</i>                       | 1.51E-04 |
| <i>miR-16-1/15a</i> cluster           | <i>miR-181c</i>                       | <i>miR-128b</i>                       | 1.53E-04 |
| <i>miR-9-1</i>                        | <i>miR-181c</i>                       | <i>miR-132</i>                        | 1.54E-04 |
| <i>let-7i</i>                         | <i>miR-10b</i>                        | <i>let-7c</i>                         | 1.54E-04 |
| <i>miR-324</i>                        | <i>miR-199b/3154</i> cluster          | <i>miR-181c</i>                       | 1.57E-04 |
| <i>miR-376a</i>                       | <i>miR-10b</i>                        | <i>miR-9-1</i>                        | 1.60E-04 |
| <i>miR-376a</i>                       | <i>miR-216</i>                        | <i>let-7i</i>                         | 1.65E-04 |
| <i>miR-29b</i>                        | <i>miR-376a</i>                       | <i>miR-212</i>                        | 1.73E-04 |
| <i>miR-129-2</i>                      | <i>miR-24-2/27a/23a</i> cluster       | <i>miR-181c</i>                       | 1.73E-04 |
| <i>miR-181c</i>                       | <i>miR-188</i>                        | <i>miR-128b</i>                       | 1.73E-04 |
| <i>miR-128b</i>                       | <i>miR-489</i>                        | <i>miR-489</i>                        | 1.73E-04 |
| <i>miR-324</i>                        | <i>miR-451a/451b/144/4732</i> cluster | <i>miR-429</i>                        | 1.81E-04 |
| <i>miR-126</i>                        | <i>miR-126</i>                        | <i>miR-181c</i>                       | 1.83E-04 |
| <i>let-7e/miR-99b</i> cluster         | <i>miR-31</i>                         | <i>miR-29a</i>                        | 1.87E-04 |
| <i>miR-29b</i>                        | <i>miR-451a/451b/144/4732</i> cluster | <i>miR-429</i>                        | 1.87E-04 |
| <i>miR-24-2/27a/23a</i> cluster       | <i>miR-24-2/27a/23a</i> cluster       | <i>miR-199b/3154</i> cluster          | 1.88E-04 |
| <i>miR-128b</i>                       | <i>miR-181c</i>                       | <i>miR-29a</i>                        | 1.93E-04 |
| <i>miR-211</i>                        | <i>miR-451a/451b/144/4732</i> cluster | <i>miR-373</i>                        | 1.96E-04 |
| <i>miR-16-1/15a</i> cluster           | <i>let-7e/miR-99b</i> cluster         | <i>miR-16-1/15a</i> cluster           | 2.00E-04 |
| <i>miR-181a</i>                       | <i>miR-376a</i>                       | <i>let-7c</i>                         | 2.05E-04 |
| <i>miR-29a</i>                        | <i>miR-15b/miR-16-2</i> cluster       | <i>miR-16-1/15a</i> cluster           | 2.12E-04 |

|                                       |                                       |                                       |          |
|---------------------------------------|---------------------------------------|---------------------------------------|----------|
| <i>miR-29c</i>                        | <i>miR-29c</i>                        | <i>miR-181c</i>                       | 2.13E-04 |
| <i>miR-489</i>                        | <i>miR-489</i>                        | <i>miR-489</i>                        | 2.18E-04 |
| <i>let-7e/miR-99b</i> cluster         | <i>miR-451a/451b/144/4732</i> cluster | <i>miR-324</i>                        | 2.20E-04 |
| <i>miR-188</i>                        | <i>miR-451a/451b/144/4732</i> cluster | <i>miR-181c</i>                       | 2.23E-04 |
| <i>miR-708</i>                        | <i>miR-10b</i>                        | <i>miR-10b</i>                        | 2.24E-04 |
| <i>miR-376a</i>                       | <i>miR-708</i>                        | <i>miR-451a/451b/144/4732</i> cluster | 2.26E-04 |
| <i>miR-181c</i>                       | <i>miR-188</i>                        | <i>miR-451a/451b/144/4732</i> cluster | 2.31E-04 |
| <i>miR-16-1/15a</i> cluster           | <i>miR-216</i>                        | <i>miR-126</i>                        | 2.33E-04 |
| <i>miR-34a</i>                        | <i>miR-376a</i>                       | <i>miR-15b/miR-16-2</i> cluster       | 2.33E-04 |
| <i>let-7d</i>                         | <i>miR-128b</i>                       | <i>miR-128b</i>                       | 2.46E-04 |
| <i>miR-126</i>                        | <i>miR-216</i>                        | <i>miR-16-1/15a</i> cluster           | 2.50E-04 |
| <i>miR-212</i>                        | <i>miR-216</i>                        | <i>miR-181a</i>                       | 2.54E-04 |
| <i>miR-29c</i>                        | <i>let-7i</i>                         | <i>miR-451a/451b/144/4732</i> cluster | 2.59E-04 |
| <i>let-7e/miR-99b</i> cluster         | <i>miR-181c</i>                       | <i>miR-429</i>                        | 2.59E-04 |
| <i>miR-212</i>                        | <i>miR-451a/451b/144/4732</i> cluster | <i>miR-128b</i>                       | 2.65E-04 |
| <i>miR-324</i>                        | <i>miR-451a/451b/144/4732</i> cluster | <i>miR-212</i>                        | 2.71E-04 |
| <i>miR-211</i>                        | <i>miR-373</i>                        | <i>miR-451a/451b/144/4732</i> cluster | 2.73E-04 |
| <i>miR-376a</i>                       | <i>miR-15b/miR-16-2</i> cluster       | <i>miR-34a</i>                        | 2.76E-04 |
| <i>miR-24-2/27a/23a</i> cluster       | <i>miR-199b/3154</i> cluster          | <i>miR-181a</i>                       | 2.77E-04 |
| <i>let-7a</i>                         | <i>miR-376a</i>                       | <i>miR-15b/miR-16-2</i> cluster       | 2.89E-04 |
| <i>miR-15b/miR-16-2</i> cluster       | <i>miR-15b/miR-16-2</i> cluster       | <i>miR-199b/3154</i> cluster          | 2.89E-04 |
| <i>miR-15b/miR-16-2</i> cluster       | <i>miR-199b/3154</i> cluster          | <i>miR-15b/miR-16-2</i> cluster       | 2.89E-04 |
| <i>miR-132</i>                        | <i>miR-212</i>                        | <i>miR-451a/451b/144/4732</i> cluster | 2.91E-04 |
| <i>miR-99a</i>                        | <i>let-7i</i>                         | <i>let-7i</i>                         | 2.91E-04 |
| <i>let-7i</i>                         | <i>miR-15b/miR-16-2</i> cluster       | <i>let-7c</i>                         | 3.00E-04 |
| <i>miR-9-1</i>                        | <i>miR-132</i>                        | <i>miR-181c</i>                       | 3.01E-04 |
| <i>miR-188</i>                        | <i>miR-31</i>                         | <i>miR-15b/miR-16-2</i> cluster       | 3.01E-04 |
| <i>miR-128b</i>                       | <i>miR-24-2/27a/23a</i> cluster       | <i>miR-24-2/27a/23a</i> cluster       | 3.12E-04 |
| <i>miR-15b/miR-16-2</i> cluster       | <i>miR-451a/451b/144/4732</i> cluster | <i>let-7e/miR-99b</i> cluster         | 3.13E-04 |
| <i>miR-188</i>                        | <i>miR-376a</i>                       | <i>miR-24-2/27a/23a</i> cluster       | 3.19E-04 |
| <i>miR-181a</i>                       | <i>miR-196</i>                        | <i>miR-10b</i>                        | 3.21E-04 |
| <i>miR-451a/451b/144/4732</i> cluster | <i>miR-451a/451b/144/4732</i> cluster | <i>miR-429</i>                        | 3.22E-04 |
| <i>miR-29a</i>                        | <i>miR-451a/451b/144/4732</i> cluster | <i>miR-9-1</i>                        | 3.34E-04 |
| <i>miR-126</i>                        | <i>miR-10b</i>                        | <i>miR-10b</i>                        | 3.37E-04 |
| <i>let-7c</i>                         | <i>miR-324</i>                        | <i>let-7d</i>                         | 3.39E-04 |
| <i>miR-181c</i>                       | <i>miR-328</i>                        | <i>miR-199b/3154</i> cluster          | 3.40E-04 |
| <i>let-7c</i>                         | <i>miR-451a/451b/144/4732</i> cluster | <i>miR-324</i>                        | 3.53E-04 |
| <i>miR-216</i>                        | <i>miR-451a/451b/144/4732</i> cluster | <i>miR-16-1/15a</i> cluster           | 3.67E-04 |
| <i>miR-128b</i>                       | <i>miR-128b</i>                       | <i>miR-9-1</i>                        | 3.68E-04 |
| <i>miR-16-1/15a</i> cluster           | <i>miR-128b</i>                       | <i>miR-181c</i>                       | 3.70E-04 |



|                                 |                                       |                                       |          |
|---------------------------------|---------------------------------------|---------------------------------------|----------|
| <i>miR-15b/miR-16-2 cluster</i> | <i>miR-10b</i>                        | <i>miR-128b</i>                       | 3.78E-04 |
| <i>miR-29b</i>                  | <i>miR-429</i>                        | <i>miR-451a/451b/144/4732 cluster</i> | 3.85E-04 |
| <i>miR-128b</i>                 | <i>miR-212</i>                        | <i>let-7e/miR-99b cluster</i>         | 4.04E-04 |
| <i>miR-211</i>                  | <i>miR-10b</i>                        | <i>miR-376a</i>                       | 4.16E-04 |
| <i>miR-15b/miR-16-2 cluster</i> | <i>miR-31</i>                         | <i>miR-188</i>                        | 4.21E-04 |
| <i>let-7a</i>                   | <i>miR-376a</i>                       | <i>miR-24-2/27a/23a cluster</i>       | 4.24E-04 |
| <i>miR-9-1</i>                  | <i>miR-29a</i>                        | <i>miR-451a/451b/144/4732 cluster</i> | 4.31E-04 |
| <i>miR-34a</i>                  | <i>miR-376a</i>                       | <i>miR-328</i>                        | 4.42E-04 |
| <i>miR-132</i>                  | <i>miR-15b/miR-16-2 cluster</i>       | <i>let-7i</i>                         | 4.47E-04 |
| <i>miR-708</i>                  | <i>miR-31</i>                         | <i>miR-128b</i>                       | 4.64E-04 |
| <i>miR-132</i>                  | <i>let-7i</i>                         | <i>miR-15b/miR-16-2 cluster</i>       | 4.69E-04 |
| <i>miR-34a</i>                  | <i>miR-31</i>                         | <i>miR-376a</i>                       | 4.86E-04 |
| <i>miR-376a</i>                 | <i>miR-488</i>                        | <i>miR-181a</i>                       | 5.18E-04 |
| <i>miR-488</i>                  | <i>miR-489</i>                        | <i>miR-451a/451b/144/4732 cluster</i> | 5.25E-04 |
| <i>miR-132</i>                  | <i>miR-181c</i>                       | <i>miR-9-1</i>                        | 5.26E-04 |
| <i>miR-16-1/15a cluster</i>     | <i>miR-29a</i>                        | <i>miR-429</i>                        | 5.39E-04 |
| <i>miR-373</i>                  | <i>miR-373</i>                        | <i>miR-29b</i>                        | 5.39E-04 |
| <i>miR-489</i>                  | <i>miR-489</i>                        | <i>miR-128b</i>                       | 5.39E-04 |
| <i>miR-93/106b cluster</i>      | <i>miR-181a</i>                       | <i>miR-93/106b cluster</i>            | 5.43E-04 |
| <i>miR-16-1/15a cluster</i>     | <i>miR-29a</i>                        | <i>miR-15b/miR-16-2 cluster</i>       | 5.49E-04 |
| <i>let-7a</i>                   | <i>miR-376a</i>                       | <i>miR-451a/451b/144/4732 cluster</i> | 5.53E-04 |
| <i>miR-31</i>                   | <i>miR-31</i>                         | <i>miR-324</i>                        | 5.53E-04 |
| <i>miR-181c</i>                 | <i>let-7i</i>                         | <i>miR-429</i>                        | 5.56E-04 |
| <i>miR-324</i>                  | <i>miR-216</i>                        | <i>miR-128b</i>                       | 5.58E-04 |
| <i>miR-328</i>                  | <i>miR-429</i>                        | <i>miR-376a</i>                       | 5.58E-04 |
| <i>miR-181a</i>                 | <i>miR-328</i>                        | <i>miR-451a/451b/144/4732 cluster</i> | 5.71E-04 |
| <i>miR-488</i>                  | <i>let-7i</i>                         | <i>miR-181a</i>                       | 5.74E-04 |
| <i>miR-128b</i>                 | <i>miR-128b</i>                       | <i>let-7i</i>                         | 5.74E-04 |
| <i>miR-9-1</i>                  | <i>miR-451a/451b/144/4732 cluster</i> | <i>miR-29a</i>                        | 5.75E-04 |
| <i>let-7e/miR-99b cluster</i>   | <i>miR-324</i>                        | <i>miR-451a/451b/144/4732 cluster</i> | 5.75E-04 |
| <i>miR-376a</i>                 | <i>miR-489</i>                        | <i>let-7a</i>                         | 5.80E-04 |
| <i>miR-29b</i>                  | <i>miR-212</i>                        | <i>miR-376a</i>                       | 5.87E-04 |
| <i>miR-132</i>                  | <i>miR-10b</i>                        | <i>miR-181c</i>                       | 5.87E-04 |
| <i>miR-373</i>                  | <i>miR-451a/451b/144/4732 cluster</i> | <i>miR-211</i>                        | 5.87E-04 |
| <i>miR-181a</i>                 | <i>miR-328</i>                        | <i>miR-10b</i>                        | 5.93E-04 |
| <i>miR-16-1/15a cluster</i>     | <i>miR-216</i>                        | <i>miR-451a/451b/144/4732 cluster</i> | 5.98E-04 |
| <i>let-7d</i>                   | <i>let-7d</i>                         | <i>miR-29a</i>                        | 5.99E-04 |
| <i>miR-34a</i>                  | <i>miR-376a</i>                       | <i>let-7b/miR-4763 cluster</i>        | 6.00E-04 |
| <i>miR-29a</i>                  | <i>miR-216</i>                        | <i>miR-29a</i>                        | 6.14E-04 |
| <i>miR-708</i>                  | <i>miR-31</i>                         | <i>miR-211</i>                        | 6.18E-04 |
| <i>let-7i</i>                   | <i>miR-15b/miR-16-2 cluster</i>       | <i>miR-132</i>                        | 6.36E-04 |
| <i>miR-376a</i>                 | <i>miR-429</i>                        | <i>miR-328</i>                        | 6.47E-04 |
| <i>miR-31</i>                   | <i>miR-211</i>                        | <i>miR-708</i>                        | 6.61E-04 |
| <i>miR-16-1/15a cluster</i>     | <i>miR-181c</i>                       | <i>miR-10b</i>                        | 6.72E-04 |
| <i>miR-128b</i>                 | <i>miR-199b/3154 cluster</i>          | <i>miR-128b</i>                       | 6.80E-04 |



|                                 |                                       |                                       |          |
|---------------------------------|---------------------------------------|---------------------------------------|----------|
| <i>miR-376a</i>                 | <i>let-7i</i>                         | <i>miR-216</i>                        | 7.02E-04 |
| <i>miR-324</i>                  | <i>miR-31</i>                         | <i>miR-31</i>                         | 7.26E-04 |
| <i>miR-31</i>                   | <i>miR-31</i>                         | <i>miR-99a</i>                        | 7.31E-04 |
| <i>miR-29a</i>                  | <i>miR-10b</i>                        | <i>miR-132</i>                        | 7.42E-04 |
| <i>miR-29a</i>                  | <i>miR-328</i>                        | <i>miR-15b/miR-16-2 cluster</i>       | 7.46E-04 |
| <i>miR-181c</i>                 | <i>let-7i</i>                         | <i>miR-29c</i>                        | 7.56E-04 |
| <i>miR-188</i>                  | <i>miR-24-2/27a/23a cluster</i>       | <i>miR-376a</i>                       | 7.56E-04 |
| <i>let-7e/miR-99b cluster</i>   | <i>miR-376a</i>                       | <i>miR-324</i>                        | 7.61E-04 |
| <i>miR-29b</i>                  | <i>miR-181c</i>                       | <i>miR-24-2/27a/23a cluster</i>       | 7.78E-04 |
| <i>miR-128b</i>                 | <i>miR-324</i>                        | <i>miR-216</i>                        | 7.90E-04 |
| <i>let-7b/miR-4763 cluster</i>  | <i>miR-34a</i>                        | <i>miR-376a</i>                       | 8.00E-04 |
| <i>let-7i</i>                   | <i>miR-216</i>                        | <i>miR-376a</i>                       | 8.04E-04 |
| <i>miR-34a</i>                  | <i>miR-328</i>                        | <i>miR-451a/451b/144/4732 cluster</i> | 8.19E-04 |
| <i>miR-181c</i>                 | <i>miR-199b/3154 cluster</i>          | <i>miR-212</i>                        | 8.24E-04 |
| <i>miR-181a</i>                 | <i>miR-376a</i>                       | <i>let-7d</i>                         | 8.36E-04 |
| <i>let-7i</i>                   | <i>miR-429</i>                        | <i>miR-181c</i>                       | 8.63E-04 |
| <i>miR-29a</i>                  | <i>miR-199b/3154 cluster</i>          | <i>let-7a</i>                         | 8.65E-04 |
| <i>let-7b/miR-4763 cluster</i>  | <i>miR-451a/451b/144/4732 cluster</i> | <i>miR-31</i>                         | 8.76E-04 |
| <i>miR-128b</i>                 | <i>miR-10b</i>                        | <i>miR-15b/miR-16-2 cluster</i>       | 8.76E-04 |
| <i>let-7c</i>                   | <i>miR-16-1/15a cluster</i>           | <i>miR-31</i>                         | 8.96E-04 |
| <i>miR-212</i>                  | <i>miR-376a</i>                       | <i>miR-24-2/27a/23a cluster</i>       | 9.07E-04 |
| <i>miR-16-1/15a cluster</i>     | <i>miR-429</i>                        | <i>miR-29a</i>                        | 9.14E-04 |
| <i>let-7c</i>                   | <i>miR-128b</i>                       | <i>let-7c</i>                         | 9.18E-04 |
| <i>miR-181a</i>                 | <i>miR-31</i>                         | <i>miR-29a</i>                        | 9.18E-04 |
| <i>let-7b/miR-4763 cluster</i>  | <i>miR-376a</i>                       | <i>miR-34a</i>                        | 9.23E-04 |
| <i>miR-324</i>                  | <i>miR-324</i>                        | <i>miR-93/106b cluster</i>            | 9.55E-04 |
| <i>miR-376a</i>                 | <i>miR-429</i>                        | <i>let-7c</i>                         | 9.63E-04 |
| <i>miR-181c</i>                 | <i>miR-199b/3154 cluster</i>          | <i>miR-324</i>                        | 9.70E-04 |
| <i>miR-29a</i>                  | <i>miR-429</i>                        | <i>miR-16-1/15a cluster</i>           | 9.73E-04 |
| <i>miR-128b</i>                 | <i>miR-181c</i>                       | <i>miR-708</i>                        | 9.73E-04 |
| <i>miR-181a</i>                 | <i>miR-376a</i>                       | <i>miR-16-1/15a cluster</i>           | 9.76E-04 |
| <i>miR-373</i>                  | <i>miR-373</i>                        | <i>miR-10b</i>                        | 9.86E-04 |
| <i>let-7e/miR-99b cluster</i>   | <i>miR-373</i>                        | <i>let-7e/miR-99b cluster</i>         | 9.94E-04 |
| <i>let-7c</i>                   | <i>miR-15b/miR-16-2 cluster</i>       | <i>miR-181a</i>                       | 9.95E-04 |
| <i>let-7e/miR-99b cluster</i>   | <i>miR-181c</i>                       | <i>miR-24-2/27a/23a cluster</i>       | 1.01E-03 |
| <i>miR-29a</i>                  | <i>miR-29a</i>                        | <i>miR-328</i>                        | 1.04E-03 |
| <i>miR-181c</i>                 | <i>let-7i</i>                         | <i>let-7a</i>                         | 1.05E-03 |
| <i>miR-488</i>                  | <i>miR-451a/451b/144/4732 cluster</i> | <i>miR-489</i>                        | 1.05E-03 |
| <i>miR-29c</i>                  | <i>miR-181c</i>                       | <i>let-7i</i>                         | 1.06E-03 |
| <i>miR-196</i>                  | <i>miR-451a/451b/144/4732 cluster</i> | <i>let-7d</i>                         | 1.06E-03 |
| <i>miR-34a</i>                  | <i>miR-376a</i>                       | <i>miR-31</i>                         | 1.07E-03 |
| <i>miR-376a</i>                 | <i>miR-31</i>                         | <i>miR-488</i>                        | 1.07E-03 |
| <i>miR-128b</i>                 | <i>miR-211</i>                        | <i>miR-211</i>                        | 1.08E-03 |
| <i>miR-15b/miR-16-2 cluster</i> | <i>miR-15b/miR-16-2 cluster</i>       | <i>miR-9-1</i>                        | 1.08E-03 |
| <i>miR-181c</i>                 | <i>miR-10b</i>                        | <i>miR-132</i>                        | 1.08E-03 |
| <i>let-7c</i>                   | <i>miR-10b</i>                        | <i>let-7i</i>                         | 1.08E-03 |
| <i>miR-29a</i>                  | <i>miR-29b</i>                        | <i>miR-29a</i>                        | 1.13E-03 |
| <i>miR-708</i>                  | <i>miR-211</i>                        | <i>miR-31</i>                         | 1.13E-03 |
| <i>miR-188</i>                  | <i>miR-15b/miR-16-2 cluster</i>       | <i>miR-31</i>                         | 1.14E-03 |
| <i>miR-489</i>                  | <i>miR-489</i>                        | <i>miR-29a</i>                        | 1.16E-03 |

|                                       |                                       |                                       |          |
|---------------------------------------|---------------------------------------|---------------------------------------|----------|
| <i>miR-199b/3154</i> cluster          | <i>miR-429</i>                        | <i>miR-451a/451b/144/4732</i> cluster | 1.17E-03 |
| <i>let-7c</i>                         | <i>miR-429</i>                        | <i>miR-376a</i>                       | 1.18E-03 |
| <i>miR-16-1/15a</i> cluster           | <i>miR-15b/miR-16-2</i> cluster       | <i>miR-29a</i>                        | 1.18E-03 |
| <i>miR-29a</i>                        | <i>miR-451a/451b/144/4732</i> cluster | <i>let-7d</i>                         | 1.18E-03 |
| <i>miR-132</i>                        | <i>miR-188</i>                        | <i>miR-181a</i>                       | 1.18E-03 |
| <i>miR-376a</i>                       | <i>miR-211</i>                        | <i>miR-24-2/27a/23a</i> cluster       | 1.18E-03 |
| <i>miR-128b</i>                       | <i>miR-15b/miR-16-2</i> cluster       | <i>miR-10b</i>                        | 1.19E-03 |
| <i>miR-181a</i>                       | <i>miR-216</i>                        | <i>miR-489</i>                        | 1.19E-03 |
| <i>let-7a</i>                         | <i>miR-199b/3154</i> cluster          | <i>miR-29a</i>                        | 1.21E-03 |
| <i>miR-199b/3154</i> cluster          | <i>miR-451a/451b/144/4732</i> cluster | <i>miR-429</i>                        | 1.23E-03 |
| <i>let-7c</i>                         | <i>miR-324</i>                        | <i>miR-10b</i>                        | 1.26E-03 |
| <i>miR-16-1/15a</i> cluster           | <i>miR-181c</i>                       | <i>miR-373</i>                        | 1.26E-03 |
| <i>miR-16-1/15a</i> cluster           | <i>miR-129-2</i>                      | <i>miR-376a</i>                       | 1.32E-03 |
| <i>let-7i</i>                         | <i>miR-10b</i>                        | <i>miR-128b</i>                       | 1.32E-03 |
| <i>miR-132</i>                        | <i>miR-212</i>                        | <i>miR-181a</i>                       | 1.33E-03 |
| <i>miR-376a</i>                       | <i>miR-211</i>                        | <i>miR-128b</i>                       | 1.33E-03 |
| <i>let-7a</i>                         | <i>let-7a</i>                         | <i>miR-24-2/27a/23a</i> cluster       | 1.35E-03 |
| <i>miR-29a</i>                        | <i>miR-31</i>                         | <i>let-7a</i>                         | 1.36E-03 |
| <i>miR-181a</i>                       | <i>miR-451a/451b/144/4732</i> cluster | <i>miR-328</i>                        | 1.38E-03 |
| <i>miR-196</i>                        | <i>miR-196</i>                        | <i>miR-376a</i>                       | 1.38E-03 |
| <i>miR-15b/miR-16-2</i> cluster       | <i>miR-199b/3154</i> cluster          | <i>miR-199b/3154</i> cluster          | 1.40E-03 |
| <i>let-7c</i>                         | <i>miR-15b/miR-16-2</i> cluster       | <i>let-7i</i>                         | 1.42E-03 |
| <i>miR-9-1</i>                        | <i>miR-181c</i>                       | <i>miR-93/106b</i> cluster            | 1.43E-03 |
| <i>miR-16-1/15a</i> cluster           | <i>miR-451a/451b/144/4732</i> cluster | <i>miR-216</i>                        | 1.43E-03 |
| <i>miR-132</i>                        | <i>miR-181c</i>                       | <i>miR-10b</i>                        | 1.45E-03 |
| <i>miR-16-1/15a</i> cluster           | <i>miR-24-2/27a/23a</i> cluster       | <i>miR-181c</i>                       | 1.48E-03 |
| <i>let-7c</i>                         | <i>let-7e/miR-99b</i> cluster         | <i>miR-376a</i>                       | 1.49E-03 |
| <i>miR-129-2</i>                      | <i>miR-376a</i>                       | <i>miR-16-1/15a</i> cluster           | 1.49E-03 |
| <i>miR-199b/3154</i> cluster          | <i>miR-328</i>                        | <i>miR-181c</i>                       | 1.49E-03 |
| <i>miR-181a</i>                       | <i>miR-10b</i>                        | <i>miR-196</i>                        | 1.53E-03 |
| <i>miR-212</i>                        | <i>miR-324</i>                        | <i>miR-181a</i>                       | 1.53E-03 |
| <i>miR-128b</i>                       | <i>miR-31</i>                         | <i>miR-708</i>                        | 1.57E-03 |
| <i>miR-29a</i>                        | <i>miR-132</i>                        | <i>miR-199b/3154</i> cluster          | 1.57E-03 |
| <i>let-7i</i>                         | <i>miR-328</i>                        | <i>miR-181a</i>                       | 1.57E-03 |
| <i>miR-181c</i>                       | <i>miR-324</i>                        | <i>miR-199b/3154</i> cluster          | 1.58E-03 |
| <i>miR-212</i>                        | <i>miR-376a</i>                       | <i>miR-99a</i>                        | 1.58E-03 |
| <i>miR-324</i>                        | <i>miR-376a</i>                       | <i>miR-211</i>                        | 1.58E-03 |
| <i>miR-451a/451b/144/4732</i> cluster | <i>miR-10b</i>                        | <i>miR-188</i>                        | 1.58E-03 |
| <i>miR-16-1/15a</i> cluster           | <i>miR-16-1/15a</i> cluster           | <i>let-7e/miR-99b</i> cluster         | 1.59E-03 |
| <i>miR-99a</i>                        | <i>miR-31</i>                         | <i>miR-31</i>                         | 1.59E-03 |
| <i>let-7c</i>                         | <i>let-7c</i>                         | <i>miR-429</i>                        | 1.61E-03 |
| <i>miR-16-1/15a</i> cluster           | <i>miR-328</i>                        | <i>miR-451a/451b/144/4732</i> cluster | 1.63E-03 |
| <i>miR-212</i>                        | <i>miR-31</i>                         | <i>miR-31</i>                         | 1.65E-03 |
| <i>let-7c</i>                         | <i>miR-324</i>                        | <i>miR-451a/451b/144/4732</i> cluster | 1.69E-03 |
| <i>let-7a</i>                         | <i>miR-29a</i>                        | <i>miR-31</i>                         | 1.70E-03 |
| <i>let-7a</i>                         | <i>miR-324</i>                        | <i>miR-376a</i>                       | 1.71E-03 |

|                                 |                                       |                                       |          |
|---------------------------------|---------------------------------------|---------------------------------------|----------|
| <i>miR-24-2/27a/23a</i> cluster | <i>miR-31</i>                         | <i>miR-128b</i>                       | 1.71E-03 |
| <i>miR-376a</i>                 | <i>miR-489</i>                        | <i>miR-451a/451b/144/4732</i> cluster | 1.72E-03 |
| <i>let-7a</i>                   | <i>miR-489</i>                        | <i>miR-376a</i>                       | 1.76E-03 |
| <i>miR-29a</i>                  | <i>miR-29a</i>                        | <i>miR-324</i>                        | 1.76E-03 |
| <i>miR-181a</i>                 | <i>miR-324</i>                        | <i>miR-212</i>                        | 1.76E-03 |
| <i>miR-376a</i>                 | <i>miR-451a/451b/144/4732</i> cluster | <i>miR-93/106b</i> cluster            | 1.76E-03 |
| <i>miR-128b</i>                 | <i>miR-128b</i>                       | <i>miR-24-2/27a/23a</i> cluster       | 1.79E-03 |
| <i>miR-181a</i>                 | <i>miR-10b</i>                        | <i>miR-328</i>                        | 1.79E-03 |
| <i>let-7c</i>                   | <i>miR-126</i>                        | <i>miR-181c</i>                       | 1.89E-03 |
| <i>miR-128b</i>                 | <i>miR-376a</i>                       | <i>miR-211</i>                        | 1.90E-03 |
| <i>miR-199b/3154</i> cluster    | <i>miR-199b/3154</i> cluster          | <i>miR-15b/miR-16-2</i> cluster       | 1.91E-03 |
| <i>miR-181a</i>                 | <i>miR-188</i>                        | <i>miR-188</i>                        | 1.92E-03 |
| <i>let-7e/miR-99b</i> cluster   | <i>miR-212</i>                        | <i>miR-128b</i>                       | 1.92E-03 |
| <i>miR-129-2</i>                | <i>miR-181c</i>                       | <i>miR-373</i>                        | 1.92E-03 |
| <i>miR-15b/miR-16-2</i> cluster | <i>miR-15b/miR-16-2</i> cluster       | <i>miR-212</i>                        | 1.94E-03 |
| <i>let-7a</i>                   | <i>miR-181c</i>                       | <i>let-7i</i>                         | 1.95E-03 |
| <i>miR-181c</i>                 | <i>miR-15b/miR-16-2</i> cluster       | <i>miR-29c</i>                        | 1.95E-03 |
| <i>miR-181c</i>                 | <i>miR-489</i>                        | <i>miR-24-2/27a/23a</i> cluster       | 1.97E-03 |
| <i>miR-181a</i>                 | <i>miR-199b/3154</i> cluster          | <i>miR-24-2/27a/23a</i> cluster       | 1.99E-03 |
| <i>let-7d</i>                   | <i>miR-708</i>                        | <i>miR-451a/451b/144/4732</i> cluster | 1.99E-03 |

### Supplementary Table 13 Constructs Used in This Work

| Construct ID | Design                                                                                                                  |
|--------------|-------------------------------------------------------------------------------------------------------------------------|
| pAWp6        | pFUGW-UBCp- <i>GFP</i>                                                                                                  |
| pAWp12       | pFUGW-CMVp- <i>GFP</i>                                                                                                  |
| pAWp7        | pFUGW-UBCp- <i>RFP</i> -CMVp- <i>GFP</i>                                                                                |
| pAWp7-1      | pFUGW-UBCp- <i>RFP</i> -CMVp- <i>GFP</i> -[ <i>miR-124</i> ]                                                            |
| pAWp7-2      | pFUGW-UBCp- <i>RFP</i> -CMVp- <i>GFP</i> -[ <i>miR-128</i> ]                                                            |
| pAWp7-3      | pFUGW-UBCp- <i>RFP</i> -CMVp- <i>GFP</i> -[ <i>miR-132</i> ]                                                            |
| pAWp7-4      | pFUGW-UBCp- <i>RFP</i> -CMVp- <i>GFP</i> -[ <i>miR-124</i> + <i>miR-128</i> ]                                           |
| pAWp7-5      | pFUGW-UBCp- <i>RFP</i> -CMVp- <i>GFP</i> -[ <i>miR-128</i> + <i>miR-132</i> ]                                           |
| pAWp7-6      | pFUGW-UBCp- <i>RFP</i> -CMVp- <i>GFP</i> -[ <i>miR-124</i> + <i>miR-128</i> + <i>miR-132</i> ]                          |
| pAWp7-7      | pFUGW-UBCp- <i>RFP</i> -[ <i>miR-124</i> sensor]-CMVp- <i>GFP</i>                                                       |
| pAWp7-8      | pFUGW-UBCp- <i>RFP</i> -[ <i>miR-128</i> sensor]-CMVp- <i>GFP</i>                                                       |
| pAWp7-9      | pFUGW-UBCp- <i>RFP</i> -[ <i>miR-132</i> sensor]-CMVp- <i>GFP</i>                                                       |
| pAWp7-10     | pFUGW-UBCp- <i>RFP</i> -[ <i>miR-124</i> sensor]-CMVp- <i>GFP</i> -[ <i>miR-124</i> ]                                   |
| pAWp7-11     | pFUGW-UBCp- <i>RFP</i> -[ <i>miR-128</i> sensor]-CMVp- <i>GFP</i> -[ <i>miR-124</i> ]                                   |
| pAWp7-12     | pFUGW-UBCp- <i>RFP</i> -[ <i>miR-132</i> sensor]-CMVp- <i>GFP</i> -[ <i>miR-124</i> ]                                   |
| pAWp7-13     | pFUGW-UBCp- <i>RFP</i> -[ <i>miR-124</i> sensor]-CMVp- <i>GFP</i> -[ <i>miR-128</i> ]                                   |
| pAWp7-14     | pFUGW-UBCp- <i>RFP</i> -[ <i>miR-128</i> sensor]-CMVp- <i>GFP</i> -[ <i>miR-128</i> ]                                   |
| pAWp7-15     | pFUGW-UBCp- <i>RFP</i> -[ <i>miR-132</i> sensor]-CMVp- <i>GFP</i> -[ <i>miR-128</i> ]                                   |
| pAWp7-16     | pFUGW-UBCp- <i>RFP</i> -[ <i>miR-124</i> sensor]-CMVp- <i>GFP</i> -[ <i>miR-132</i> ]                                   |
| pAWp7-17     | pFUGW-UBCp- <i>RFP</i> -[ <i>miR-128</i> sensor]-CMVp- <i>GFP</i> -[ <i>miR-132</i> ]                                   |
| pAWp7-18     | pFUGW-UBCp- <i>RFP</i> -[ <i>miR-132</i> sensor]-CMVp- <i>GFP</i> -[ <i>miR-132</i> ]                                   |
| pAWp7-19     | pFUGW-UBCp- <i>RFP</i> -[ <i>miR-124</i> sensor]-CMVp- <i>GFP</i> -[ <i>miR-124</i> + <i>miR-128</i> ]                  |
| pAWp7-20     | pFUGW-UBCp- <i>RFP</i> -[ <i>miR-128</i> sensor]-CMVp- <i>GFP</i> -[ <i>miR-128</i> + <i>miR-132</i> ]                  |
| pAWp7-21     | pFUGW-UBCp- <i>RFP</i> -[ <i>miR-132</i> sensor]-CMVp- <i>GFP</i> -[ <i>miR-124</i> + <i>miR-128</i> + <i>miR-132</i> ] |
| pAWSV-1      | pBT264-[ <i>let-7a</i> ]                                                                                                |
| pAWSV-2      | pBT264-[ <i>let-7b/miR-4763</i> cluster]                                                                                |
| pAWSV-3      | pBT264-[ <i>let-7c</i> ]                                                                                                |
| pAWSV-4      | pBT264-[ <i>let-7d</i> ]                                                                                                |
| pAWSV-5      | pBT264-[ <i>let-7e/miR-99b</i> cluster]                                                                                 |
| pAWSV-6      | pBT264-[ <i>let-7i</i> ]                                                                                                |
| pAWSV-7      | pBT264-[ <i>miR-10b</i> ]                                                                                               |
| pAWSV-8      | pBT264-[ <i>miR-126</i> ]                                                                                               |
| pAWSV-9      | pBT264-[ <i>miR-128b</i> ]                                                                                              |
| pAWSV-10     | pBT264-[ <i>miR-129-2</i> ]                                                                                             |
| pAWSV-11     | pBT264-[ <i>miR-132</i> ]                                                                                               |
| pAWSV-12     | pBT264-[ <i>miR-15b/16-2</i> cluster]                                                                                   |
| pAWSV-13     | pBT264-[ <i>miR-16-1/15a</i> cluster]                                                                                   |
| pAWSV-14     | pBT264-[ <i>miR-181a</i> ]                                                                                              |
| pAWSV-15     | pBT264-[ <i>miR-181c</i> ]                                                                                              |
| pAWSV-16     | pBT264-[ <i>miR-188</i> ]                                                                                               |
| pAWSV-17     | pBT264-[ <i>miR-196</i> ]                                                                                               |
| pAWSV-18     | pBT264-[ <i>miR-199b/3154</i> cluster]                                                                                  |
| pAWSV-19     | pBT264-[ <i>miR-211</i> ]                                                                                               |
| pAWSV-20     | pBT264-[ <i>miR-212</i> ]                                                                                               |
| pAWSV-21     | pBT264-[ <i>miR-216</i> ]                                                                                               |
| pAWSV-22     | pBT264-[ <i>miR-24-2/27a/23a</i> cluster]                                                                               |
| pAWSV-23     | pBT264-[ <i>miR-29a</i> ]                                                                                               |
| pAWSV-24     | pBT264-[ <i>miR-29b</i> ]                                                                                               |
| pAWSV-25     | pBT264-[ <i>miR-29c</i> ]                                                                                               |
| pAWSV-26     | pBT264-[ <i>miR-31</i> ]                                                                                                |

|           |                                                                                                         |
|-----------|---------------------------------------------------------------------------------------------------------|
| pAWSV-27  | pBT264-[ <i>miR-324</i> ]                                                                               |
| pAWSV-28  | pBT264-[ <i>miR-328</i> ]                                                                               |
| pAWSV-29  | pBT264-[ <i>miR-34a</i> ]                                                                               |
| pAWSV-30  | pBT264-[ <i>miR-373</i> ]                                                                               |
| pAWSV-31  | pBT264-[ <i>miR-376a</i> ]                                                                              |
| pAWSV-32  | pBT264-[ <i>miR-429</i> ]                                                                               |
| pAWSV-33  | pBT264-[ <i>miR-451/144/4732</i> cluster]                                                               |
| pAWSV-34  | pBT264-[ <i>miR-488</i> ]                                                                               |
| pAWSV-35  | pBT264-[ <i>miR-489</i> ]                                                                               |
| pAWSV-36  | pBT264-[ <i>miR-708</i> ]                                                                               |
| pAWSV-37  | pBT264-[ <i>miR-9-1</i> ]                                                                               |
| pAWSV-38  | pBT264-[ <i>miR-93/106b</i> cluster]                                                                    |
| pAWSV-39  | pBT264-[ <i>miR-99a</i> ]                                                                               |
| pAWp11    | pFUGW-CMVp                                                                                              |
| pAWp11-1  | pFUGW-CMVp-[ <i>let-7e/miR-99b</i> cluster + <i>miR-15b/16-2</i> cluster]                               |
| pAWp11-2  | pFUGW-CMVp-[ <i>let-7e/miR-99b</i> cluster]                                                             |
| pAWp11-3  | pFUGW-CMVp-[ <i>let-7i + miR-128b + miR-212</i> ]                                                       |
| pAWp11-4  | pFUGW-CMVp-[ <i>let-7i + miR-128b</i> ]                                                                 |
| pAWp11-5  | pFUGW-CMVp-[ <i>let-7i + miR-132 + miR-15b/16-2</i> cluster]                                            |
| pAWp11-6  | pFUGW-CMVp-[ <i>let-7i + miR-132</i> ]                                                                  |
| pAWp11-7  | pFUGW-CMVp-[ <i>let-7i + miR-15b/16-2</i> cluster]                                                      |
| pAWp11-8  | pFUGW-CMVp-[ <i>let-7i + miR-181c</i> ]                                                                 |
| pAWp11-9  | pFUGW-CMVp-[ <i>let-7i + miR-212</i> ]                                                                  |
| pAWp11-10 | pFUGW-CMVp-[ <i>let-7i + miR-373 + miR-181c</i> ]                                                       |
| pAWp11-11 | pFUGW-CMVp-[ <i>let-7i + miR-373</i> ]                                                                  |
| pAWp11-12 | pFUGW-CMVp-[ <i>let-7i</i> ]                                                                            |
| pAWp11-13 | pFUGW-CMVp-[ <i>miR-126 + miR-181a + miR-451/144/4732</i> cluster]                                      |
| pAWp11-14 | pFUGW-CMVp-[ <i>miR-128b + let-7e/miR-99b</i> cluster]                                                  |
| pAWp11-15 | pFUGW-CMVp-[ <i>miR-128b + miR-212</i> ]                                                                |
| pAWp11-16 | pFUGW-CMVp-[ <i>miR-128b</i> ]                                                                          |
| pAWp11-17 | pFUGW-CMVp-[ <i>miR-132 + miR-15b/16-2</i> cluster]                                                     |
| pAWp11-18 | pFUGW-CMVp-[ <i>miR-132</i> ]                                                                           |
| pAWp11-19 | pFUGW-CMVp-[ <i>miR-15b/16-2</i> cluster]                                                               |
| pAWp11-20 | pFUGW-CMVp-[ <i>miR-16-1/15a</i> cluster + <i>let-7e/miR-99b</i> cluster + <i>miR-15b/16-2</i> cluster] |
| pAWp11-21 | pFUGW-CMVp-[ <i>miR-16-1/15a</i> cluster + <i>let-7e/miR-99b</i> cluster]                               |
| pAWp11-22 | pFUGW-CMVp-[ <i>miR-16-1/15a</i> cluster + <i>miR-128b + let-7e/miR-99b</i> cluster]                    |
| pAWp11-23 | pFUGW-CMVp-[ <i>miR-16-1/15a</i> cluster + <i>miR-128b</i> ]                                            |
| pAWp11-24 | pFUGW-CMVp-[ <i>miR-16-1/15a</i> cluster + <i>miR-15b/16-2</i> cluster]                                 |
| pAWp11-25 | pFUGW-CMVp-[ <i>miR-16-1/15a</i> cluster + <i>miR-181c + let-7e/miR-99b</i> cluster]                    |
| pAWp11-26 | pFUGW-CMVp-[ <i>miR-16-1/15a</i> cluster + <i>miR-181c</i> ]                                            |
| pAWp11-27 | pFUGW-CMVp-[ <i>miR-16-1/15a</i> cluster]                                                               |
| pAWp11-28 | pFUGW-CMVp-[ <i>miR-181c + let-7e/miR-99b</i> cluster]                                                  |
| pAWp11-29 | pFUGW-CMVp-[ <i>miR-181c</i> ]                                                                          |
| pAWp11-30 | pFUGW-CMVp-[ <i>miR-199b/3154</i> cluster]                                                              |
| pAWp11-31 | pFUGW-CMVp-[ <i>miR-212</i> ]                                                                           |
| pAWp11-32 | pFUGW-CMVp-[ <i>miR-29a + miR-34a</i> ]                                                                 |
| pAWp11-33 | pFUGW-CMVp-[ <i>miR-29a</i> ]                                                                           |
| pAWp11-34 | pFUGW-CMVp-[ <i>miR-31 + miR-132 + miR-15b/16-2</i> cluster]                                            |
| pAWp11-35 | pFUGW-CMVp-[ <i>miR-31 + miR-132</i> ]                                                                  |
| pAWp11-36 | pFUGW-CMVp-[ <i>miR-31 + miR-15b/16-2</i> cluster]                                                      |
| pAWp11-37 | pFUGW-CMVp-[ <i>miR-31 + miR-29a + miR-34a</i> ]                                                        |
| pAWp11-38 | pFUGW-CMVp-[ <i>miR-31 + miR-29a</i> ]                                                                  |
| pAWp11-39 | pFUGW-CMVp-[ <i>miR-31 + miR-34a</i> ]                                                                  |

|           |                                                                        |
|-----------|------------------------------------------------------------------------|
| pAWp11-40 | pFUGW-CMVp-[ <i>miR-31</i> + <i>miR-376a</i> + <i>miR-34a</i> ]        |
| pAWp11-41 | pFUGW-CMVp-[ <i>miR-31</i> ]                                           |
| pAWp11-42 | pFUGW-CMVp-[ <i>miR-328</i> ]                                          |
| pAWp11-43 | pFUGW-CMVp-[ <i>miR-34a</i> + <i>miR-199b/3154</i> cluster]            |
| pAWp11-44 | pFUGW-CMVp-[ <i>miR-34a</i> + <i>miR-328</i> ]                         |
| pAWp11-45 | pFUGW-CMVp-[ <i>miR-34a</i> + <i>miR-429</i> ]                         |
| pAWp11-46 | pFUGW-CMVp-[ <i>miR-34a</i> ]                                          |
| pAWp11-47 | pFUGW-CMVp-[ <i>miR-373</i> + <i>miR-181c</i> ]                        |
| pAWp11-48 | pFUGW-CMVp-[ <i>miR-373</i> ]                                          |
| pAWp11-49 | pFUGW-CMVp-[ <i>miR-376a</i> + <i>miR-16-1/15a</i> cluster]            |
| pAWp11-50 | pFUGW-CMVp-[ <i>miR-376a</i> ]                                         |
| pAWp11-51 | pFUGW-CMVp-[ <i>miR-429</i> ]                                          |
| pAWp11-52 | pFUGW-CMVp-[ <i>miR-93/106b</i> cluster + <i>miR-16-1/15a</i> cluster] |
| pAWp11-53 | pFUGW-CMVp-[ <i>miR-93/106b</i> cluster]                               |

**Supplementary Table 14** List of Primers Used for qRT-PCR

| <b>Gene</b>   | <b>Forward primer (5' to 3')</b> | <b>Reverse primer (5' to 3')</b> |
|---------------|----------------------------------|----------------------------------|
| <i>AKT3</i>   | TGCAGCCACCATGAAGACAT             | GTCCTCCACCAAGGCGTTA              |
| <i>BCL2</i>   | GGAGGCTGGGATGCCTTTGT             | GACTTCACTTGTGGCCCAGAT            |
| <i>BMI1</i>   | GCTGGTTGCCATTGACAG               | AAAAATCCCGGAAAGAGCAGC            |
| <i>CAPRN1</i> | CTGGCTATCAACGGGATGGA             | GCCAGAACAGAAGCTCCACT             |
| <i>CCND1</i>  | GGC AGC AGA AGC GAG AGC          | CTC GCA GAC CTC CAG CAT          |
| <i>CCND3</i>  | GAGCTGCTGTGTTGCGAAGG             | CGCTGCTCCTCACATACCTCC            |
| <i>CCNE1</i>  | CCCATCATGCCGAGGGAG               | TATTGTCCCAAGGCTGGCTC             |
| <i>CCNT2</i>  | CGGAGGAGGAAGTGTATGG              | GCTGAGAGACATTGAGACGCT            |
| <i>CDC14B</i> | TAAACTTCGGGGGTGTGGTC             | CAAAATCTGCGTAGAAGTTCTCAT         |
| <i>CDK1</i>   | AAGCCGGGATCTACCATACC             | CATGGCTACCACTTGACCTGT            |
| <i>CDK6</i>   | GCTGGTAACTCCTTCCCCAG             | GTCCAGAATCATTGCACCTGAG           |
| <i>CHEK1</i>  | AGGGATCAGCTTTTCCCAGC             | CTCCAATCCATCACCTGATTC            |
| <i>DMTF1</i>  | TGGTGGACCATCAAAGGCA              | AGGAGAGTCTGCTGAAGAAACA           |
| <i>E2F3</i>   | TCTACACCACGCCGCAC                | CCTTCGCTTTGCCGGAGG               |
| <i>FBXW7</i>  | AGTTTTGTTGCCGGTTCTGC             | TGGTCCAACCTTTCTTTTCATTTGT        |
| <i>HMGA1</i>  | TGCTGCGCTCCTCTAATGG              | GCAGGTGGAAGAGTGATGG              |
| <i>KLF4</i>   | CTGGGTCTTGAGGAAGTGCT             | GGCATGAGCTCTTGGTAATGG            |
| <i>KMT2A</i>  | AAGGCGAAGTGGTTCCTGAG             | AGGACGGCACTCCACTATCT             |
| <i>PIM1</i>   | CTGGGGAGAGCTGCCTAATG             | GCTCCCCTTTCCGTGATGAA             |
| <i>PURA</i>   | GGCGCTCAAAGCGAGTTC               | CTCCTCCACTCCGTAGTCGT             |
| <i>RUNX1</i>  | AATCGGCTTGTGTGATGCG              | GCCACCACCTTGAAAGCGAT             |
| <i>ZYX</i>    | CTGCTTACCTGTGTGGTCT              | GGCGTACTGCTTGTGGTAGT             |

62. Kastl, L., Brown, I. & Schofield, A. C. MiRNA-34a is associated with docetaxel resistance in human breast cancer cells. *Breast Cancer Res. Treat.* **131**, 445–454 (2012).
63. Salter, K. H. *et al.* An integrated approach to the prediction of chemotherapeutic response in patients with breast cancer. *PLoS One* **3**, e1908 (2008).
64. Zhou, M. *et al.* MicroRNA-125b confers the resistance of breast cancer cells to paclitaxel through suppression of pro-apoptotic Bcl-2 antagonist killer 1 (Bak1) expression. *J. Biol. Chem.* **285**, 21496–21507 (2010).
65. Bitarte, N. *et al.* MicroRNA-451 is involved in the self-renewal, tumorigenicity, and chemoresistance of colorectal cancer stem cells. *Stem Cells* **29**, 1661–1671 (2011).
66. Chen, G. Q., Zhao, Z. W., Zhou, H. Y., Liu, Y. J. & Yang, H. J. Systematic analysis of microRNA involved in resistance of the MCF-7 human breast cancer cell to doxorubicin. *Med. Oncol.* **27**, 406–415 (2010).
67. Donzelli, S. *et al.* MicroRNAs: short non-coding players in cancer chemoresistance. *Mol. Cell. Ther.* **2**, 16 (2014).
68. Laios, A. *et al.* Potential role of miR-9 and miR-223 in recurrent ovarian cancer. *Mol. Cancer* **7**, 35 (2008).
69. Liang, Z. *et al.* Involvement of miR-326 in chemotherapy resistance of breast cancer through modulating expression of multidrug resistance-associated protein 1. *Biochem Pharmacol* **79**, 817–824 (2010).
70. Mitamura, T. *et al.* Downregulation of miRNA-31 induces taxane resistance in ovarian cancer cells through increase of receptor tyrosine kinase MET. *Oncogenesis* **2**, e40 (2013).
71. Mosakhani, N., Mustjoki, S. & Knuutila, S. Down-regulation of miR-181c in imatinib-resistant chronic myeloid leukemia. *Mol. Cytogenet.* **6**, 27 (2013).
72. Pogribny, I. P. *et al.* Alterations of microRNAs and their targets are associated with acquired resistance of MCF-7 breast cancer cells to cisplatin. *Int. J. Cancer* **127**, 1785–1794 (2010).
73. Weidhaas, J. B. *et al.* MicroRNAs as potential agents to alter resistance to cytotoxic anticancer therapy. *Cancer Res.* **67**, 11111–11116 (2007).
74. Xin, F. *et al.* Computational analysis of microRNA profiles and their target genes suggests significant involvement in breast cancer antiestrogen resistance. *Bioinformatics* **25**, 430–434 (2009).
75. Yang, N. *et al.* MicroRNA microarray identifies Let-7i as a novel biomarker and therapeutic target in human epithelial ovarian cancer. *Cancer Res.* **68**, 10307–10314 (2008).
76. Yu, P. N. *et al.* Downregulation of miR-29 contributes to cisplatin resistance of ovarian cancer cells. *Int. J. Cancer* **134**, 542–551 (2013).
77. Karaayvaz, M., Zhai, H. & Ju, J. miR-129 promotes apoptosis and enhances chemosensitivity to 5-fluorouracil in colorectal cancer. *Cell Death Dis.* **4**, e659 (2013).
78. Luo, G. *et al.* Highly lymphatic metastatic pancreatic cancer cells possess stem cell-like properties. *Int J Oncol* **42**, 979–984 (2013).
79. Nam, E. J. *et al.* MicroRNA expression profiles in serous ovarian carcinoma. *Clin. Cancer Res.* **14**, 2690–2695 (2008).
80. Zhang, L. *et al.* Genomic and epigenetic alterations deregulate microRNA expression in human epithelial ovarian cancer. *Proc. Natl. Acad. Sci. U. S. A.* **105**, 7004–7009 (2008).
